# Supplementary material for: One-pot synthesis of multisubstituted propenylbenzenes from benzyl chlorides through relay catalysis of palladium
Source: Royal Society of Chemistry journal article supplement (doi:10.1039/d3ob00736g), 2023-01-01
Supplement: d3ob00736g1.pdf [file d3ob00736g1.pdf]

## Supporting Information

# One-pot Synthesis of Multisubstituted Propenylbenzenes from Benzyl Chlorides through Relay Catalysis of Palladium

Haiyu Wang,<sup>[a]</sup> Sheng Zhang,<sup>\*[a]</sup> Xiujuan Feng,<sup>[a]</sup> Xiaoqiang Yu,<sup>[a]</sup> Masahiko  
Yamaguchi,<sup>[a]</sup> and Ming Bao<sup>\*[a]</sup>

[a] State Key Laboratory of Fine Chemicals, Dalian University of Technology, Dalian  
116024, China

E-mail: shengzhang@dlut.edu.cn; mingbao@dlut.edu.cn

### Table of Contents

|                                                                                                               |     |
|---------------------------------------------------------------------------------------------------------------|-----|
| 1. Experimental Section .....                                                                                 | S2  |
| 2. Optimization Studies .....                                                                                 | S2  |
| 3. Synthesis of Starting Materials .....                                                                      | S3  |
| 4. General Procedure for Transformation of Products .....                                                     | S5  |
| 5. Cyclic Voltammetry (CV) Analysis of PPh <sub>3</sub> , Bu <sub>3</sub> SnCl and Pd(OAc) <sub>2</sub> ..... | S7  |
| 6. Characterization Data .....                                                                                | S8  |
| 7. Copies of <sup>1</sup> H and <sup>13</sup> C NMR Spectra .....                                             | S20 |
| 8. References .....                                                                                           | S63 |

## 1. Experimental Section

### General information:

Unless otherwise noted, all reactions were carried out in oven-dried 25-mL Schlenk tubes under a nitrogen atmosphere. An aluminum heating block placed on a stirring plate was used as the heating source. Solvents were purified by standard techniques without special instructions.  $^1\text{H}$  and  $^{13}\text{C}$  NMR spectra were recorded on either a Bruker AvanceII-400 spectrometer (400 MHz for  $^1\text{H}$ , 100 MHz for  $^{13}\text{C}$ );  $\text{CDCl}_3$  and TMS were used as a solvent and an internal standard, respectively. The NMR yield was determined by  $^1\text{H}$  NMR using 1,3,5-Trimethoxybenzene as an internal standard. The chemical shifts are reported in ppm downfield ( $\delta$ ) from TMS, the coupling constants  $J$  are given in Hz. The peak patterns are indicated as follows: s, singlet; d, doublet; t, triplet; q, quartet; m, multiplet. IR spectra were recorded on a NEXUS FT-IR spectrometer. High resolution mass spectra were recorded on either a Q-TOF mass spectrometry or a LTQ Orbitrap XL mass spectrometry. TLC was carried out on  $\text{SiO}_2$  (silica gel 60 F254, Merck), and the spots were located with UV light. Flash chromatography was carried out on  $\text{SiO}_2$  (silica gel 60, 200-300 mesh) or basic  $\text{Al}_2\text{O}_3$  ( $\text{Al}_2\text{O}_3$  90, 100-200 mesh). Unless otherwise noted, starting materials are commercially available.

Cyclic voltammetry experiments were executed in undivided three-electrode cells. The potentials were measured against Ag/AgCl (3 M KCl) aqueous reference electrode. The working electrode was a 3 mm diameter glassy carbon disk, and the counter electrode was a platinum wire. The glassy carbon working electrode was polished with diamond polishing suspension between each experiment.

### General Procedure:

Benzyl chloride (**1a**, 64.0 mg, 0.3 mmol) and allyltributylstannane (0.3 mmol, 100.0 mg) were added into a mixture of  $\text{Pd}_2(\text{dba})_3$  (13.7 mg, 0.015 mmol) and  $\text{PPh}_3$  (15.7 mg, 0.06 mmol), in dry dichloromethane (2.0 mL). After the reaction mixture was stirred at room temperature for 24 h under  $\text{N}_2$  atmosphere, 4-toluenesulfonic acid monohydrate ( $\text{TsOH} \cdot \text{H}_2\text{O}$ , 0.6 mmol, 142.0 mg) was subsequently added, and the reaction mixture was stirred at 40  $^\circ\text{C}$  for 12 h. Purification by basic alumina column chromatography (eluent: hexane) followed by distillation under reduced pressure to give propenylbenzene **2a** as a yellow solid in the yield of 60%.

## 2. Optimization Studies

A mixture of *ortho*-allylation product **2aa** and *meta*-allylation product **2aa'** was obtained in 10% yield totally when the mixture of 4-ethylbenzyl chloride **1aa** with allyltributylstannane was purified by silica gel column (Scheme S1).

### Scheme S1. Effect of silica gel on dearomatization product

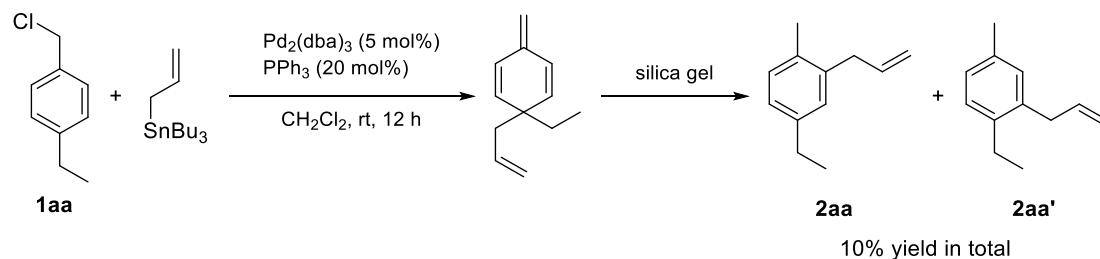

A mixture of 1,2-allylic rearrangement product **3aa** and 1,2-phenyl rearrangement product **3aa'** were obtained under standard reaction conditions when used 2,4-diphenylbenzyl chloride **3a** as substrate (Scheme S2).

**Scheme S2. Reactions of 2,4-diphenylbenzyl chloride **3a** as substrate<sup>a</sup>**

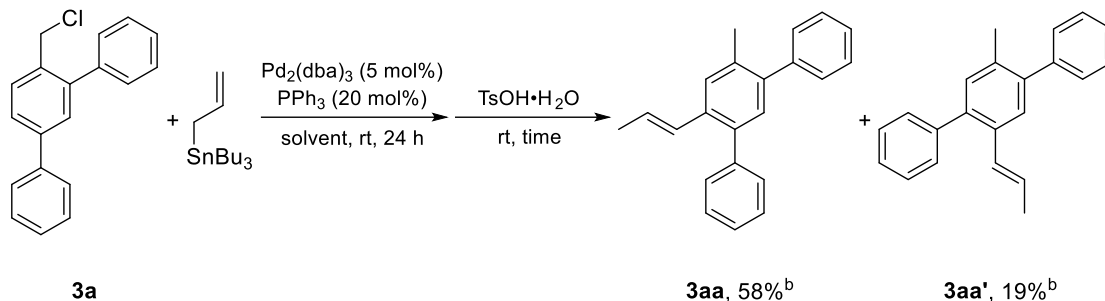

<sup>a</sup>Reaction conditions: **3a** (0.3 mmol), allyltributylstannane (0.3 mmol),  $\text{Pd}_2(\text{dba})_3$  (5 mol%) and  $\text{PPh}_3$  (20 mol%) in 2.0 mL of solvent at room temperature for 24 h under  $\text{N}_2$  atmosphere.  $\text{TsOH}\cdot\text{H}_2\text{O}$  (0.6 mmol) was subsequently added, and the reaction mixture was stirred for 12 h. <sup>b</sup>Yields were determined by  $^1\text{H}$  NMR using 1,3,5-trimethoxybenzene as an internal standard.

Different Lewis acids were employed to replace  $\text{Bu}_3\text{SnCl}$  under the standard reaction conditions, the results are shown in Table S1.

**Table S1. Optimization of Lewis acid<sup>a</sup>**

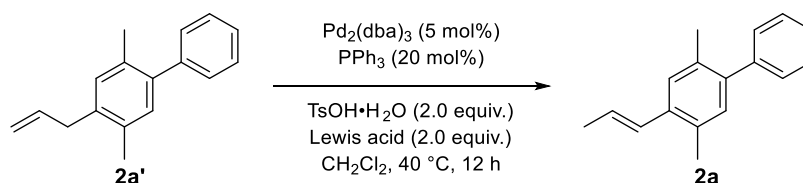

| entry | Lewis acid                                         | yield (%) <sup>b</sup> |
|-------|----------------------------------------------------|------------------------|
| 1     | -                                                  | 54                     |
| 2     | $\text{Bu}_3\text{SnCl}$                           | 90                     |
| 3     | $\text{AlCl}_3$                                    | 18                     |
| 4     | $(\text{CH}_3)_3\text{SiCl}$                       | trace                  |
| 5     | $\text{TiCl}_4$                                    | 0                      |
| 6     | $\text{SnCl}_4$                                    | 0                      |
| 7     | $\text{CF}_3\text{SO}_3\text{La}$                  | 0                      |
| 8     | $(\text{CH}_3)_3\text{SiCl}$                       | 0                      |
| 9     | $\text{BF}_3\cdot\text{O}(\text{C}_2\text{H}_5)_2$ | 0                      |

<sup>a</sup>Reaction conditions: allylation product **2a'** (0.3 mmol), Lewis acid (0.6 mmol),  $\text{Pd}_2(\text{dba})_3$  (5 mmol%),  $\text{PPh}_3$  (20 mmol%) and  $\text{TsOH}\cdot\text{H}_2\text{O}$  (0.6 mmol) in 2.0 mL of  $\text{CH}_2\text{Cl}_2$  at room temperature for 12 h. <sup>b</sup>Isolated yield.

### 3. Synthesis of Starting Materials

### Representative procedure for synthesis of 1a-1o (Method A)

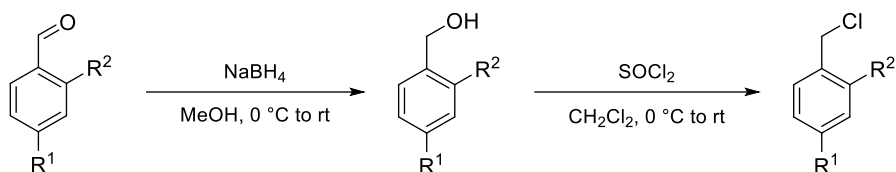

To a solution of aryl aldehyde (5 mmol) in MeOH (20 mL) at 0 °C, NaBH<sub>4</sub> (0.38 g, 10 mmol) was slowly added. The reaction mixture was slowly warmed to room temperature and stirred overnight. The resulting mixture was washed with 5% HCl (aq.), brine, and H<sub>2</sub>O, then extracted with EtOAc three times, and the combined organic layers were dried over Na<sub>2</sub>SO<sub>4</sub>, filtrated, and then concentrated under vacuum. The crude product was washed with hexane to afford the aryl alcohol as a white solid.

To a solution of the aryl alcohol (5 mmol) in CH<sub>2</sub>Cl<sub>2</sub> (20 mL) at 0 °C, SOCl<sub>2</sub> (10 mmol) was slowly added. The reaction mixture was slowly warmed to room temperature and stirred overnight. After washed with saturated NaHCO<sub>3</sub> (aq.), brine, and H<sub>2</sub>O, the combined organic layers were dried over Na<sub>2</sub>SO<sub>4</sub>, filtrated, and then concentrated under vacuum to give a crude product. The crude product was purified by silica gel column chromatography (eluent: hexane) to afford the desired benzyl chloride product.

### Representative procedure for synthesis of 1a-1l, and 1n-1o<sup>1</sup>

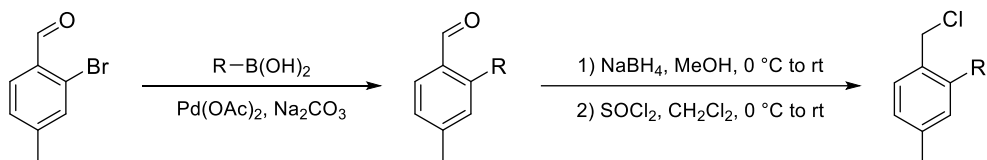

To a solution of 2-bromo-4-methylbenzaldehyde (0.50 g, 5 mmol) and Na<sub>2</sub>CO<sub>3</sub> (1.38 g, 10 mmol) in 10 mL DMF/H<sub>2</sub>O (v/v = 2:1) was added phenylboronic acid (0.67 g, 5.5 mmol), and stirred for 5 min. After Pd(OAc)<sub>2</sub> (56 mg, 0.25 mmol) was added, the resulting mixture was stirred overnight at room temperature under N<sub>2</sub> atmosphere. The resulting mixture was extracted with EtOAc three times, and then the combined organic layers were dried over Na<sub>2</sub>SO<sub>4</sub>. The Na<sub>2</sub>SO<sub>4</sub> was removed through filtration, and the filtrate was concentrated under vacuum to afford a crude product. The crude product was purified by silica gel column chromatography (eluent: hexane/EtOAc = 20/1) to afford the desired 2-phenyl-4-methylbenzaldehyde (0.81 g, 4.15 mmol, 83% yield). The 2-(chloromethyl)-5-methyl-1,1'-biphenyl **1a** was finally obtained by means of Method A as a colorless oil (0.77 g, 71% total yield).

### Representative procedure for synthesis of 1m

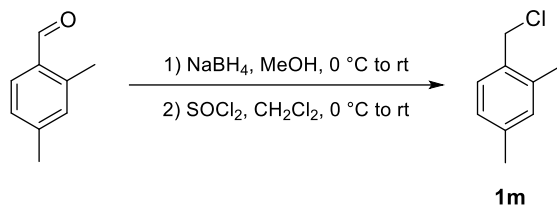

2,4-dimethylbenzaldehyde (0.67 g, 5 mmol) was used to synthesize 1-(chloromethyl)-2,4-dimethylbenzene **1m** by means of Method A as a colorless oil (1.06 g, 77% total yield).

#### Procedure for synthesis of **3a**<sup>2</sup>

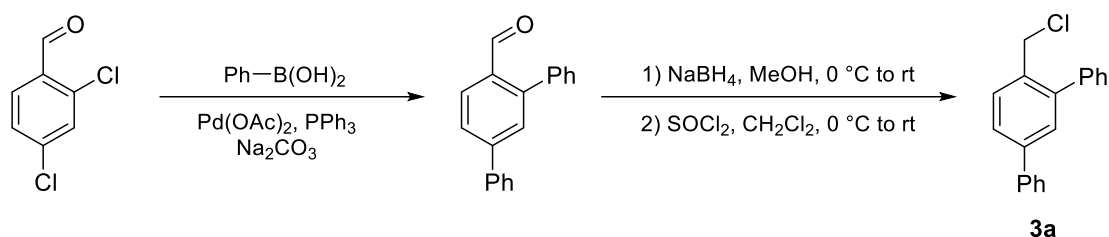

A solution of Pd(OAc)<sub>2</sub> (68 mg, 0.30 mmol) and PPh<sub>3</sub> (0.39 g, 1.50 mmol) in 5 mL absolute ethanol and 5 mL toluene was stirred at room temperature under N<sub>2</sub> atmosphere for 10 min. After that period, 2,4-dichlorobenzaldehyde (0.87 g, 5 mmol), Na<sub>2</sub>CO<sub>3</sub> (2.35 g, 22 mmol) and phenylboronic acid (3.05 g, 25 mmol) were sequentially added. The resulting mixture was stirred at 100 °C under N<sub>2</sub> atmosphere for 24 h. The resulting mixture was extracted with EtOAc three times, and then the combined organic layers were dried over Na<sub>2</sub>SO<sub>4</sub>. The Na<sub>2</sub>SO<sub>4</sub> was removed through filtration, and the filtrate was concentrated under vacuum to afford a crude product. The crude product was purified by silica gel column chromatography (eluent: hexane/EtOAc = 20/1) to afford the desired [1,1':3,1''-terphenyl]-4'-carbaldehyde (1.03 g, 4 mmol, 80% yield). The 4'-(chloromethyl)-1,1':3,1''-terphenyl **3a** was finally obtained by means of Method A as a colorless oil (0.89 g, 64% total yield).

#### 4. General Procedure for Transformation of Products

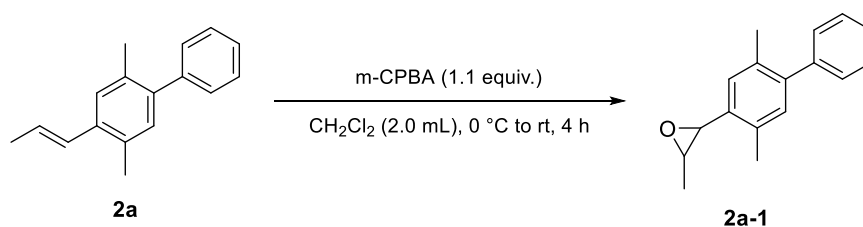

To a solution of **2a** (66.6 mg, 0.3 mmol) in anhydrous CH<sub>2</sub>Cl<sub>2</sub> (2.0 mL), *m*-CPBA (56.9 mg, 0.33 mmol) was added at 0 °C under nitrogen atmosphere. After stirring for 4 h, the reaction mixture was quenched with a saturated solution of NaHCO<sub>3</sub> and extracted with CH<sub>2</sub>Cl<sub>2</sub> three times. The organic phases were collected and dried over Na<sub>2</sub>SO<sub>4</sub>. The solvent was concentrated in vacuo to yield the epoxide which was directly used without any further purification. The combined organic layers were dried over

Na<sub>2</sub>SO<sub>4</sub>, filtrated, and concentrated in vacuo. The residue was purified by silica gel column chromatography (eluent: hexane/EtOAc = 100/1 to 50/1) to afford the epoxide product **2a-1** (35.0 mg, 49% yield)<sup>3</sup>.

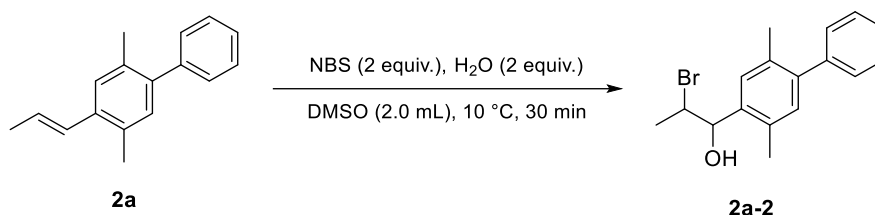

To a solution of **2a** (66.6 mg, 0.3 mmol) in DMSO (2.0 mL), water (10.8 mg, 0.6 mmol) was added under nitrogen atmosphere and cooled to ca. 10 °C. With stirring, NBS (106.8 mg, 0.6 mmol) was added as one portion. After a short induction period of 2-3 min a yellow color developed and the solution became quite warm. Stirring for an additional 25 min was followed by quenching of the reaction mixture with NaHCO<sub>3</sub> and extracted with EtOAc three times. The residue was purified by silica gel column chromatography (eluent: hexane/EtOAc = 20/1 to 10/1) to afford the bromohydrin product **2a-2** (61.1 mg, 64% yield)<sup>4</sup>.

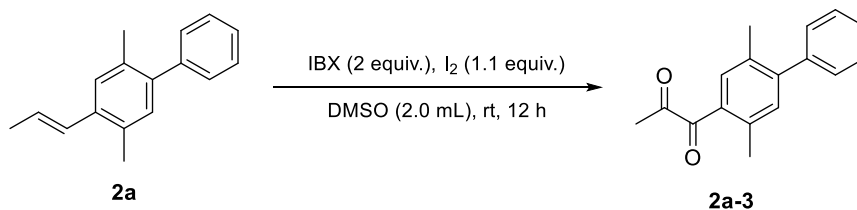

To a solution of IBX (168.0 mg, 0.6 mmol) and iodine (83.8 mg, 0.33 mmol) in dry DMSO (2.0 mL) stirred at room temperature was added **2a** (66.6 mg, 0.3 mmol) in one charge. The reaction mixture was stirred at room temperature overnight. Then it was diluted with CH<sub>2</sub>Cl<sub>2</sub> (15 mL) and washed with saturated aqueous NaHCO<sub>3</sub>–Na<sub>2</sub>S<sub>2</sub>O<sub>3</sub>. Then the resulting mixture was extracted with EtOAc three times. The residue was purified by silica gel column chromatography (eluent: hexane/EtOAc = 50/1) to afford the diketone product **2a-3** (28.7 mg, 38% yield)<sup>5</sup>.

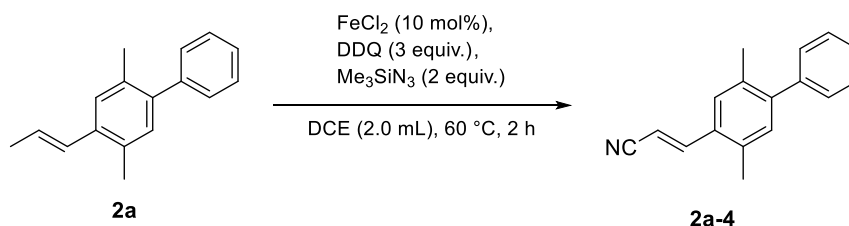

An oven-dried Schlenk tube was charge with FeCl<sub>2</sub> (3.8 mg, 0.03 mmol), DDQ (204.6 mg, 0.9 mmol), **2a** (66.6 mg, 0.3 mmol), Me<sub>3</sub>SiN<sub>3</sub> (69.1 mg, 0.6 mmol) and DCE (2.0 mL). The reaction mixture was stirred at 60 °C under air for 2 h. After cooling down to room temperature and concentrating in vacuum, the residue was purified by silica gel column chromatography (eluent: hexane/EtOAc = 50/1) to afford the alkenyl nitriles product **2a-4** (37.8 mg, 54% yield)<sup>6</sup>.

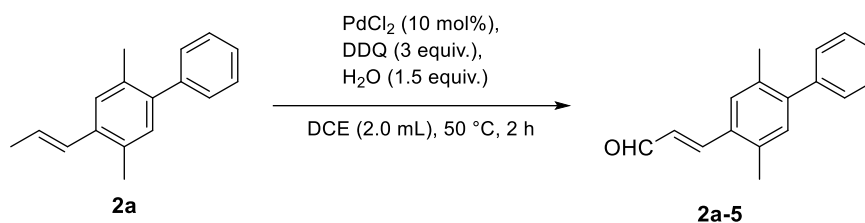

An oven-dried Schlenk tube was charge with PdCl<sub>2</sub> (5.3 mg, 0.03 mmol), DDQ (204.6 mg, 0.9 mmol), **2a** (66.6 mg, 0.3 mmol), H<sub>2</sub>O (8.1 mg, 0.45 mmol) and DCE (2.0 mL). The reaction mixture was stirred at 50 °C for 2 h. After cooling down to room temperature and concentrating in vacuum, the residue was purified by silica gel column chromatography (eluent: hexane/EtOAc = 50/1 to 20/1) to afford the alkenyl aldehydes product **2a-5** (46.8 mg, 66% yield)<sup>7</sup>.

## 5. Cyclic Voltammetry (CV) Analysis of PPh<sub>3</sub>, Bu<sub>3</sub>SnCl and Pd(OAc)<sub>2</sub>

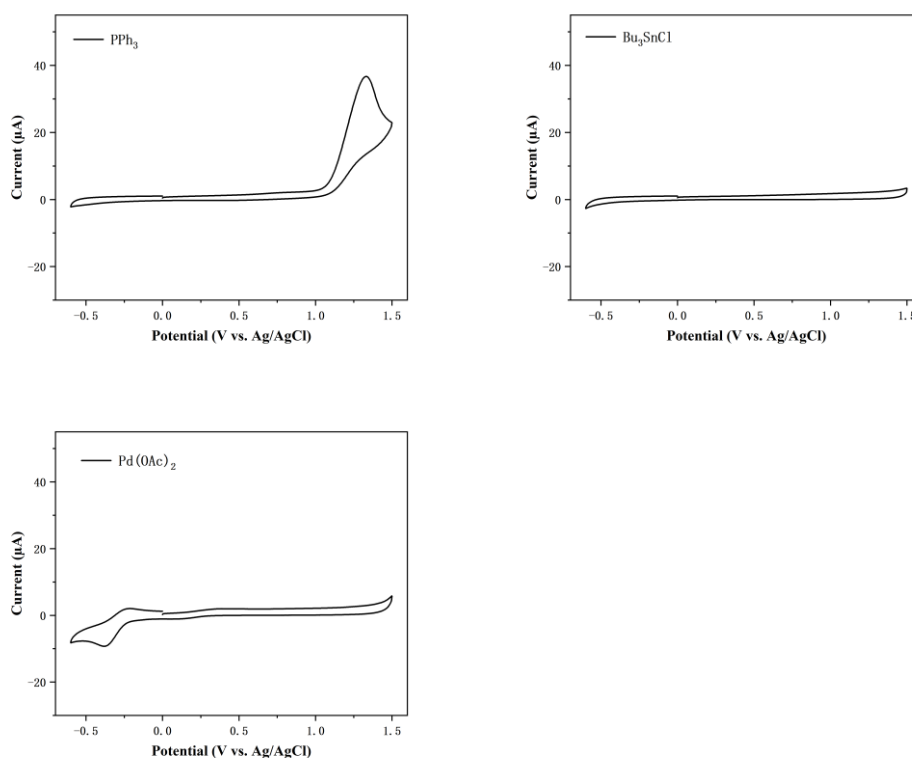

**Figure S1.** Top left: CV of 2 mM PPh<sub>3</sub> in CH<sub>2</sub>Cl<sub>2</sub> with Bu<sub>4</sub>NPF<sub>6</sub> (0.1 M) as a supporting electrolyte. Top right: CV of 2 mM Bu<sub>3</sub>SnCl in CH<sub>2</sub>Cl<sub>2</sub> with Bu<sub>4</sub>NPF<sub>6</sub> (0.1 M) as a supporting electrolyte. Bottom left: CV of 1 mM Pd(OAc)<sub>2</sub> in CH<sub>2</sub>Cl<sub>2</sub> with Bu<sub>4</sub>NPF<sub>6</sub> (0.1 M) as a supporting electrolyte. Scan rate = 0.1 V/s. The redox feature of PPh<sub>3</sub> onsets at ca. 1.3 V. No redox features of Bu<sub>3</sub>SnCl appears in this voltage range. The redox feature of Pd(OAc)<sub>2</sub> onsets at ca. -0.4 V.

## 6. Characterization Data

### 2-(Chloromethyl)-5-methyl-1,1'-biphenyl (1a)

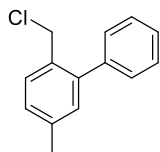

1a

Colorless oil (0.70 g, 59% yield),  $^1\text{H}$  NMR (400 MHz,  $\text{CDCl}_3$ )  $\delta$  7.47–7.31 (m, 6H), 7.22–7.13 (m, 1H), 7.09 (s, 1H), 4.49 (s, 2H), 2.36 (s, 3H);  $^{13}\text{C}\{^1\text{H}\}$  NMR (100 MHz,  $\text{CDCl}_3$ )  $\delta$  142.0, 140.4, 138.5, 132.1, 131.0, 130.5, 129.1, 128.7, 128.3, 127.4, 44.5, 21.2; IR (neat):  $\nu_{\text{max}}$  3027, 2924, 1611, 1488, 1444, 1262, 824, 780, 737, 701, 668  $\text{cm}^{-1}$ ; HRMS (EI)  $m/z$ :  $[\text{M}]^+$  Calcd for  $\text{C}_{14}\text{H}_{13}\text{Cl}$  216.0706; Found 216.0696.

### 2-(Chloromethyl)-4'-fluoro-5-methyl-1,1'-biphenyl (1b)

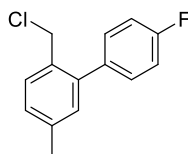

1b

Colorless oil (0.62 g, 53% yield),  $^1\text{H}$  NMR (400 MHz,  $\text{CDCl}_3$ )  $\delta$  7.56–7.39 (m, 3H), 7.28–7.22 (m, 1H), 7.22–7.09 (m, 3H), 4.53 (s, 2H), 2.43 (s, 3H);  $^{13}\text{C}\{^1\text{H}\}$  NMR (100 MHz,  $\text{CDCl}_3$ )  $\delta$  162.3 (d,  $J = 246.6$  Hz), 141.0, 138.7, 136.3 (d,  $J = 3.4$  Hz), 132.2, 131.1, 130.8, 130.7 (d,  $J = 5.9$  Hz), 128.9, 115.2 (d,  $J = 21.2$  Hz), 44.5, 21.2; IR (neat):  $\nu_{\text{max}}$  2925, 1611, 1513, 1495, 1445, 1224, 1158, 1093, 1015, 879, 839, 752, 670  $\text{cm}^{-1}$ ; HRMS (EI)  $m/z$ :  $[\text{M}]^+$  Calcd for  $\text{C}_{14}\text{H}_{12}\text{ClF}$  234.0612; Found 234.0604.

### 4'-Chloro-2-(chloromethyl)-5-methyl-1,1'-biphenyl (1c)

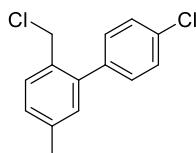

1c

White solid (0.76 g, 61% yield), M. p. = 60–61  $^{\circ}\text{C}$ ;  $^1\text{H}$  NMR (400 MHz,  $\text{CDCl}_3$ )  $\delta$  7.49–7.43 (m, 3H), 7.42–7.34 (m, 2H), 7.26–7.22 (m, 1H), 7.10 (d,  $J = 1.9$  Hz, 1H), 4.51 (s, 2H), 2.42 (s, 3H);  $^{13}\text{C}\{^1\text{H}\}$  NMR (100 MHz,  $\text{CDCl}_3$ )  $\delta$  140.8, 138.8, 138.7, 133.6, 132.0, 131.0, 130.7, 130.4, 129.0, 128.5, 44.4, 21.2; IR (KBr):  $\nu_{\text{max}}$  2924, 1646, 1488, 1263, 1091, 1014, 833, 754, 715, 674  $\text{cm}^{-1}$ ; HRMS (EI)  $m/z$ :  $[\text{M}]^+$  Calcd for  $\text{C}_{14}\text{H}_{12}\text{Cl}_2$  250.0316; Found 250.0309.

### 4'-Bromo-2-(chloromethyl)-5-methyl-1,1'-biphenyl (1d)

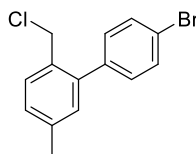

1d



White solid (0.94 g, 64% yield), M. p. = 70-71 °C;  $^1\text{H}$  NMR (400 MHz,  $\text{CDCl}_3$ )  $\delta$  7.53–7.43 (m, 2H), 7.36–7.31 (m, 1H), 7.25–7.18 (m, 2H), 7.15–7.10 (m, 1H), 6.98 (d,  $J = 1.9$  Hz, 1H), 4.38 (s, 2H), 2.30 (s, 3H);  $^{13}\text{C}\{^1\text{H}\}$  NMR (100 MHz,  $\text{CDCl}_3$ )  $\delta$  140.8, 139.2, 138.7, 132.0, 131.4, 130.84, 130.82, 130.7, 129.1, 121.7, 44.3, 21.2; IR (KBr):  $\nu_{\text{max}}$  2923, 2852, 1642, 1488, 1378, 1262, 1183, 1073, 1010, 828, 741, 712, 669  $\text{cm}^{-1}$ ; HRMS (EI)  $m/z$ :  $[\text{M}]^+$  Calcd for  $\text{C}_{14}\text{H}_{12}\text{BrCl}$  293.9811; Found 293.9804.

**2-(Chloromethyl)-4',5-dimethyl-1,1'-biphenyl (1e)**

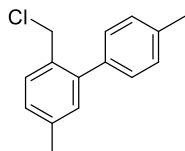

1e

Colorless oil (0.62 g, 54% yield),  $^1\text{H}$  NMR (400 MHz,  $\text{CDCl}_3$ )  $\delta$  7.43–7.39 (m, 1H), 7.33–7.27 (m, 2H), 7.26–7.21 (m, 2H), 7.19–7.15 (m, 1H), 7.08 (s, 1H), 4.51 (s, 2H), 2.41 (s, 3H), 2.37 (s, 3H);  $^{13}\text{C}\{^1\text{H}\}$  NMR (100 MHz,  $\text{CDCl}_3$ )  $\delta$  142.0, 138.4, 137.4, 137.1, 132.1, 131.1, 130.5, 129.0, 129.0, 128.5, 44.6, 21.2; IR (neat):  $\nu_{\text{max}}$  2922, 1610, 1496, 1445, 1378, 1263, 1184, 1110, 1020, 821, 750, 718, 669  $\text{cm}^{-1}$ ; HRMS (EI)  $m/z$ :  $[\text{M}]^+$  Calcd for  $\text{C}_{15}\text{H}_{15}\text{Cl}$  230.0862; Found 230.0854.

**2-(Chloromethyl)-4'-methoxy-5-methyl-1,1'-biphenyl (1f)**

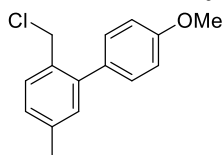

1f

White solid (0.76 g, 62% yield), M. p. = 69-70 °C;  $^1\text{H}$  NMR (400 MHz,  $\text{CDCl}_3$ )  $\delta$  7.46–7.39 (m, 1H), 7.39–7.32 (m, 2H), 7.22–7.15 (m, 1H), 7.12 (s, 1H), 7.03–6.94 (m, 2H), 4.53 (s, 2H), 3.87 (s, 3H), 2.39 (s, 3H);  $^{13}\text{C}\{^1\text{H}\}$  NMR (100 MHz,  $\text{CDCl}_3$ )  $\delta$  159.0, 141.7, 138.5, 132.7, 132.2, 131.2, 130.6, 130.2, 128.4, 113.7, 55.3, 44.7, 21.2; IR (KBr):  $\nu_{\text{max}}$  2925, 1609, 1516, 1496, 1462, 1377, 1245, 1178, 1031, 834, 755, 669  $\text{cm}^{-1}$ ; HRMS (EI)  $m/z$ :  $[\text{M}]^+$  Calcd for  $\text{C}_{15}\text{H}_{15}\text{ClO}$  246.0811; Found 246.0805.

**2-(Chloromethyl)-5-methyl-4'-(trifluoromethoxy)-1,1'-biphenyl (1g)**

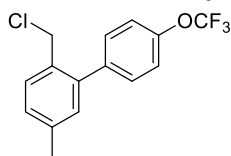

1g

Colorless oil (0.89 g, 59% yield),  $^1\text{H}$  NMR (400 MHz,  $\text{CDCl}_3$ )  $\delta$  7.57–7.44 (m, 3H), 7.39–7.31 (m, 2H), 7.30–7.23 (m, 1H), 7.14 (s, 1H), 4.53 (s, 2H), 2.44 (s, 3H);  $^{13}\text{C}\{^1\text{H}\}$  NMR (100 MHz,  $\text{CDCl}_3$ )  $\delta$  148.7, 140.6, 139.0, 138.8, 132.1, 131.0, 130.8, 130.6, 129.2, 120.7, 120.6 (q,  $J = 257.7$  Hz) 44.3, 21.2; IR (neat):  $\nu_{\text{max}}$  2925, 1611, 1513, 1494, 1258, 1104, 1018, 853, 825, 757, 674  $\text{cm}^{-1}$ ; HRMS (EI)  $m/z$ :  $[\text{M}]^+$  Calcd for  $\text{C}_{15}\text{H}_{12}\text{ClF}_3\text{O}$  300.0529; Found 300.0520.

**2'-(Chloromethyl)-5'-methyl-[1,1'-biphenyl]-4-carbonitrile (1h)**

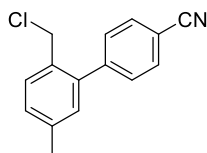

1h

White solid (0.72 g, 60% yield), M. p. = 84-85 °C;  $^1\text{H}$  NMR (400 MHz,  $\text{CDCl}_3$ )  $\delta$  7.87–7.68 (m, 2H), 7.67–7.52 (m, 2H), 7.50–7.39 (m, 1H), 7.35–7.20 (m, 1H), 7.16–6.99 (m, 1H), 4.46 (s, 2H), 2.42 (s, 3H);  $^{13}\text{C}\{^1\text{H}\}$  NMR (100 MHz,  $\text{CDCl}_3$ )  $\delta$  145.2, 140.1, 139.0, 132.1, 131.9, 131.0, 130.7, 130.0, 129.8, 118.8, 111.4, 44.1, 21.2; IR (KBr):  $\nu_{\text{max}}$  2924, 2228, 1607, 1493, 1458, 1378, 1266, 1019, 844, 755, 725, 672  $\text{cm}^{-1}$ ; HRMS (EI)  $m/z$ :  $[\text{M}]^+$  Calcd for  $\text{C}_{15}\text{H}_{12}\text{ClN}$  241.0658; Found 241.0649.

**Methyl 2'-(chloromethyl)-5'-methyl-[1,1'-biphenyl]-4-carboxylate (1i)**

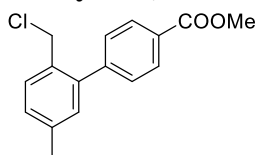

1i

White solid (0.78 g, 57% yield), M. p. = 75-76 °C;  $^1\text{H}$  NMR (400 MHz,  $\text{CDCl}_3$ )  $\delta$  8.26–8.03 (m, 2H), 7.67–7.37 (m, 2H), 7.33–7.18 (m, 1H), 7.18–7.02 (m, 1H), 7.16–7.09 (m, 1H), 4.50 (s, 2H), 3.98 (s, 3H), 2.42 (s, 3H);  $^{13}\text{C}\{^1\text{H}\}$  NMR (100 MHz,  $\text{CDCl}_3$ )  $\delta$  166.9, 145.1, 141.0, 138.7, 132.0, 130.8, 130.7, 129.6, 129.3, 129.2, 52.2, 44.2, 21.2; IR (KBr):  $\nu_{\text{max}}$  2924, 1724, 1609, 1435, 1279, 1180, 1112, 1018, 860, 824, 782, 744, 707, 670  $\text{cm}^{-1}$ ; HRMS (EI)  $m/z$ :  $[\text{M}]^+$  Calcd for  $\text{C}_{16}\text{H}_{15}\text{ClO}_2$  274.0761; Found 274.0753.

**2-(Chloromethyl)-5-methyl-4'-nitro-1,1'-biphenyl (1j)**

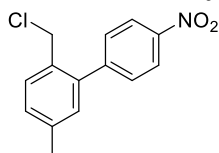

1j

White solid (0.72 g, 55% yield), M. p. = 65-66 °C;  $^1\text{H}$  NMR (400 MHz,  $\text{CDCl}_3$ )  $\delta$  8.39–8.22 (m, 2H), 7.67–7.61 (m, 2H), 7.50–7.45 (m, 1H), 7.32–7.27 (m, 1H), 7.14–7.10 (m, 1H), 4.48 (s, 2H), 2.44 (s, 3H);  $^{13}\text{C}\{^1\text{H}\}$  NMR (100 MHz,  $\text{CDCl}_3$ )  $\delta$  147.3, 147.2, 139.8, 139.1, 131.9, 131.0, 130.6, 130.1, 129.9, 123.6, 44.0, 21.2; IR (KBr):  $\nu_{\text{max}}$  2958, 2924, 1639, 1519, 1456, 1348, 1263, 1106, 1014, 849, 699  $\text{cm}^{-1}$ ; HRMS (EI)  $m/z$ :  $[\text{M}]^+$  Calcd for  $\text{C}_{14}\text{H}_{12}\text{ClNO}_2$  261.0557; Found 261.0549.

**2-(Chloromethyl)-5-methyl-4'-(trifluoromethyl)-1,1'-biphenyl (1k)**

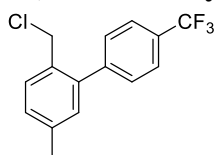

1k

Colorless oil (0.82 g, 58% yield),  $^1\text{H}$  NMR (400 MHz,  $\text{CDCl}_3$ )  $\delta$  7.79–7.74 (m, 2H), 7.64–7.58 (m, 2H), 7.52–7.48 (m, 1H), 7.30 (dd,  $J$  = 8.0, 1.9 Hz, 1H), 7.15 (d,  $J$  = 1.9

Hz, 1H), 4.52 (s, 2H), 2.46 (s, 3H);  $^{13}\text{C}\{^1\text{H}\}$  NMR (100 MHz,  $\text{CDCl}_3$ )  $\delta$  144.1, 140.6, 138.9, 132.0, 130.9, 129.7 (q,  $J = 32.4$  Hz), 129.6, 129.5, 125.3 (q,  $J = 3.8$  Hz), 124.3 (q,  $J = 272.0$  Hz), 44.2, 21.2; IR (neat):  $\nu_{\text{max}}$  2924, 1619, 1450, 1325, 1262, 1167, 1128, 1069, 1017, 847  $\text{cm}^{-1}$ ; HRMS (EI)  $m/z$ :  $[\text{M}]^+$  Calcd for  $\text{C}_{15}\text{H}_{12}\text{ClF}_3$  284.0580; Found 284.0572.

### 2-(Chloromethyl)-2',5,6'-trimethyl-1,1'-biphenyl (1l)

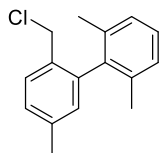

1l

White solid (0.76 g, 62% yield), M. p. = 58-59 °C;  $^1\text{H}$  NMR (400 MHz,  $\text{CDCl}_3$ )  $\delta$  7.47-7.44 (m, 1H), 7.21-7.15 (m, 2H), 7.12-7.09 (m, 2H), 6.88 (s, 1H), 4.24 (s, 2H), 2.36 (s, 3H), 1.97 (s, 6H);  $^{13}\text{C}\{^1\text{H}\}$  NMR (100 MHz,  $\text{CDCl}_3$ )  $\delta$  140.4, 139.3, 138.8, 136.2, 132.1, 130.1, 130.0, 128.6, 127.5, 127.4, 44.1, 21.2, 20.7; IR (KBr):  $\nu_{\text{max}}$  2955, 2923, 2853, 1638, 1460, 1377, 1263, 1163, 1029, 821, 768, 676  $\text{cm}^{-1}$ ; HRMS (EI)  $m/z$ :  $[\text{M}]^+$  Calcd for  $\text{C}_{16}\text{H}_{17}\text{Cl}$  244.1019; Found 244.1014.

### 1-(Chloromethyl)-2,4-dimethylbenzene (1m)<sup>7</sup>

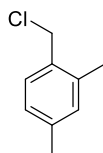

1m

Colorless oil (0.63 g, 82% yield),  $^1\text{H}$  NMR (400 MHz,  $\text{CDCl}_3$ )  $\delta$  7.25-7.22 (m, 1H), 7.09-7.00 (m, 2H), 4.64 (s, 2H), 2.44 (s, 3H), 2.36 (s, 3H);  $^{13}\text{C}\{^1\text{H}\}$  NMR (100 MHz,  $\text{CDCl}_3$ )  $\delta$  138.9, 137.1, 132.6, 131.6, 129.8, 127.0, 44.9, 21.1, 18.7;

### 2-(2-(Chloromethyl)-5-methylphenyl)thiophene (1n)

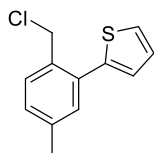

1n

White solid (0.72 g, 65% yield), M. p. = 63-64 °C;  $^1\text{H}$  NMR (400 MHz,  $\text{CDCl}_3$ )  $\delta$  7.51-7.38 (m, 3H), 7.33-7.26 (m, 1H), 7.26-7.16 (m, 2H), 4.61 (s, 2H), 2.41 (s, 3H);  $^{13}\text{C}\{^1\text{H}\}$  NMR (100 MHz,  $\text{CDCl}_3$ )  $\delta$  140.5, 138.7, 136.7, 132.2, 130.9, 130.8, 128.9, 128.8, 125.6, 123.2, 44.9, 21.2; IR (KBr):  $\nu_{\text{max}}$  2923, 1611, 1445, 1377, 1263, 847, 824, 790, 744, 668  $\text{cm}^{-1}$ ; HRMS (EI)  $m/z$ :  $[\text{M}]^+$  Calcd for  $\text{C}_{12}\text{H}_{11}\text{ClS}$  222.0270; Found 222.0261.

### 2-(2-(Chloromethyl)-5-methylphenyl)naphthalene (1o)

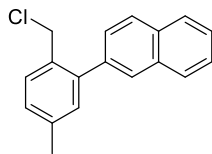

1o

White solid (0.73 g, 55% yield), M. p. = 66-67 °C;  $^1\text{H}$  NMR (400 MHz,  $\text{CDCl}_3$ )  $\delta$  7.90–7.83 (m, 4H), 7.55–7.42 (m, 4H), 7.23–7.16 (m, 2H), 4.52 (s, 2H), 2.38 (s, 3H);  $^{13}\text{C}\{^1\text{H}\}$  NMR (100 MHz,  $\text{CDCl}_3$ )  $\delta$  142.0, 138.6, 137.9, 133.3, 132.6, 132.4, 131.3, 130.7, 128.9, 128.3, 128.1, 128.0, 127.8, 127.5, 126.5, 126.3, 44.7, 21.3; IR (KBr):  $\nu_{\text{max}}$  3053, 2922, 1609, 1496, 1444, 1378, 1262, 891, 859, 820, 740  $\text{cm}^{-1}$ ; HRMS (EI)  $m/z$ :  $[\text{M}]^+$  Calcd for  $\text{C}_{18}\text{H}_{15}\text{Cl}$  266.0862; Found 266.0857.

**(E)-2,5-Dimethyl-4-(prop-1-en-1-yl)-1,1'-biphenyl (2a)**

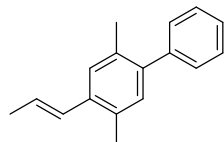

2a

Yellow solid (40.0 mg, 60% yield), M. p. = 59-60 °C;  $^1\text{H}$  NMR (400 MHz,  $\text{CDCl}_3$ )  $\delta$  7.48–7.39 (m, 2H), 7.37–7.33 (m, 4H), 7.05 (s, 1H), 6.63 (dd,  $J = 15.8, 2.0$  Hz, 1H), 6.19 (dq,  $J = 15.4, 6.5$  Hz, 1H), 2.36 (s, 3H), 2.28 (s, 3H), 1.96 (dd,  $J = 6.7, 1.7$  Hz, 3H);  $^{13}\text{C}\{^1\text{H}\}$  NMR (100 MHz,  $\text{CDCl}_3$ )  $\delta$  141.9, 140.4, 136.0, 132.7, 132.2, 131.7, 129.2, 128.6, 128.1, 127.4, 126.9, 126.7, 20.1, 19.3, 18.9; IR (KBr):  $\nu_{\text{max}}$  2925, 1618, 1447, 1325, 1166, 1127, 1068, 963, 847, 696  $\text{cm}^{-1}$ ; HRMS (EI)  $m/z$ :  $[\text{M}]^+$  Calcd for  $\text{C}_{17}\text{H}_{18}$  222.1409; Found 222.1402.

**(E)-4'-Fluoro-2,5-dimethyl-4-(prop-1-en-1-yl)-1,1'-biphenyl (2b)**

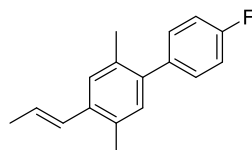

2b

Brown oil (43.2 mg, 60% yield);  $^1\text{H}$  NMR (400 MHz,  $\text{CDCl}_3$ )  $\delta$  7.39–7.27 (m, 3H), 7.18–7.07 (m, 2H), 7.01 (s, 1H), 6.63 (dd,  $J = 15.6, 1.8$  Hz, 1H), 6.19 (dq,  $J = 15.6, 6.6$  Hz, 1H), 2.36 (s, 3H), 2.25 (s, 3H), 1.96 (dd,  $J = 6.6, 1.8$  Hz, 3H);  $^{13}\text{C}\{^1\text{H}\}$  NMR (100 MHz,  $\text{CDCl}_3$ )  $\delta$  161.9 (d,  $J = 245.2$  Hz), 139.3, 137.8 (d,  $J = 3.2$  Hz), 136.1, 132.7, 132.3, 131.7, 130.7 (d,  $J = 7.9$  Hz), 128.4, 127.4, 127.0, 114.9 (d,  $J = 21.2$  Hz), 20.0, 19.3, 18.9;  $^{19}\text{F}$  NMR (376 MHz,  $\text{CDCl}_3$ )  $\delta$  -116.34; IR (neat):  $\nu_{\text{max}}$  2925, 1652, 1605, 1509, 1489, 1447, 1222, 1157, 963, 839, 699  $\text{cm}^{-1}$ ; HRMS (EI)  $m/z$ :  $[\text{M}]^+$  Calcd for  $\text{C}_{17}\text{H}_{17}\text{F}$  240.1314; Found 240.1308.

**(E)-4'-Chloro-2,5-dimethyl-4-(prop-1-en-1-yl)-1,1'-biphenyl (2c)**

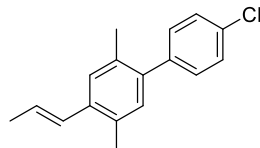

2c

White solid (44.6 mg, 58% yield), M. p. = 60-61 °C;  $^1\text{H}$  NMR (400 MHz,  $\text{CDCl}_3$ )  $\delta$  7.38–7.33 (m, 2H), 7.29 (s, 1H), 7.26–7.20 (m, 2H), 6.96 (s, 1H), 6.58 (dd,  $J = 15.7, 1.9$  Hz, 1H), 6.15 (dq,  $J = 15.6, 6.6$  Hz, 1H), 2.31 (s, 3H), 2.21 (s, 3H), 1.92 (dd,  $J = 6.6, 1.8$  Hz, 3H);  $^{13}\text{C}\{^1\text{H}\}$  NMR (100 MHz,  $\text{CDCl}_3$ )  $\delta$  140.3, 139.1, 136.3, 132.7, 132.6, 132.3, 131.5, 130.5, 128.5, 128.2, 127.5, 127.1, 20.0, 19.2, 18.8; IR (KBr):  $\nu_{\text{max}}$

2922, 2069, 1652, 1483, 1445, 1266, 1090, 1013, 962, 834, 747, 692  $\text{cm}^{-1}$ ; HRMS (EI)  $m/z$ :  $[M]^+$  Calcd for  $\text{C}_{17}\text{H}_{17}\text{Cl}$  256.1019; Found 256.1012.

**(E)-4'-Bromo-2,5-dimethyl-4-(prop-1-en-1-yl)-1,1'-biphenyl (2d)**

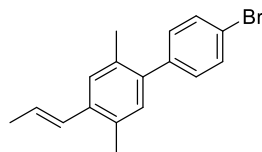

2d

White solid (51.3 mg, 57% yield); M. p. = 73-74  $^{\circ}\text{C}$ ;  $^1\text{H}$  NMR (400 MHz,  $\text{CDCl}_3$ )  $\delta$  7.58–7.51 (m, 2H), 7.33 (s, 1H), 7.24–7.18 (m, 2H), 6.99 (s, 1H), 6.61 (dd,  $J$  = 15.6, 1.8 Hz, 1H), 6.19 (dq,  $J$  = 15.6, 6.6 Hz, 1H), 2.34 (s, 3H), 2.25 (s, 3H), 1.95 (dd,  $J$  = 6.6, 1.8 Hz, 3H);  $^{13}\text{C}\{^1\text{H}\}$  NMR (100 MHz,  $\text{CDCl}_3$ )  $\delta$  140.7, 139.0, 136.3, 132.5, 132.3, 131.4, 131.2, 130.9, 128.4, 127.5, 127.2, 120.8, 20.0, 19.2, 18.9; IR (KBr):  $\nu_{\text{max}}$  2925, 1646, 1480, 1442, 1267, 1070, 1011, 962, 698  $\text{cm}^{-1}$ ; HRMS (EI)  $m/z$ :  $[M]^+$  Calcd for  $\text{C}_{17}\text{H}_{17}\text{Br}$  300.0514; Found 300.0506.

**(E)-2,4',5-Trimethyl-4-(prop-1-en-1-yl)-1,1'-biphenyl (2e)**

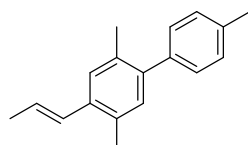

2e

White solid (43.9 mg, 62% yield); M. p. = 59-60  $^{\circ}\text{C}$ ;  $^1\text{H}$  NMR (400 MHz,  $\text{CDCl}_3$ )  $\delta$  7.32 (s, 1H), 7.25–7.19 (m, 4H), 7.02 (s, 1H), 6.62 (dd,  $J$  = 15.7, 2.0 Hz, 1H), 6.17 (dq,  $J$  = 15.6, 6.6 Hz, 1H), 2.41 (s, 3H), 2.34 (s, 3H), 2.26 (s, 3H), 1.94 (dd,  $J$  = 6.6, 1.8 Hz, 3H);  $^{13}\text{C}\{^1\text{H}\}$  NMR (100 MHz,  $\text{CDCl}_3$ )  $\delta$  140.3, 138.9, 136.2, 135.8, 132.7, 132.1, 131.7, 129.1, 128.7, 128.6, 127.4, 126.8, 21.2, 20.1, 19.3, 18.9; IR (KBr):  $\nu_{\text{max}}$  3020, 2922, 2853, 1650, 1489, 1446, 1377, 962, 889, 815  $\text{cm}^{-1}$ ; HRMS (EI)  $m/z$ :  $[M]^+$  Calcd for  $\text{C}_{18}\text{H}_{20}$  236.1565; Found 236.1556.

**(E)-4'-Methoxy-2,5-dimethyl-4-(prop-1-en-1-yl)-1,1'-biphenyl (2f)**

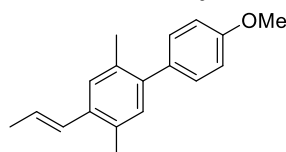

2f

Brown oil (31.8 mg, 42% yield);  $^1\text{H}$  NMR (400 MHz,  $\text{CDCl}_3$ )  $\delta$  7.29 (s, 1H), 7.26–7.22 (m, 2H), 6.99 (s, 1H), 6.96–6.90 (m, 2H), 6.58 (dd,  $J$  = 15.5, 1.8 Hz, 1H), 6.14 (dq,  $J$  = 15.6, 6.6 Hz, 1H), 3.84 (s, 3H), 2.31 (s, 3H), 2.24 (s, 3H), 1.91 (dd,  $J$  = 6.6, 1.8 Hz, 3H);  $^{13}\text{C}\{^1\text{H}\}$  NMR (100 MHz,  $\text{CDCl}_3$ )  $\delta$  158.4, 140.0, 135.7, 134.3, 132.8, 132.2, 131.8, 130.2, 128.6, 127.4, 126.7, 113.5, 113.4, 55.3, 20.1, 19.3, 18.9; IR (neat):  $\nu_{\text{max}}$  2954, 1609, 1518, 1489, 1460, 1287, 1247, 1175, 1038, 965, 835  $\text{cm}^{-1}$ ; HRMS (EI)  $m/z$ :  $[M]^+$  Calcd for  $\text{C}_{18}\text{H}_{20}\text{O}$  252.1514; Found 252.1505.

**(E)-2,5-Dimethyl-4-(prop-1-en-1-yl)-4'-(trifluoromethoxy)-1,1'-biphenyl (2g)**

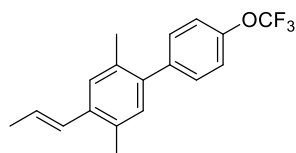

2g

Brown oil (50.5 mg, 55% yield);  $^1\text{H}$  NMR (400 MHz,  $\text{CDCl}_3$ )  $\delta$  7.37–7.29 (m, 3H), 7.25–7.21 (m, 2H), 6.98 (s, 1H), 6.59 (dd,  $J = 15.6, 1.9$  Hz, 1H), 6.16 (dq,  $J = 15.6, 6.6$  Hz, 1H), 2.32 (s, 3H), 2.22 (s, 3H), 1.92 (dd,  $J = 6.6, 1.8$  Hz, 3H);  $^{13}\text{C}\{^1\text{H}\}$  NMR (100 MHz,  $\text{CDCl}_3$ )  $\delta$  148.1, 140.6, 138.9, 136.4, 132.6, 132.3, 131.6, 130.5, 128.4, 127.5, 127.2, 120.5, 19.9, 19.2, 18.8.;  $^{19}\text{F}$  NMR (376 MHz,  $\text{CDCl}_3$ )  $\delta$  -57.79; IR (neat):  $\nu_{\text{max}}$  2923, 2855, 1636, 1490, 1444, 1258, 1222, 1165, 964, 750, 696  $\text{cm}^{-1}$ ; HRMS (EI)  $m/z$ :  $[\text{M}]^+$  Calcd for  $\text{C}_{18}\text{H}_{17}\text{F}_3\text{O}$  306.1231; Found 306.1222.

**(E)-2',5'-Dimethyl-4'-(prop-1-en-1-yl)-[1,1'-biphenyl]-4-carbonitrile (2h)**

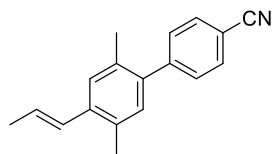

2h

White solid (25.9 mg, 35% yield); M. p. = 82–83  $^{\circ}\text{C}$ ;  $^1\text{H}$  NMR (400 MHz,  $\text{CDCl}_3$ )  $\delta$  7.78–7.68 (m, 2H), 7.50–7.42 (m, 2H), 7.35 (s, 1H), 7.00 (s, 1H), 6.62 (dd,  $J = 15.6, 2.2$  Hz, 1H), 6.21 (dq,  $J = 13.1, 6.3$  Hz, 1H), 2.36 (s, 3H), 2.25 (s, 3H), 1.96 (dd,  $J = 6.7, 1.9$  Hz, 3H);  $^{13}\text{C}\{^1\text{H}\}$  NMR (100 MHz,  $\text{CDCl}_3$ )  $\delta$  146.7, 138.3, 137.0, 132.6, 132.4, 131.9, 131.3, 130.0, 128.2, 127.7, 119.1, 110.5, 19.9, 19.3, 18.9; IR (KBr):  $\nu_{\text{max}}$  2226, 1652, 1488, 1446, 1390, 1262, 1035, 964, 688  $\text{cm}^{-1}$ ; HRMS (EI)  $m/z$ :  $[\text{M}]^+$  Calcd for  $\text{C}_{18}\text{H}_{17}\text{N}$  247.1361; Found 247.1354.

**Methyl (E)-2',5'-Dimethyl-4'-(prop-1-en-1-yl)-[1,1'-biphenyl]-4-carboxylate (2i)**

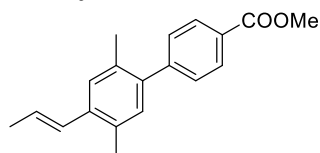

2i

White solid (49.6 mg, 59% yield); M. p. = 74–75  $^{\circ}\text{C}$ ;  $^1\text{H}$  NMR (400 MHz,  $\text{CDCl}_3$ )  $\delta$  7.99 (d,  $J = 8.3$  Hz, 2H), 7.34–7.29 (m, 2H), 7.24 (s, 1H), 6.92 (s, 1H), 6.51 (dd,  $J = 15.6, 1.8$  Hz, 1H), 6.09 (dq,  $J = 15.7, 6.6$  Hz, 1H), 3.86 (s, 3H), 2.25 (s, 3H), 2.15 (s, 3H), 1.85 (dd,  $J = 6.6, 1.8$  Hz, 3H);  $^{13}\text{C}\{^1\text{H}\}$  NMR (100 MHz,  $\text{CDCl}_3$ )  $\delta$  167.1, 146.7, 139.2, 136.6, 132.5, 132.4, 131.4, 129.5, 129.4, 129.3, 128.4, 127.6, 127.3, 52.1, 20.0, 19.2, 18.9.; IR (KBr):  $\nu_{\text{max}}$  2950, 1719, 1608, 1435, 1276, 1178, 1102, 963, 860, 777, 712, 701  $\text{cm}^{-1}$ ; HRMS (EI)  $m/z$ :  $[\text{M}]^+$  Calcd for  $\text{C}_{19}\text{H}_{20}\text{O}_2$  280.1463; Found 280.1455.

**(E)-2,5-Dimethyl-4'-nitro-4-(prop-1-en-1-yl)-1,1'-biphenyl (2j)**

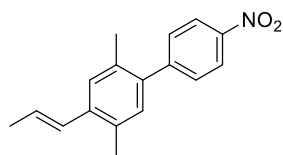

2j

Yellow solid (38% yield); M. p. = 63-64 °C;  $^1\text{H}$  NMR (400 MHz,  $\text{CDCl}_3$ )  $\delta$  8.33–8.24 (m, 2H), 7.54–7.47 (m, 2H), 7.37 (s, 1H), 7.02 (s, 1H), 6.62 (dd,  $J = 15.6, 1.8$  Hz, 1H), 6.22 (dq,  $J = 15.6, 6.6$  Hz, 1H), 2.36 (s, 3H), 2.27 (s, 3H), 1.96 (dd,  $J = 6.6, 1.8$  Hz, 3H);  $^{13}\text{C}\{^1\text{H}\}$  NMR (100 MHz,  $\text{CDCl}_3$ )  $\delta$  148.8, 146.7, 137.9, 137.2, 132.6, 132.4, 131.3, 130.1, 128.2, 127.8, 127.7, 123.4, 20.0, 19.3, 18.9; IR (KBr):  $\nu_{\text{max}}$  2923, 2852, 1646, 1515, 1484, 1447, 1343, 1106, 964, 854, 703  $\text{cm}^{-1}$ ; HRMS (EI)  $m/z$ :  $[\text{M}]^+$  Calcd for  $\text{C}_{17}\text{H}_{17}\text{NO}_2$  267.1259; Found 267.1253.

**(E)-2,5-Dimethyl-4-(prop-1-en-1-yl)-4'-(trifluoromethyl)-1,1'-biphenyl (2k)**

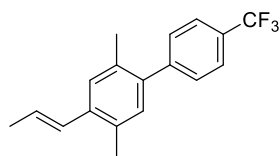

2k

Brown oil (37.4 mg, 43% yield);  $^1\text{H}$  NMR (400 MHz,  $\text{CDCl}_3$ )  $\delta$  7.68 (d,  $J = 8.1$  Hz, 2H), 7.46 (d,  $J = 8.0$  Hz, 2H), 7.35 (s, 1H), 7.01 (s, 1H), 6.62 (dd,  $J = 15.6, 1.8$  Hz, 1H), 6.20 (dq,  $J = 15.6, 6.6$  Hz, 1H), 2.36 (s, 3H), 2.26 (s, 3H), 1.96 (dd,  $J = 6.6, 1.8$  Hz, 3H);  $^{13}\text{C}\{^1\text{H}\}$  NMR (100 MHz,  $\text{CDCl}_3$ )  $\delta$  145.6, 138.9, 136.7, 132.6, 132.4, 131.5, 129.5, 128.8 (q,  $J = 32.4$  Hz), 128.4, 127.6, 127.4, 125.0 (q,  $J = 3.8$  Hz), 124.37 (q,  $J = 272.1$  Hz), 77.3, 77.0, 76.7, 19.9, 19.2, 18.9;  $^{19}\text{F}$  NMR (376 MHz,  $\text{CDCl}_3$ )  $\delta$  -62.33; IR (neat):  $\nu_{\text{max}}$  2956, 2921, 1635, 1485, 1443, 1377, 1261, 1011, 963, 698  $\text{cm}^{-1}$ ; HRMS (EI)  $m/z$ :  $[\text{M}]^+$  Calcd for  $\text{C}_{18}\text{H}_{17}\text{F}_3$  290.1282; Found 290.1275.

**(E)-2,2',5,6'-Tetramethyl-4-(prop-1-en-1-yl)-1,1'-biphenyl (2l)**

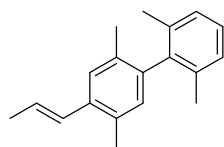

2l

Brown oil (45.8 mg, 61% yield);  $^1\text{H}$  NMR (400 MHz,  $\text{CDCl}_3$ )  $\delta$  7.36 (s, 1H), 7.28 (s, 1H), 7.21–7.07 (m, 3H), 6.81 (s, 1H), 6.65 (dd,  $J = 15.6, 2.0$  Hz, 1H), 6.21 (dq,  $J = 15.7, 6.5$  Hz, 1H), 2.34 (s, 3H), 1.99 (s, 6H), 1.95 (s, 3H);  $^{13}\text{C}\{^1\text{H}\}$  NMR (100 MHz,  $\text{CDCl}_3$ )  $\delta$  141.1, 139.1, 136.0, 135.4, 133.0, 132.3, 130.6, 128.7, 127.1, 126.8, 126.2, 77.2, 20.4, 19.4, 19.0, 18.9; IR (neat):  $\nu_{\text{max}}$  3018, 2922, 2854, 1650, 1462, 1377, 1093, 1032, 963, 885, 768  $\text{cm}^{-1}$ ; HRMS (EI)  $m/z$ :  $[\text{M}]^+$  Calcd for  $\text{C}_{19}\text{H}_{22}$  250.1722; Found 250.1714.

**(E)-1,2,4-Trimethyl-5-(prop-1-en-1-yl)benzene (2m)**

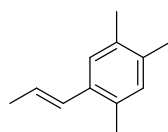

2m

Brown oil (26.9 mg, 56% yield).  $^1\text{H}$  NMR (400 MHz,  $\text{CDCl}_3$ )  $\delta$  7.17 (s, 1H), 6.89 (s, 1H), 6.53 (dd,  $J = 15.6, 1.9$  Hz, 1H), 6.06 (dq,  $J = 15.6, 6.6$  Hz, 1H), 2.26 (s, 3H), 2.21 (s, 3H), 2.20 (s, 3H), 1.88 (dd,  $J = 6.6, 1.8$  Hz, 3H);  $^{13}\text{C}\{^1\text{H}\}$  NMR (100 MHz,  $\text{CDCl}_3$ )  $\delta$  135.0, 134.4, 133.9, 132.1, 131.5, 128.7, 126.7, 125.8, 19.31, 19.27, 19.1, 18.8. IR (neat):  $\nu_{\text{max}}$  2919, 2862, 1647, 1502, 1459, 1377, 963, 870, 840, 803  $\text{cm}^{-1}$ ; HRMS (EI)  $m/z$ :  $[\text{M}]^+$  Calcd for  $\text{C}_{12}\text{H}_{16}$  160.1252; Found 160.1243.

**(E)-2-(2,5-Dimethyl-4-(prop-1-en-1-yl)phenyl)thiophene (2n)**

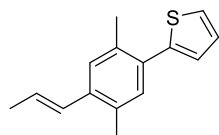

2n

Brown oil (39.0 mg, 57% yield);  $^1\text{H}$  NMR (400 MHz,  $\text{CDCl}_3$ )  $\delta$  7.28–7.25 (m, 1H), 7.22 (s, 1H), 7.14–7.10 (m, 1H), 7.09–7.06 (m, 1H), 7.01 (s, 1H), 6.50 (dd,  $J = 15.6, 1.8$  Hz, 1H), 6.07 (dq,  $J = 15.8, 6.7$  Hz, 1H), 2.23 (d,  $J = 3.2$  Hz, 6H), 1.84 (dd,  $J = 6.6, 1.8$  Hz, 3H);  $^{13}\text{C}\{^1\text{H}\}$  NMR (100 MHz,  $\text{CDCl}_3$ )  $\delta$  142.1, 136.0, 134.9, 133.0, 132.2, 131.5, 129.0, 128.5, 127.5, 126.9, 124.8, 122.3, 20.4, 19.2, 18.9; IR (neat):  $\nu_{\text{max}}$  2923, 1691, 1607, 1448, 1377, 1080, 1035, 964, 889, 857, 789, 723  $\text{cm}^{-1}$ ; HRMS (EI)  $m/z$ :  $[\text{M}]^+$  Calcd for  $\text{C}_{15}\text{H}_{16}\text{S}$  228.0973; Found 228.0966.

**(E)-2-(2,5-Dimethyl-4-(prop-1-en-1-yl)phenyl)naphthalene (2o)**

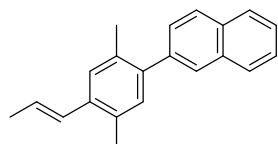

2o

Brown oil (50.6 mg, 62% yield);  $^1\text{H}$  NMR (400 MHz,  $\text{CDCl}_3$ )  $\delta$  7.89–7.82 (m, 3H), 7.76 (s, 1H), 7.50–7.44 (m, 3H), 7.34 (s, 1H), 7.10 (s, 1H), 6.62 (dd,  $J = 15.6, 1.8$  Hz, 1H), 6.17 (dq,  $J = 15.6, 6.6$  Hz, 1H), 2.34 (s, 3H), 2.27 (s, 3H), 1.93 (dd,  $J = 6.6, 1.8$  Hz, 3H);  $^{13}\text{C}\{^1\text{H}\}$  NMR (100 MHz,  $\text{CDCl}_3$ )  $\delta$  140.3, 139.5, 136.1, 133.4, 132.9, 132.3, 131.9, 128.6, 128.0, 127.8, 127.73, 127.69, 127.5, 127.4, 127.0, 126.1, 125.8, 77.3, 20.1, 19.3, 18.9; IR (neat):  $\nu_{\text{max}}$  3053, 3016, 2923, 2852, 1631, 1495, 1445, 1377, 1267, 1131, 963, 857, 820, 749  $\text{cm}^{-1}$ ; HRMS (EI)  $m/z$ :  $[\text{M}]^+$  Calcd for  $\text{C}_{21}\text{H}_{20}$  272.1565; Found 272.1558.

**2-(2,5-Dimethyl-[1,1'-biphenyl]-4-yl)-3-methyloxirane (2a-1)**

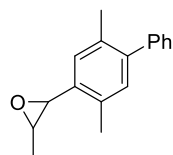

2a-1

White solid (35.0 mg, 49% yield); M. p. = 68–69  $^{\circ}\text{C}$ ;  $^1\text{H}$  NMR (400 MHz,  $\text{CDCl}_3$ )  $\delta$  7.46–7.40 (m, 2H), 7.38 (d,  $J = 6.9$  Hz, 1H), 7.39–7.36 (m, 2H), 7.09 (s, 1H), 7.02 (s, 1H), 3.78 (s, 1H), 2.98 (qd,  $J = 5.3, 2.2$  Hz, 1H), 2.35 (s, 3H), 2.26 (s, 3H), 1.53 (d,  $J = 5.1$  Hz, 3H);  $^{13}\text{C}\{^1\text{H}\}$  NMR (150 MHz,  $\text{CDCl}_3$ )  $\delta$  142.2, 141.9, 136.6, 135.2, 130.02, 129.97, 129.4, 128.1, 126.8, 124.1, 58.2, 58.0, 21.0, 18.0, 15.7; IR (neat):  $\nu_{\text{max}}$  2957,



2924, 2854, 1642, 1466, 1377, 1260, 1073, 1033, 860, 774, 702  $\text{cm}^{-1}$ ; HRMS (EI)  $m/z$ :  $[M]^+$  Calcd for  $\text{C}_{17}\text{H}_{18}\text{O}$  238.1358; Found 238.1351.

**2-Bromo-1-(2,5-dimethyl-[1,1'-biphenyl]-4-yl)propan-1-ol (2a-2)**

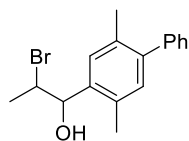

2a-2

Orange oil (61.1 mg, 64% yield);  $^1\text{H}$  NMR (400 MHz,  $\text{CDCl}_3$ )  $\delta$  7.47–7.40 (m, 3H), 7.39–7.35 (m, 1H), 7.35–7.31 (m, 2H), 7.06 (s, 1H), 5.29 (t,  $J = 3.2$  Hz, 1H), 4.46 (qd,  $J = 6.8, 3.5$  Hz, 1H), 2.47 (d,  $J = 3.0$  Hz, 1H), 2.36 (s, 3H), 2.29 (s, 3H), 1.70 (d,  $J = 6.8$  Hz, 3H);  $^{13}\text{C}\{^1\text{H}\}$  NMR (100 MHz,  $\text{CDCl}_3$ )  $\delta$  141.54, 141.46, 136.7, 133.1, 132.0, 129.1, 128.1, 127.9, 126.8, 74.4, 54.4, 20.2, 18.8, 18.7; IR (neat):  $\nu_{\text{max}}$  2931, 1601, 1487, 1444, 1376, 1191, 1127, 1073, 1020, 886, 770, 704  $\text{cm}^{-1}$ ; HRMS (EI)  $m/z$ :  $[M]^+$  Calcd for  $\text{C}_{17}\text{H}_{19}\text{BrO}$  318.0619; Found 318.0615.

**1-(2,5-Dimethyl-[1,1'-biphenyl]-4-yl)propane-1,2-dione (2a-3)**

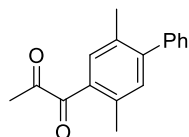

2a-3

Orange oil (28.7 mg, 38% yield);  $^1\text{H}$  NMR (400 MHz,  $\text{CDCl}_3$ )  $\delta$  7.43 (s, 1H), 7.38–7.34 (m, 2H), 7.33–7.30 (m, 1H), 7.25–7.23 (m, 1H), 7.23–7.21 (m, 1H), 7.10 (s, 1H), 2.48 (s, 3H), 2.47 (s, 3H), 2.19 (s, 3H);  $^{13}\text{C}\{^1\text{H}\}$  NMR (100 MHz,  $\text{CDCl}_3$ )  $\delta$  201.3, 194.6, 147.1, 140.6, 138.2, 134.0, 133.8, 133.0, 129.8, 128.8, 128.3, 127.6, 26.2, 21.0, 19.9; IR (neat):  $\nu_{\text{max}}$  2927, 2854, 1708, 1669, 1610, 1542, 1486, 1443, 1187, 1129, 956, 863, 760, 702  $\text{cm}^{-1}$ ; HRMS (EI)  $m/z$ :  $[M]^+$  Calcd for  $\text{C}_{17}\text{H}_{16}\text{O}_2$  252.1150; Found 252.1145.

**(E)-3-(2,5-Dimethyl-[1,1'-biphenyl]-4-yl)acrylonitrile (2a-4)**

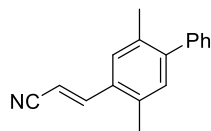

2a-4

Orange oil (37.7 mg, 54% yield);  $^1\text{H}$  NMR (400 MHz,  $\text{CDCl}_3$ )  $\delta$  7.69 (d,  $J = 16.6$  Hz, 1H), 7.46–7.39 (m, 2H), 7.38–7.34 (m, 2H), 7.32–7.26 (m, 2H), 7.09 (s, 1H), 5.83 (d,  $J = 16.5$  Hz, 1H), 2.39 (s, 3H), 2.25 (s, 3H);  $^{13}\text{C}\{^1\text{H}\}$  NMR (100 MHz,  $\text{CDCl}_3$ )  $\delta$  148.2, 144.8, 140.8, 134.6, 133.7, 132.5, 131.4, 128.9, 128.2, 127.5, 127.3, 118.6, 96.7, 20.0, 19.0; IR (neat):  $\nu_{\text{max}}$  3058, 3023, 2954, 2924, 2215, 1602, 1484, 1443, 963, 769, 703  $\text{cm}^{-1}$ ; HRMS (EI)  $m/z$ :  $[M]^+$  Calcd for  $\text{C}_{17}\text{H}_{15}\text{N}$  233.1204; Found 233.1198.

**(E)-3-(2,5-Dimethyl-[1,1'-biphenyl]-4-yl)acrylaldehyde (2a-5)**

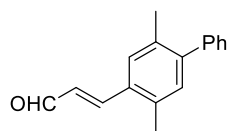

**2a-5**

Orange oil (46.7 mg, 66% yield);  $^1\text{H}$  NMR (400 MHz,  $\text{CDCl}_3$ )  $\delta$  9.66 (d,  $J = 7.7$  Hz, 1H), 7.70 (d,  $J = 15.8$  Hz, 1H), 7.43 (s, 1H), 7.38–7.32 (m, 2H), 7.31–7.27 (m, 1H), 7.26–7.21 (m, 2H), 7.05 (s, 1H), 6.64 (dd,  $J = 15.8, 7.7$  Hz, 1H), 2.40 (s, 3H), 2.20 (s, 3H);  $^{13}\text{C}\{^1\text{H}\}$  NMR (100 MHz,  $\text{CDCl}_3$ )  $\delta$  193.8, 150.1, 144.9, 141.0, 135.4, 133.7, 132.6, 131.7, 129.3, 128.9, 128.8, 128.2, 127.3, 20.0, 19.2; IR (neat):  $\nu_{\text{max}}$  2924, 1681, 1606, 1485, 1442, 1394, 1283, 1127, 970, 892, 769, 703, 692  $\text{cm}^{-1}$ ; HRMS (EI)  $m/z$ :  $[\text{M}]^+$  Calcd for  $\text{C}_{17}\text{H}_{16}\text{O}$  236.1201; Found 236.1196.

**5-Methyl-2-methylene-5-(prop-1-en-1-yl)-2,5-dihydro-1,1'-biphenyl (C)**

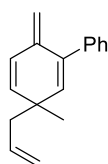

**C**

Colorless oil (0.62 g, 93% yield);  $^1\text{H}$  NMR (400 MHz,  $\text{CDCl}_3$ )  $\delta$  7.42–7.29 (m, 5H), 6.36 (d,  $J = 9.8$  Hz, 1H), 5.86–5.74 (m, 1H), 5.72 (d,  $J = 9.8$  Hz, 1H), 5.67–5.62 (m, 1H), 5.09 (s, 1H), 5.06 (dq,  $J = 9.2, 1.5$  Hz, 1H), 4.98 (s, 1H), 4.87 (s, 1H), 2.26 (s, 2H), 1.23 (s, 3H);  $^{13}\text{C}\{^1\text{H}\}$  NMR (100 MHz,  $\text{CDCl}_3$ )  $\delta$  140.7, 138.6, 137.33, 137.29, 136.2, 134.8, 129.1, 128.0, 127.4, 127.0, 117.2, 112.7, 77.4, 77.1, 76.7, 47.2, 40.2, 28.1; IR (neat):  $\nu_{\text{max}}$  2926, 1689, 1604, 1488, 1259, 1073, 991, 921, 822, 770, 701; HRMS (EI)  $m/z$ :  $[\text{M}]^+$  Calcd for  $\text{C}_{17}\text{H}_{18}$  222.1409; Found 222.1402.

**4-Allyl-2,5-dimethyl-1,1'-biphenyl (2a')**

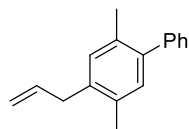

**2a'**

Colorless oil (60 mg, 90% yield);  $^1\text{H}$  NMR (400 MHz,  $\text{CDCl}_3$ )  $\delta$  7.38 (t,  $J = 7.4$  Hz, 2H), 7.31 (d,  $J = 7.2$  Hz, 3H), 7.04 (d,  $J = 4.3$  Hz, 2H), 6.04–5.92 (m, 1H), 5.19–4.98 (m, 2H), 3.38 (d,  $J = 6.4$  Hz, 2H), 2.28 (s, 3H), 2.22 (s, 3H);  $^{13}\text{C}\{^1\text{H}\}$  NMR (100 MHz,  $\text{CDCl}_3$ )  $\delta$  142.0, 139.9, 137.1, 136.7, 133.6, 132.8, 131.7, 131.2, 129.3, 128.0, 126.6, 115.8, 77.4, 77.1, 76.8, 37.5, 19.9, 18.8; IR (neat):  $\nu_{\text{max}}$  2921, 1637, 1601, 1487, 1442, 1072, 1031, 993, 912, 884, 765, 702; HRMS (EI)  $m/z$ :  $[\text{M}]^+$  Calcd for  $\text{C}_{17}\text{H}_{18}$  222.1409; Found 222.1402.

**4'-(chloromethyl)-1,1':3',1''-terphenyl (3a)**

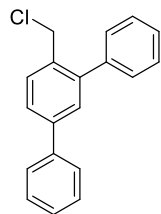

White solid (0.89 g, 64% yield); M. p. = 91-92 °C;  $^1\text{H}$  NMR (400 MHz,  $\text{CDCl}_3$ )  $\delta$  7.68–7.62 (m, 4H), 7.56 (s, 1H), 7.53–7.48 (m, 4H), 7.48–7.42 (m, 3H), 7.42–7.35 (m, 1H), 4.61 (s, 2H);  $^{13}\text{C}\{^1\text{H}\}$  NMR (100 MHz,  $\text{CDCl}_3$ )  $\delta$  142.5, 141.5, 140.3, 140.2, 133.9, 131.1, 129.2, 129.1, 128.9, 128.4, 127.7, 127.6, 127.2, 126.6, 44.3; IR (neat):  $\nu_{\text{max}}$  3058, 3028, 1600, 1442, 1263, 1027, 896, 853, 776, 753, 698, 672  $\text{cm}^{-1}$ ; HRMS (EI) m/z:  $[\text{M}]^+$  Calcd for  $\text{C}_{19}\text{H}_{15}\text{Cl}$  278.0862; Found 278.0857.

## 7. Copies of $^1\text{H}$ and $^{13}\text{C}$ NMR Spectra

### 1-(Chloromethyl)-4-ethylbenzene (1aa)

$^1\text{H}$  NMR, 400 MHz,  $\text{CDCl}_3$

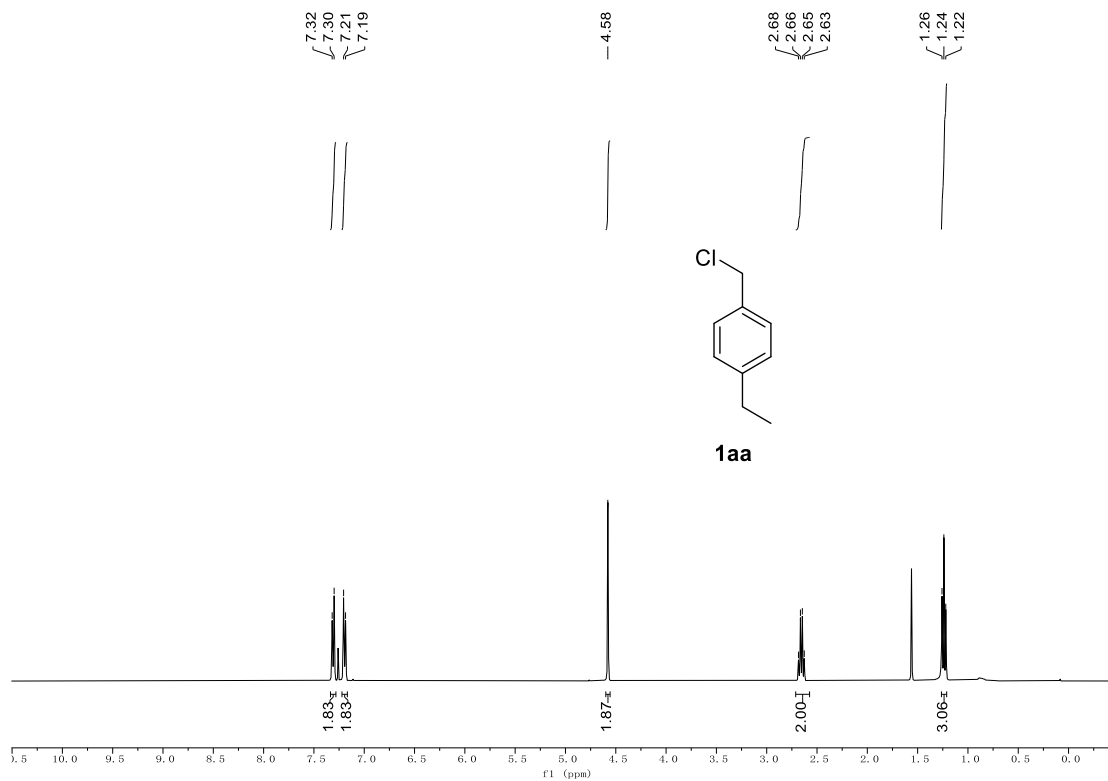

$^{13}\text{C}\{^1\text{H}\}$  NMR, 100 MHz,  $\text{CDCl}_3$

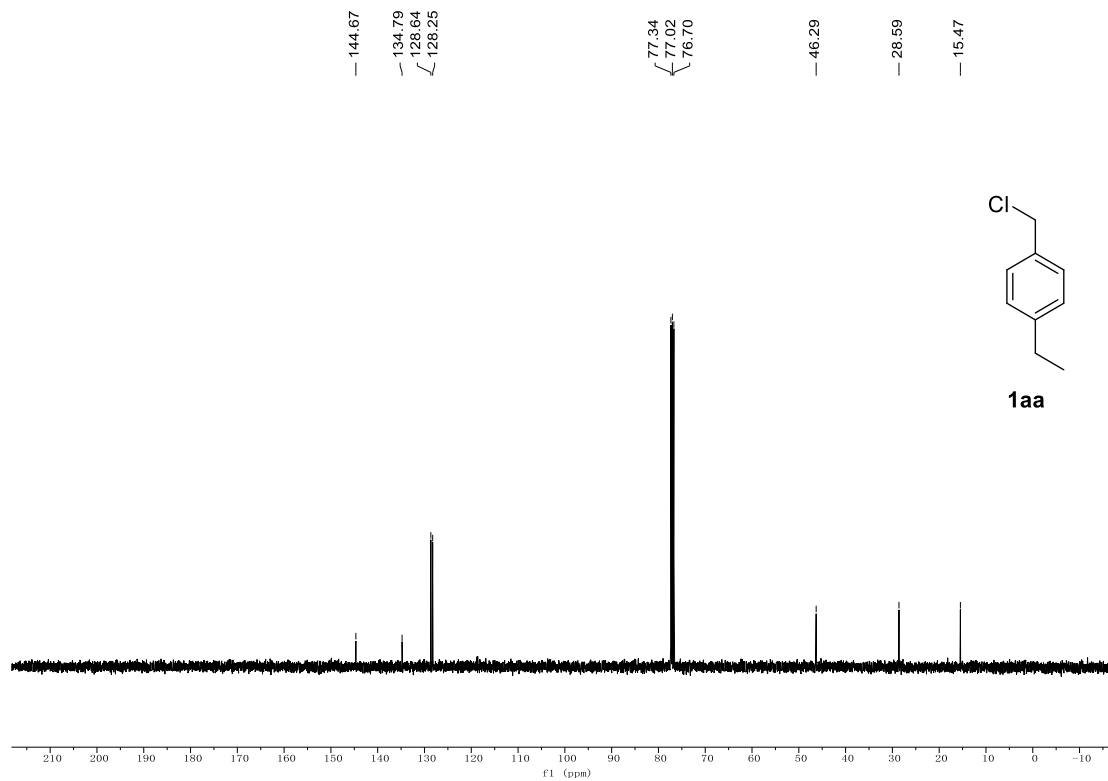

## 2-(Chloromethyl)-5-methyl-1,1'-biphenyl (1a)

$^1\text{H}$  NMR, 400 MHz,  $\text{CDCl}_3$

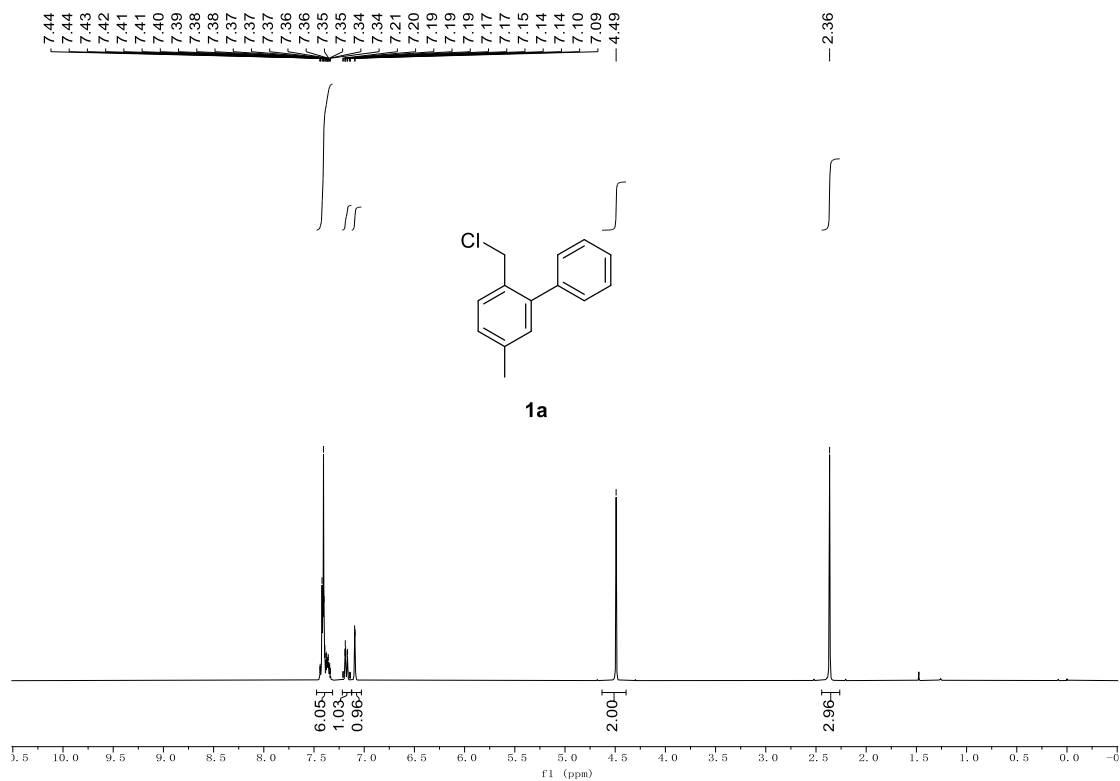

$^{13}\text{C}\{^1\text{H}\}$  NMR, 100 MHz,  $\text{CDCl}_3$

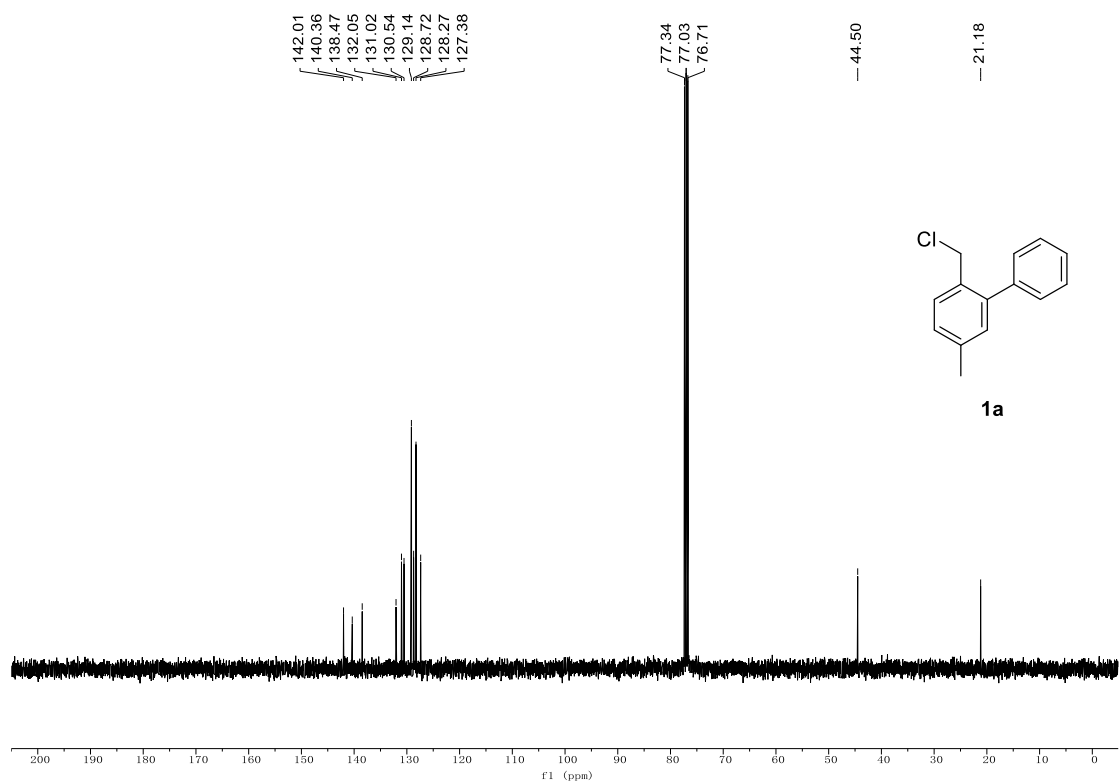

## 2-(Chloromethyl)-4'-fluoro-5-methyl-1,1'-biphenyl (1b)

$^1\text{H}$  NMR, 400 MHz,  $\text{CDCl}_3$

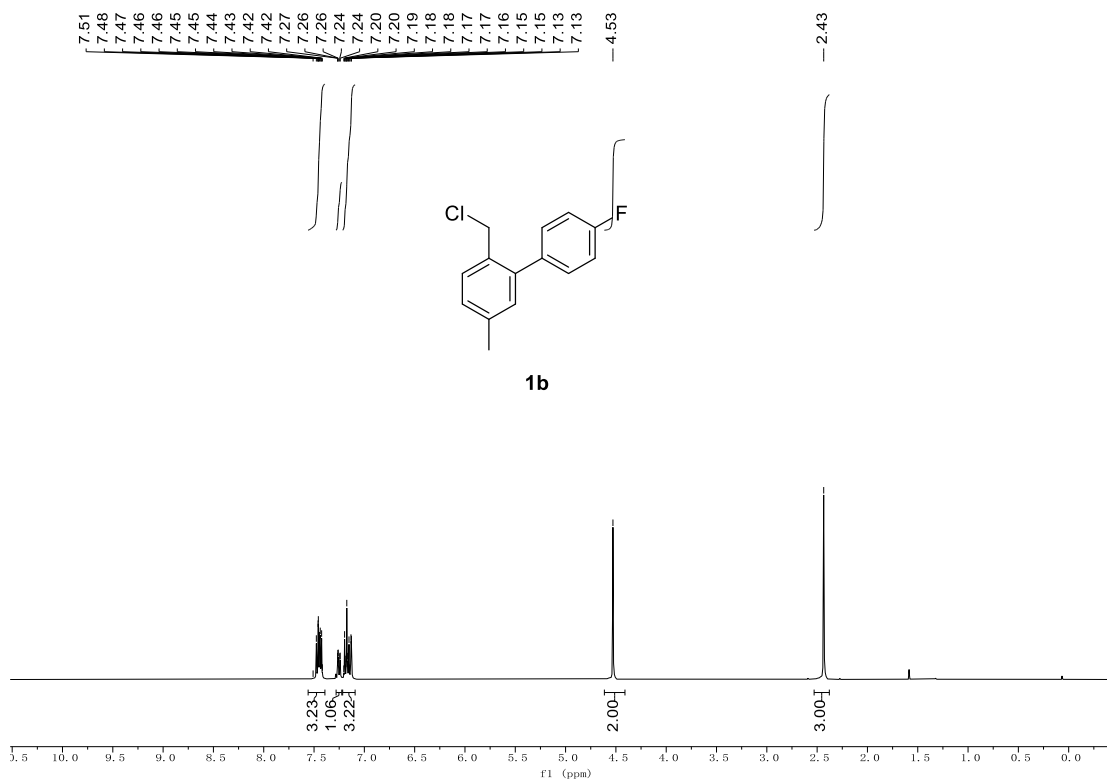

$^{13}\text{C}\{^1\text{H}\}$  NMR, 100 MHz,  $\text{CDCl}_3$

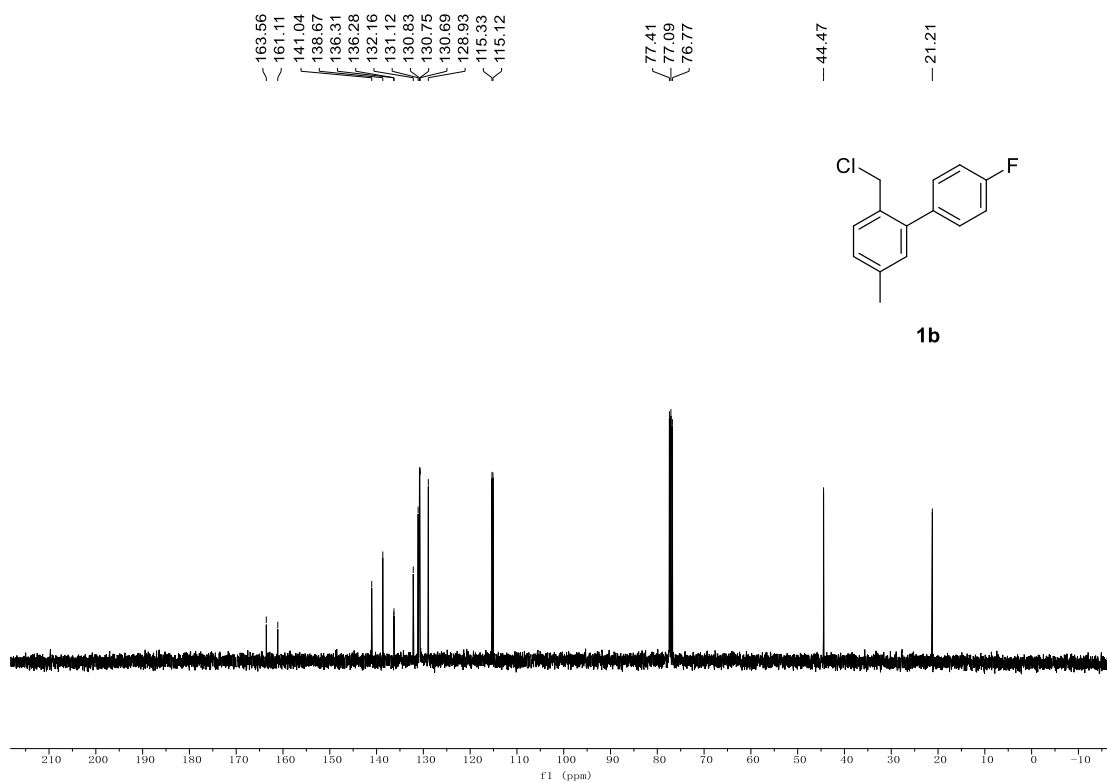

### 4'-Chloro-2-(chloromethyl)-5-methyl-1,1'-biphenyl (1c)

$^1\text{H}$  NMR, 400 MHz,  $\text{CDCl}_3$

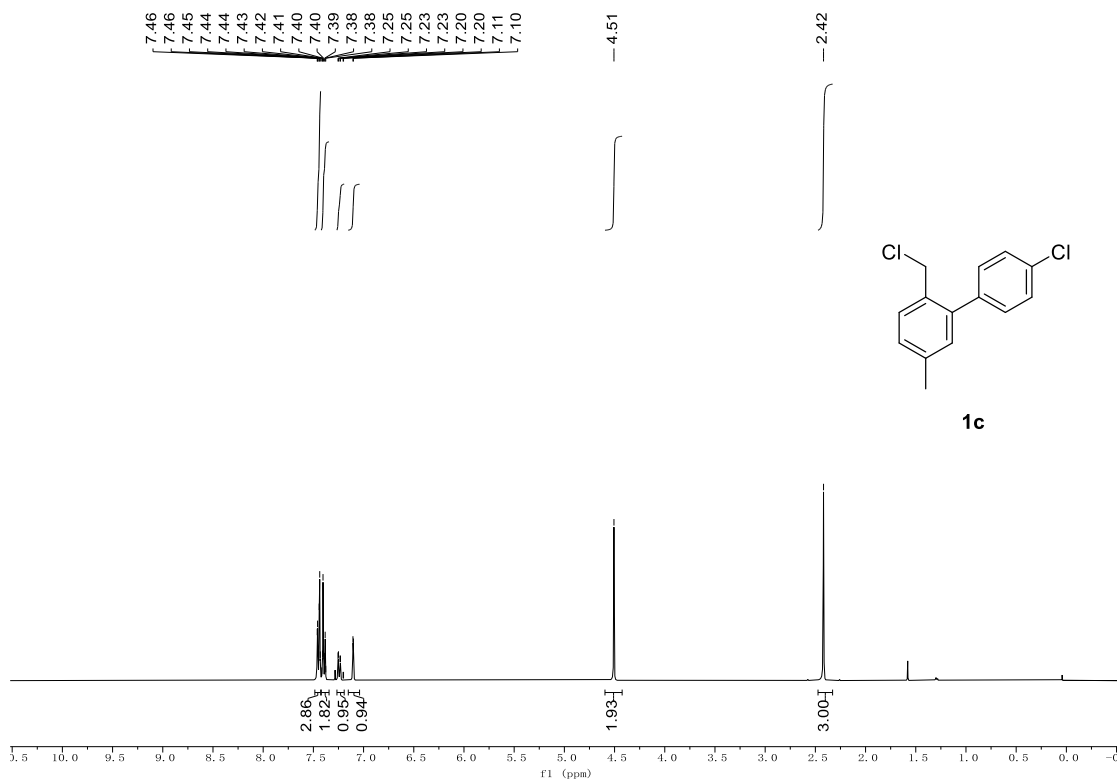

$^{13}\text{C}\{^1\text{H}\}$  NMR, 100 MHz,  $\text{CDCl}_3$

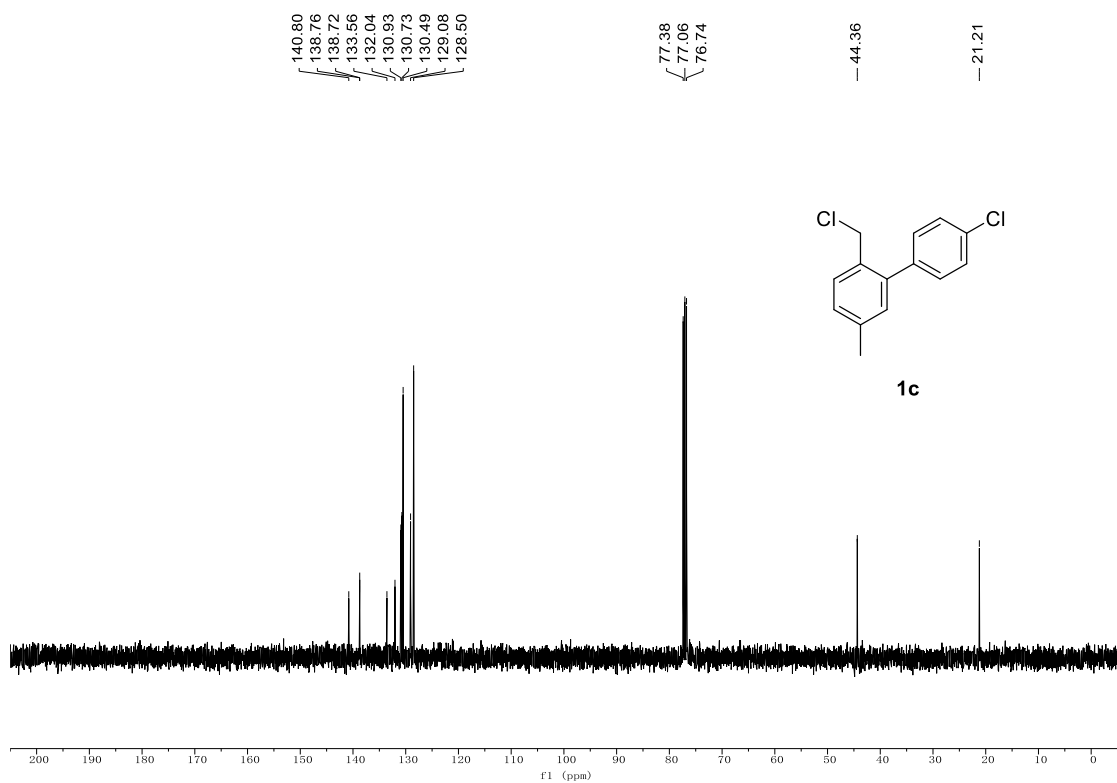

# 4'-Bromo-2-(chloromethyl)-5-methyl-1,1'-biphenyl (1d)

$^1\text{H}$  NMR, 400 MHz,  $\text{CDCl}_3$

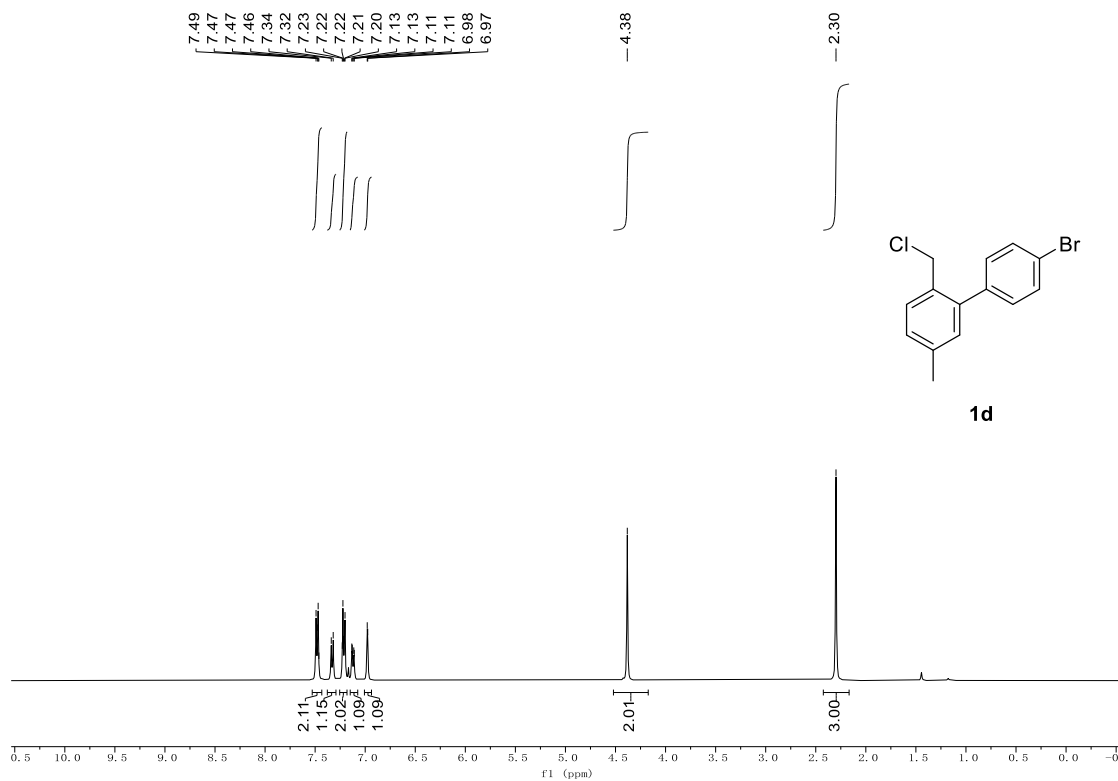

$^{13}\text{C}\{^1\text{H}\}$  NMR, 100 MHz,  $\text{CDCl}_3$

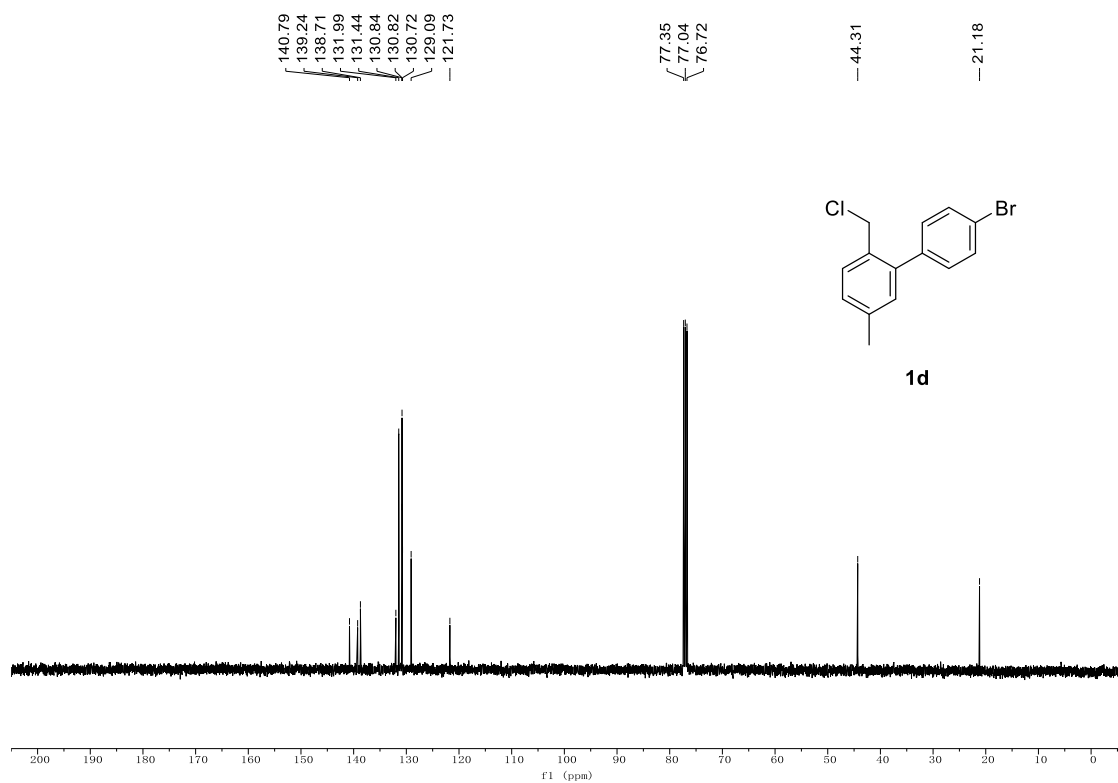



## 2-(Chloromethyl)-4',5-dimethyl-1,1'-biphenyl (1e)

$^1\text{H}$  NMR, 400 MHz,  $\text{CDCl}_3$

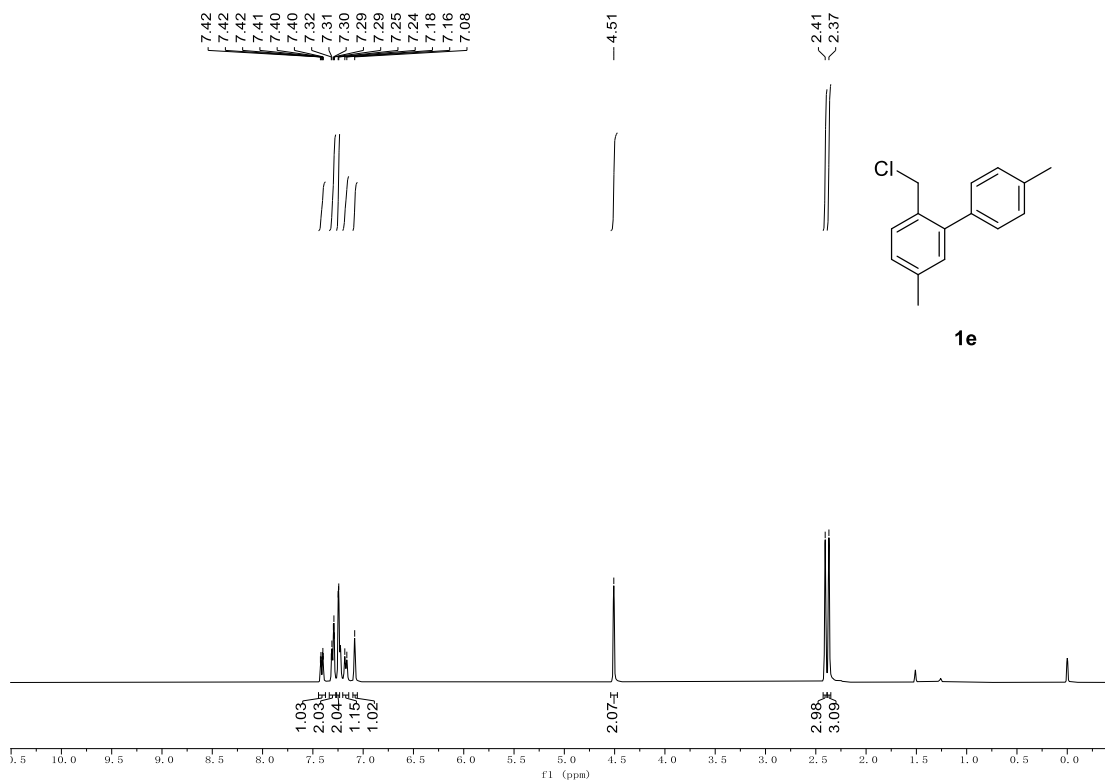

$^{13}\text{C}\{^1\text{H}\}$  NMR, 100 MHz,  $\text{CDCl}_3$

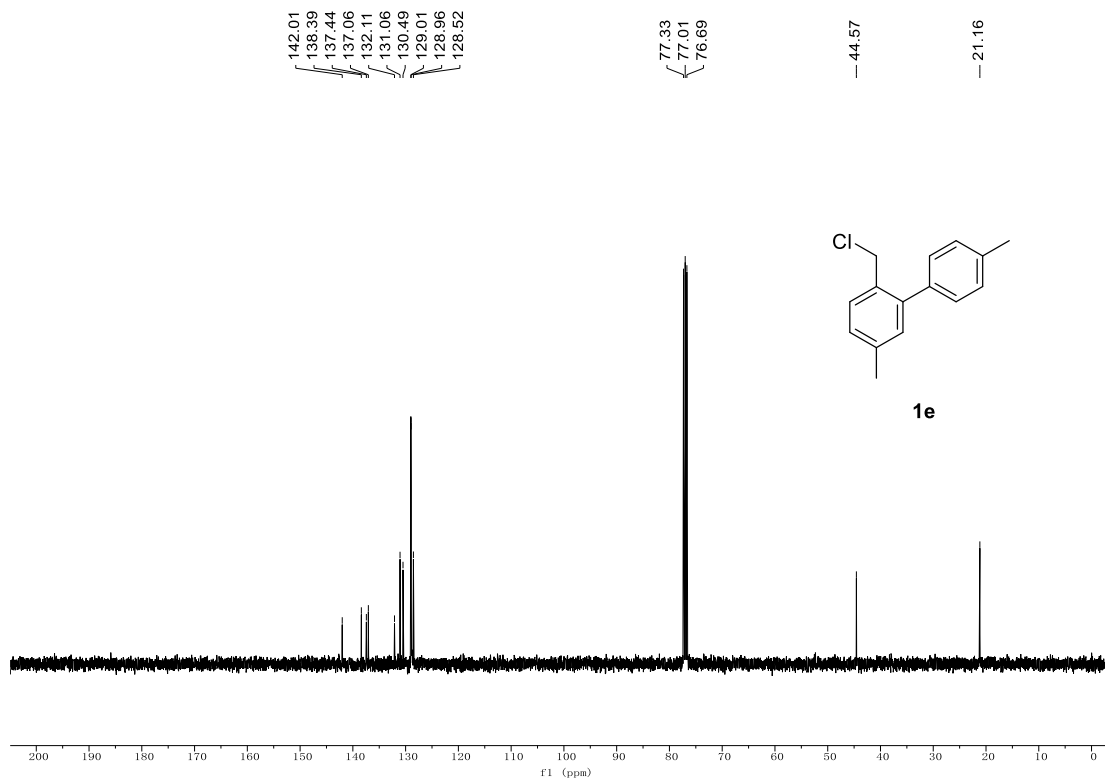

## 2-(Chloromethyl)-4'-methoxy-5-methyl-1,1'-biphenyl (1f)

$^1\text{H}$  NMR, 400 MHz,  $\text{CDCl}_3$

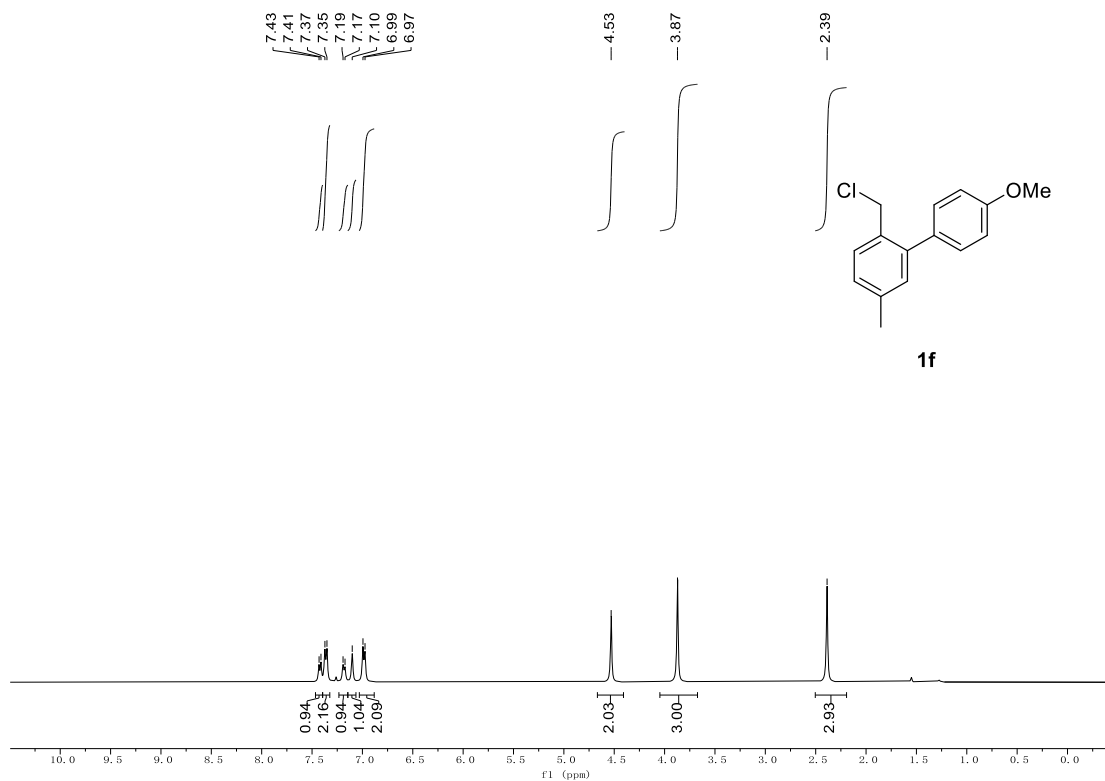

$^{13}\text{C}\{^1\text{H}\}$  NMR, 100 MHz,  $\text{CDCl}_3$

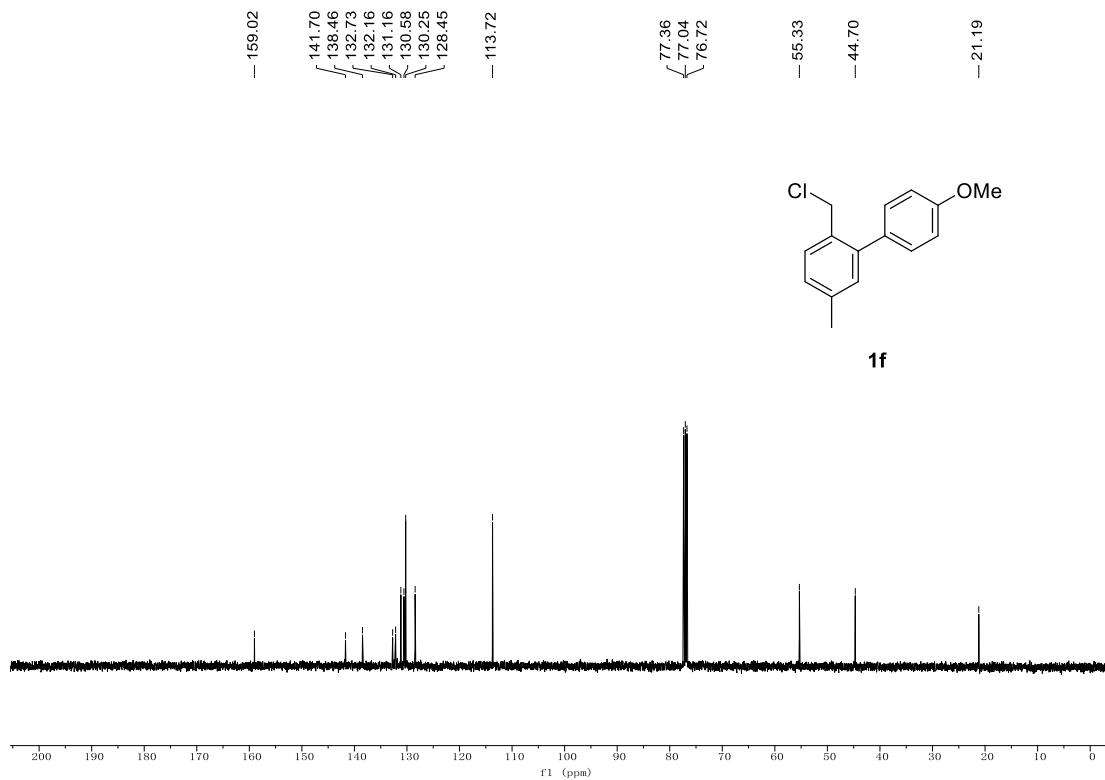

## 2-(Chloromethyl)-5-methyl-4'-(trifluoromethoxy)-1,1'-biphenyl (1g)

$^1\text{H}$  NMR, 400 MHz,  $\text{CDCl}_3$

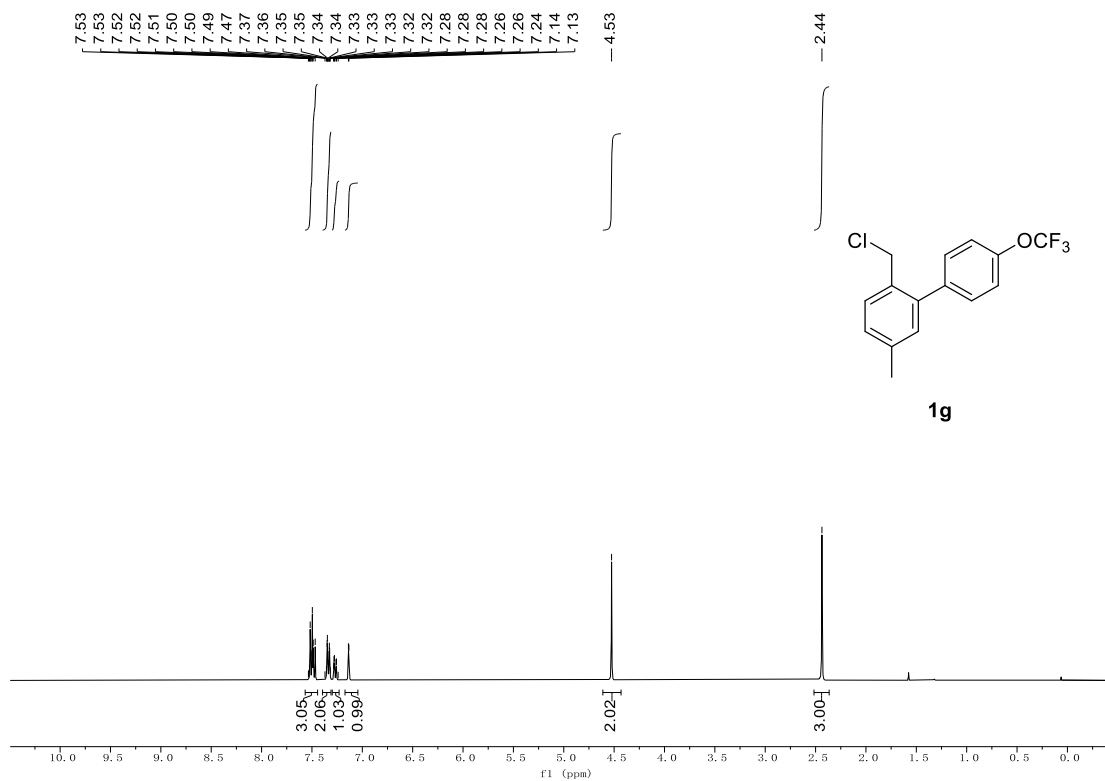

$^{13}\text{C}\{^1\text{H}\}$  NMR, 100 MHz,  $\text{CDCl}_3$

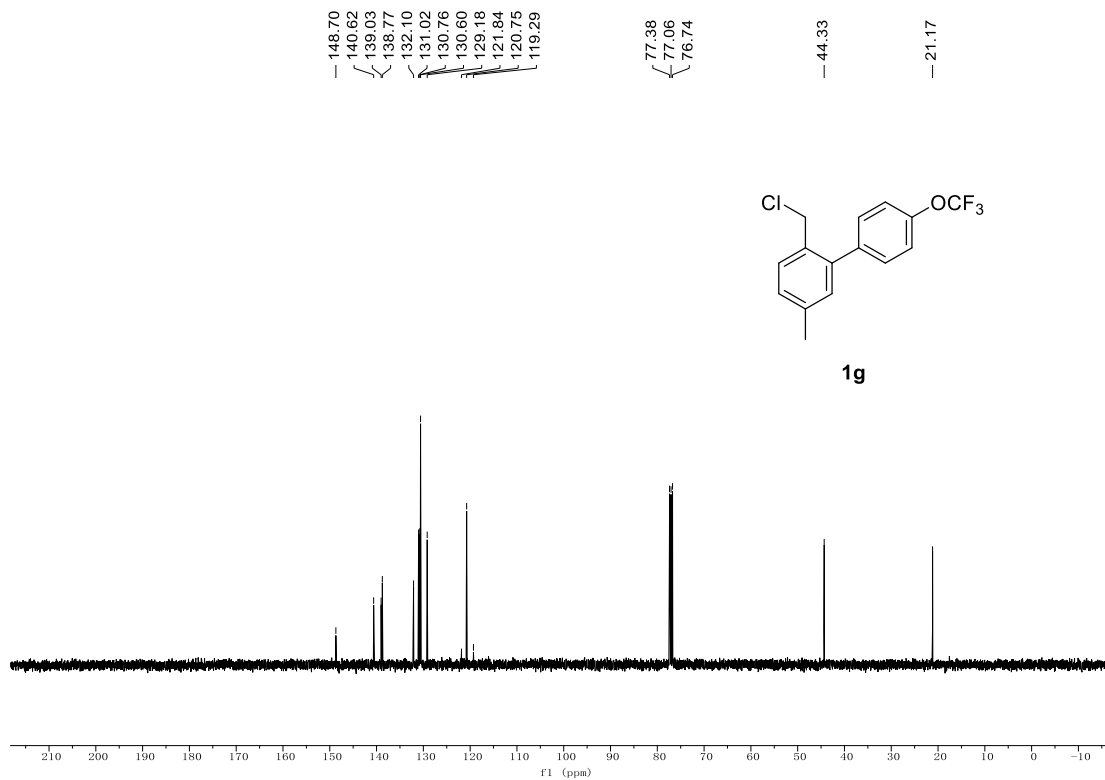

## 2'-(Chloromethyl)-5'-methyl-[1,1'-biphenyl]-4-carbonitrile (**1h**)

$^1\text{H}$  NMR, 400 MHz,  $\text{CDCl}_3$

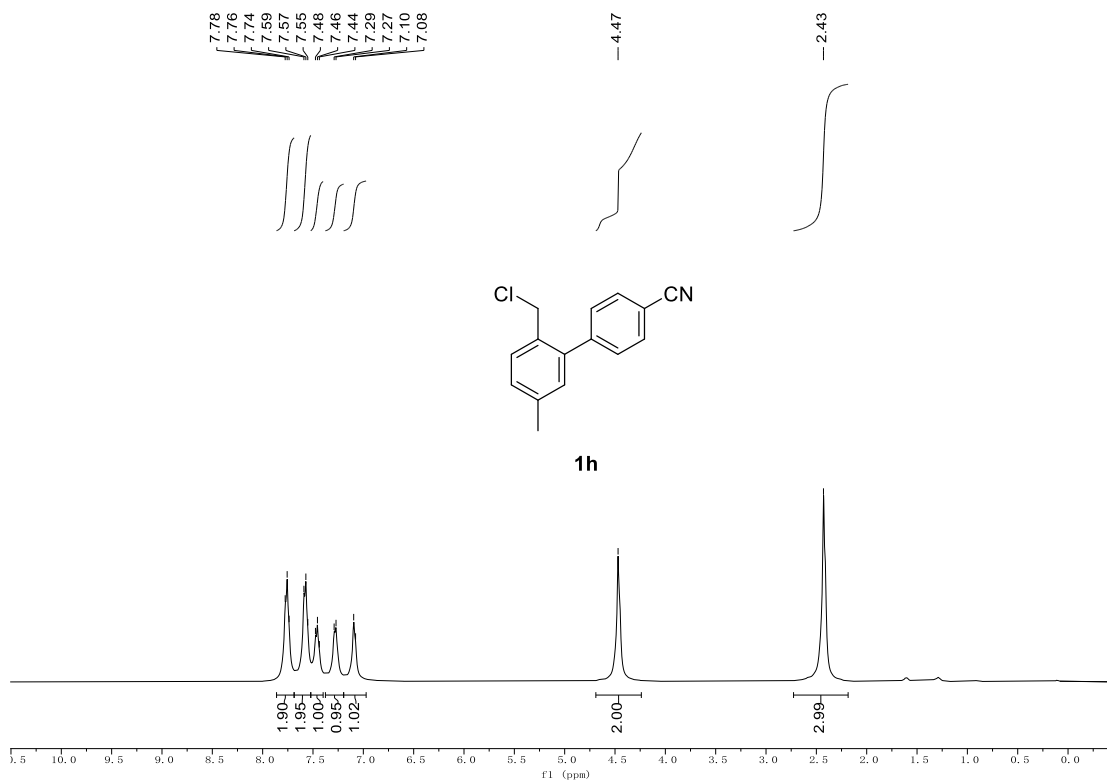

$^{13}\text{C}\{^1\text{H}\}$  NMR, 100 MHz,  $\text{CDCl}_3$

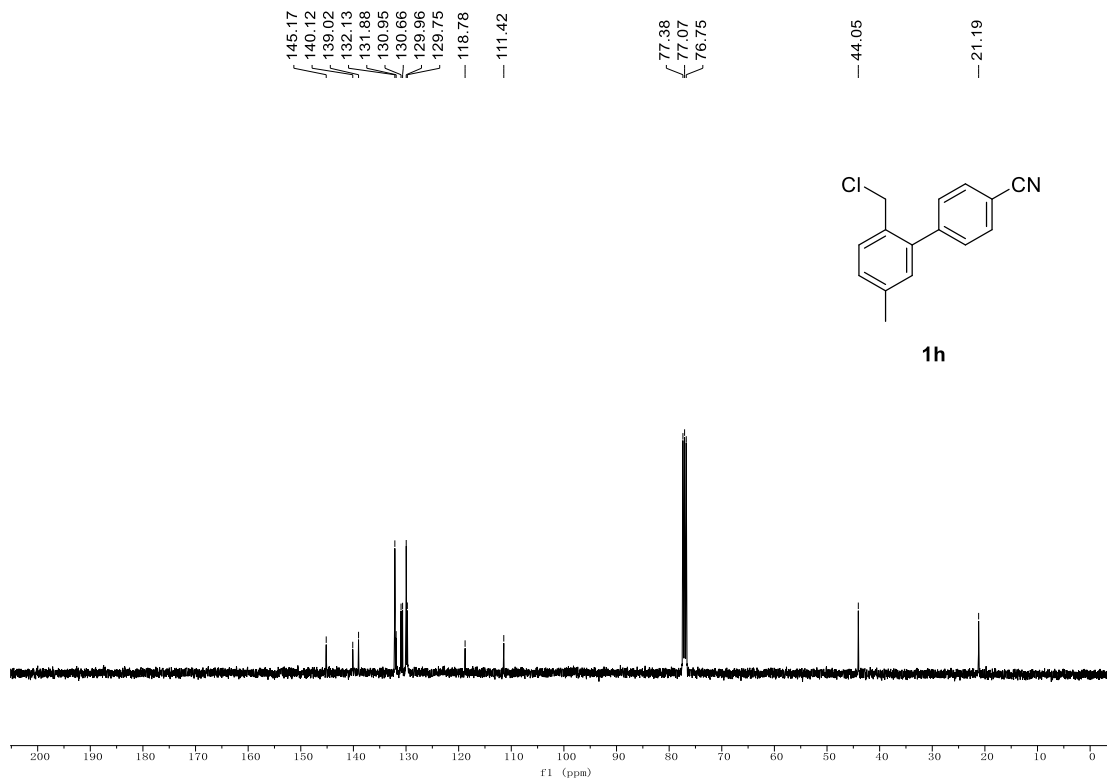

# Methyl 2'-(chloromethyl)-5'-methyl-[1,1'-biphenyl]-4-carboxylate (**1i**)

$^1\text{H}$  NMR, 400 MHz,  $\text{CDCl}_3$

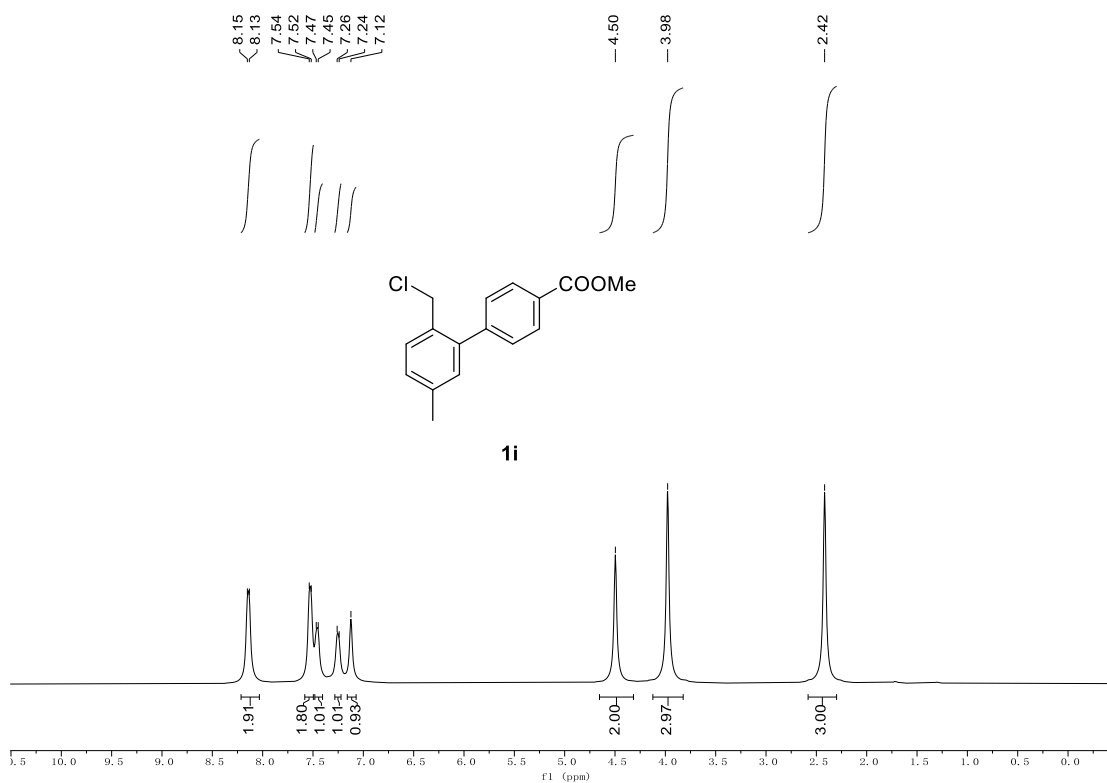

$^{13}\text{C}\{^1\text{H}\}$  NMR, 100 MHz,  $\text{CDCl}_3$

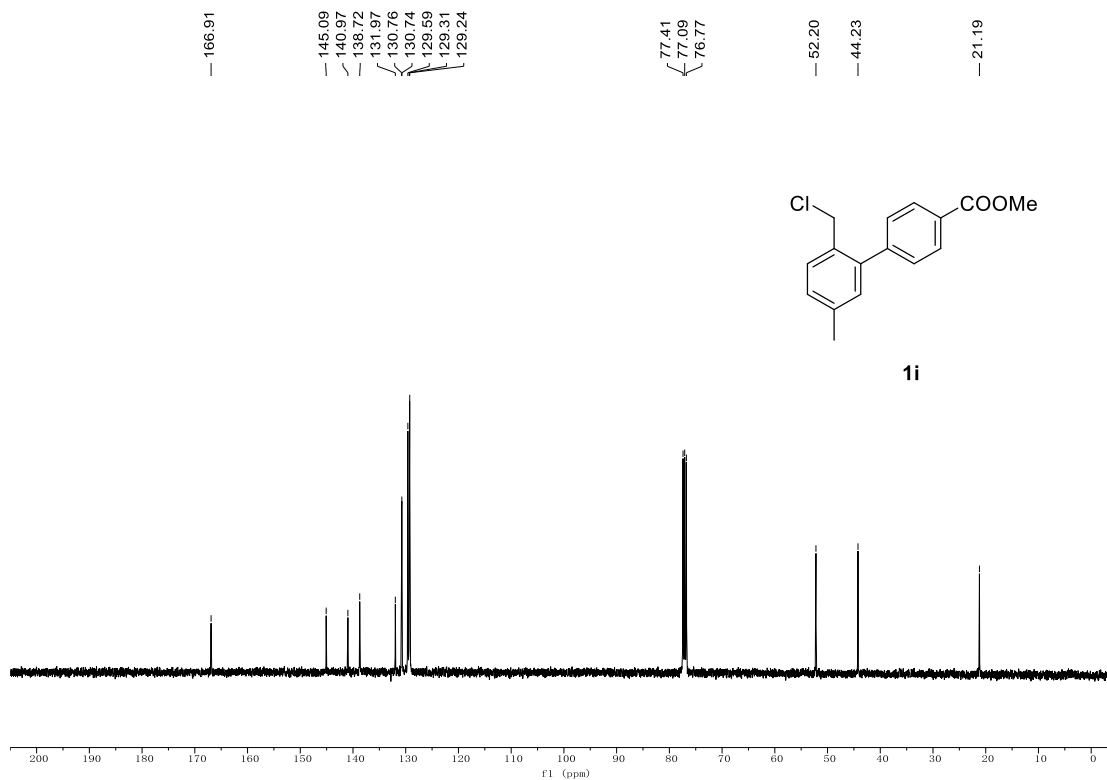

## 2-(Chloromethyl)-5-methyl-4'-nitro-1,1'-biphenyl (1j)

$^1\text{H}$  NMR, 400 MHz,  $\text{CDCl}_3$

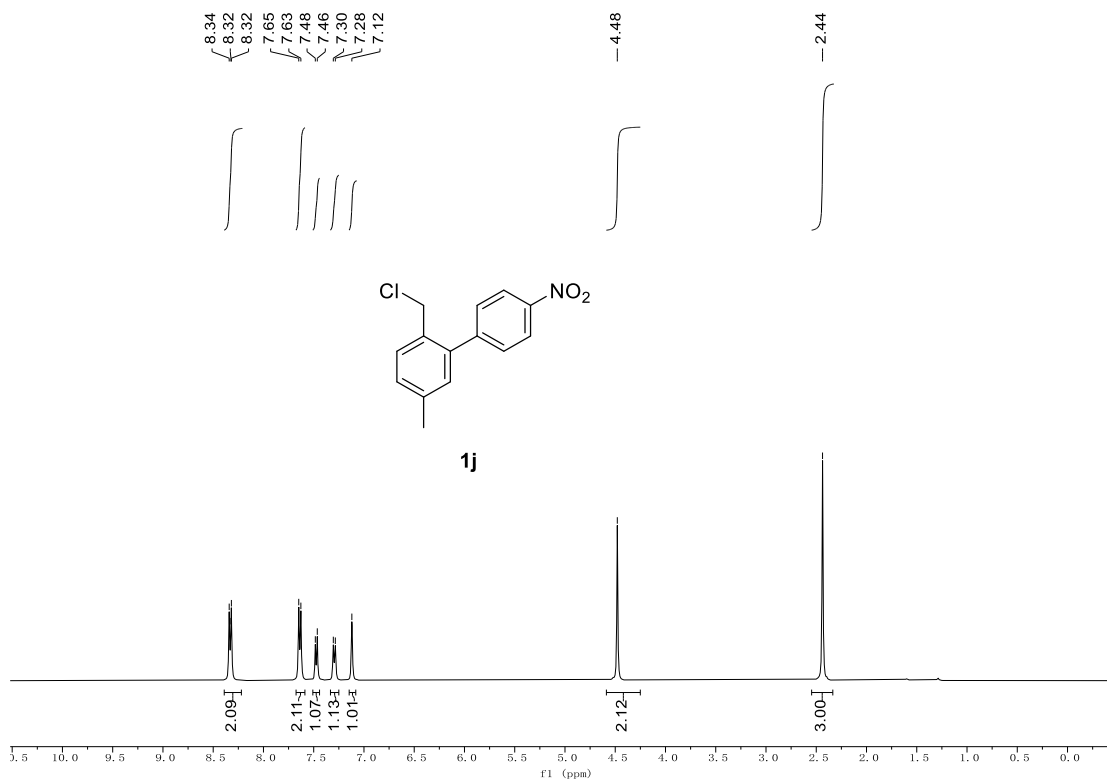

$^{13}\text{C}\{^1\text{H}\}$  NMR, 100 MHz,  $\text{CDCl}_3$

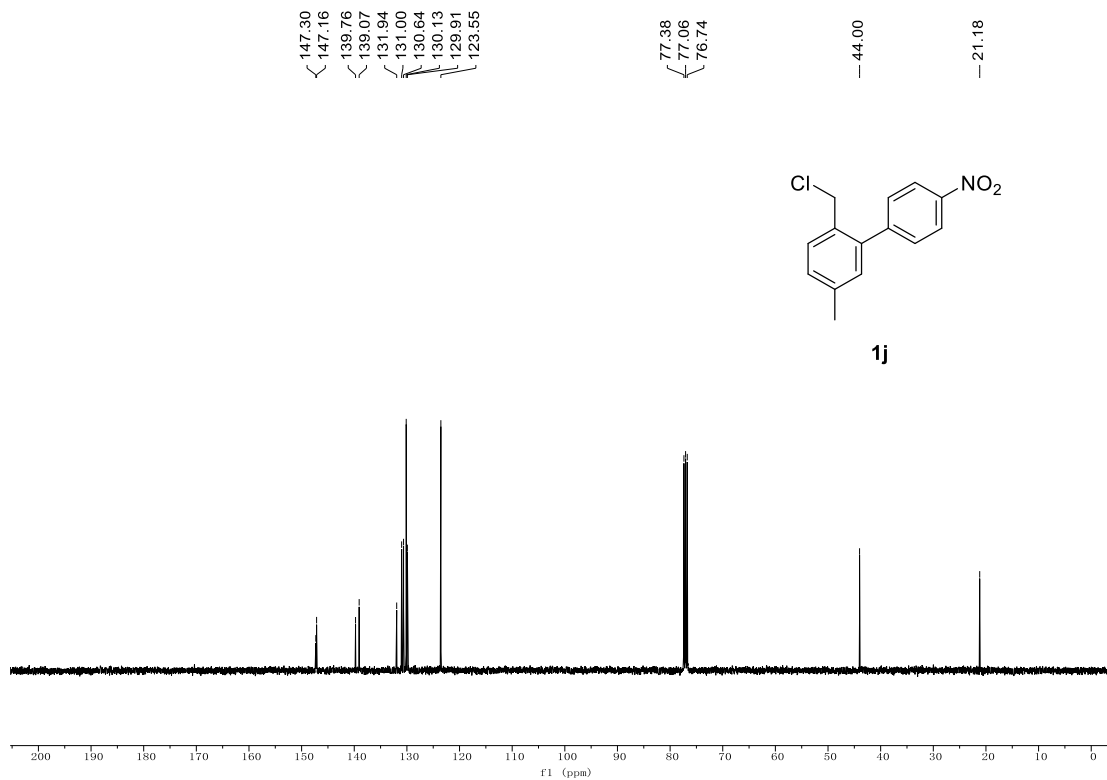

## 2-(Chloromethyl)-5-methyl-4'-(trifluoromethyl)-1,1'-biphenyl (1k)

$^1\text{H}$  NMR, 400 MHz,  $\text{CDCl}_3$

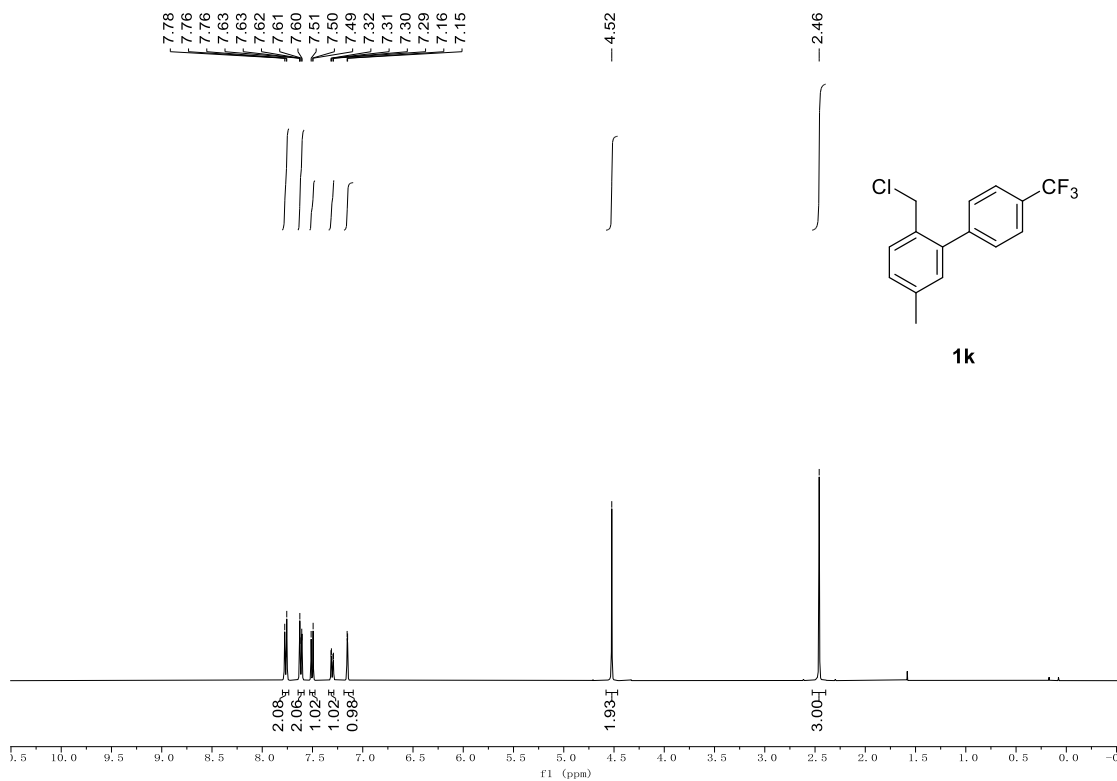

$^{13}\text{C}\{^1\text{H}\}$  NMR, 100 MHz,  $\text{CDCl}_3$

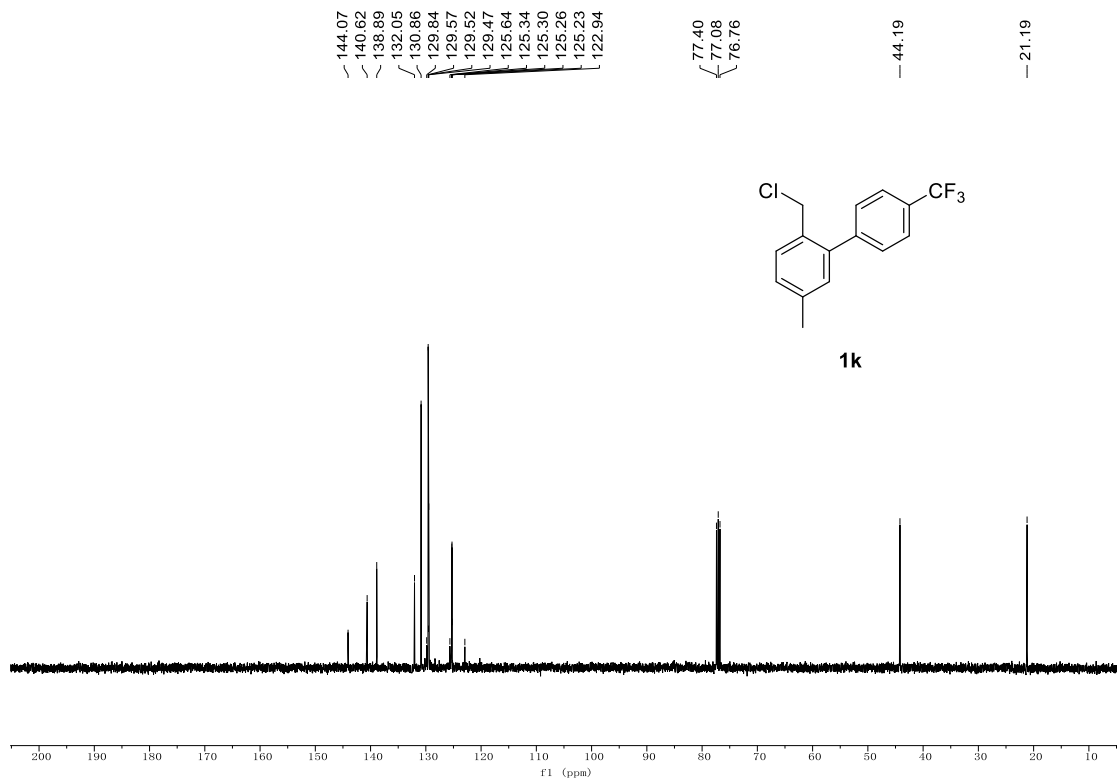

# 2-(Chloromethyl)-2',5,6'-trimethyl-1,1'-biphenyl (11)

$^1\text{H}$  NMR, 400 MHz,  $\text{CDCl}_3$

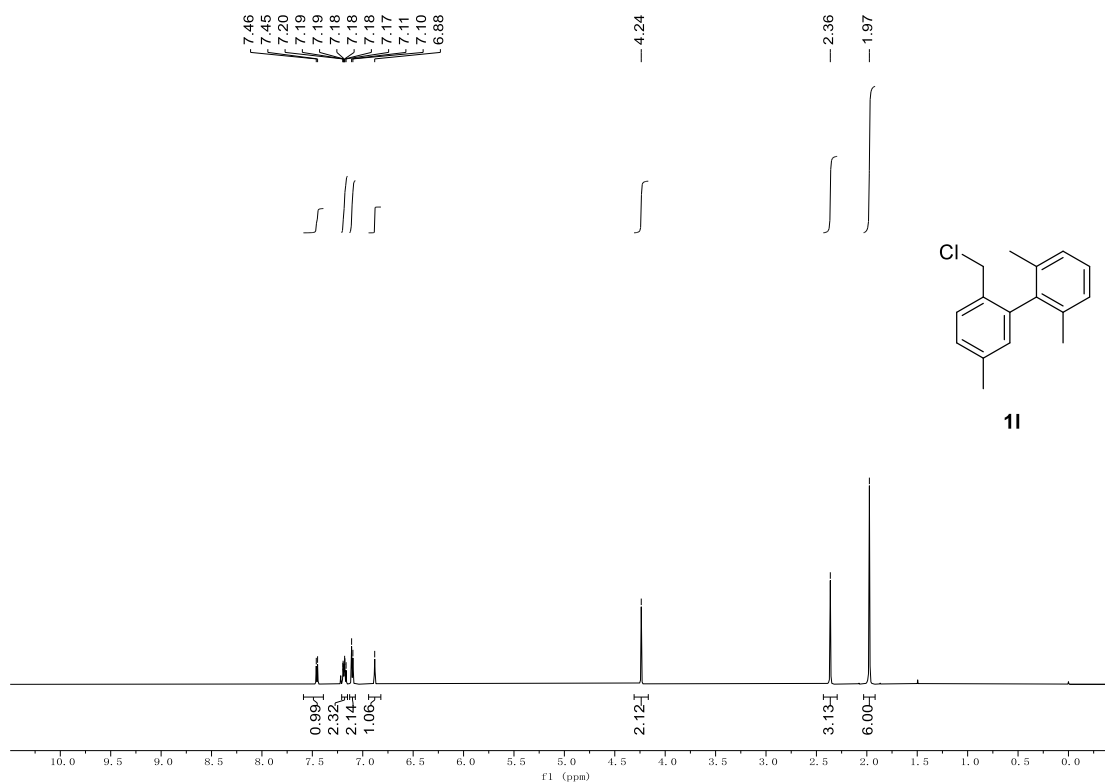

$^{13}\text{C}\{^1\text{H}\}$  NMR, 100 MHz,  $\text{CDCl}_3$

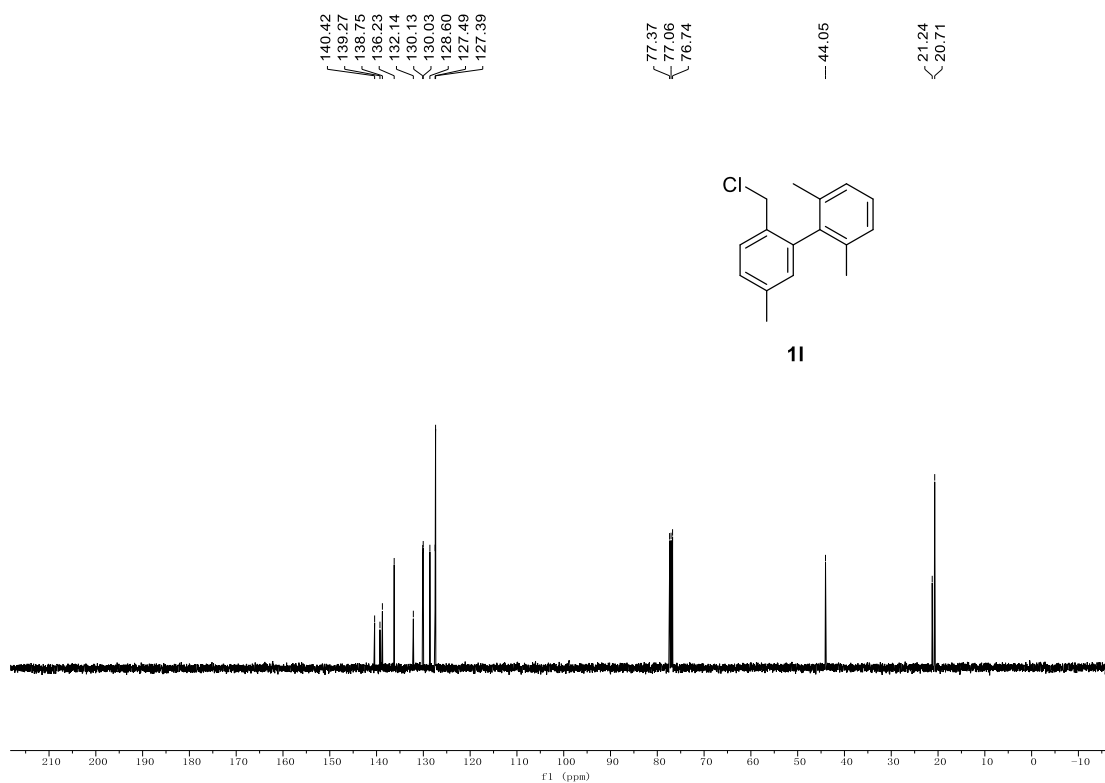



# 1-(Chloromethyl)-2,4-dimethylbenzene (1m)

$^1\text{H}$  NMR, 400 MHz,  $\text{CDCl}_3$

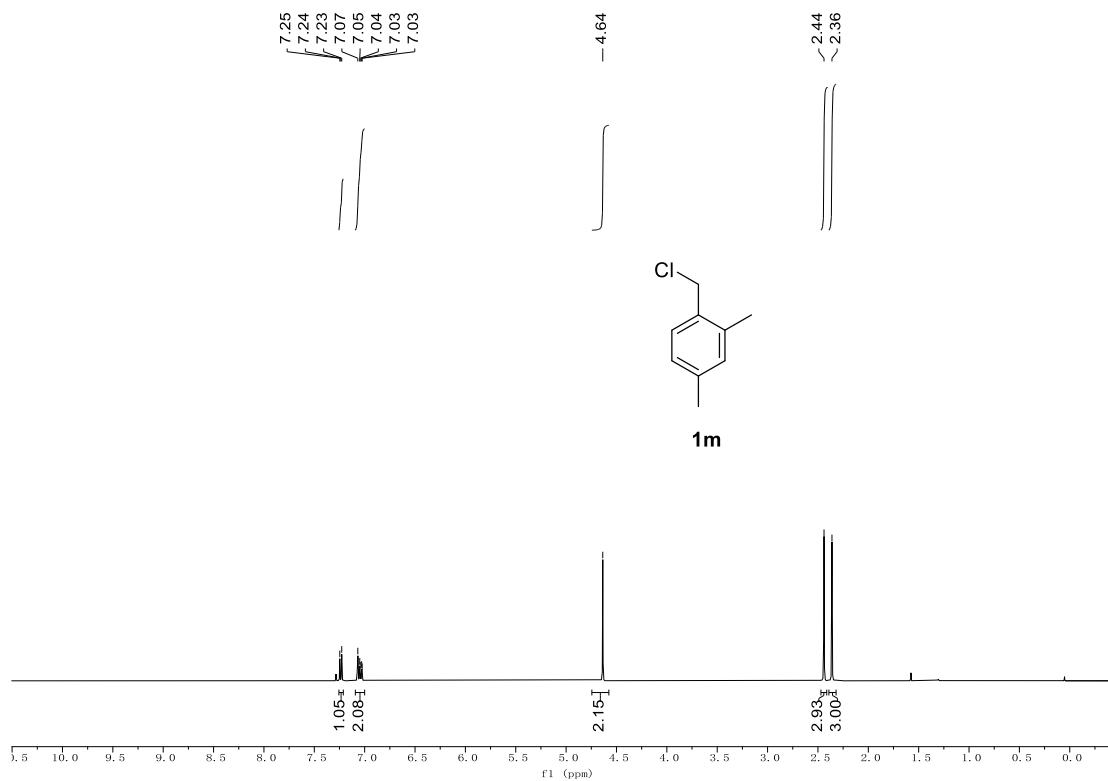

$^{13}\text{C}\{^1\text{H}\}$  NMR, 100 MHz,  $\text{CDCl}_3$

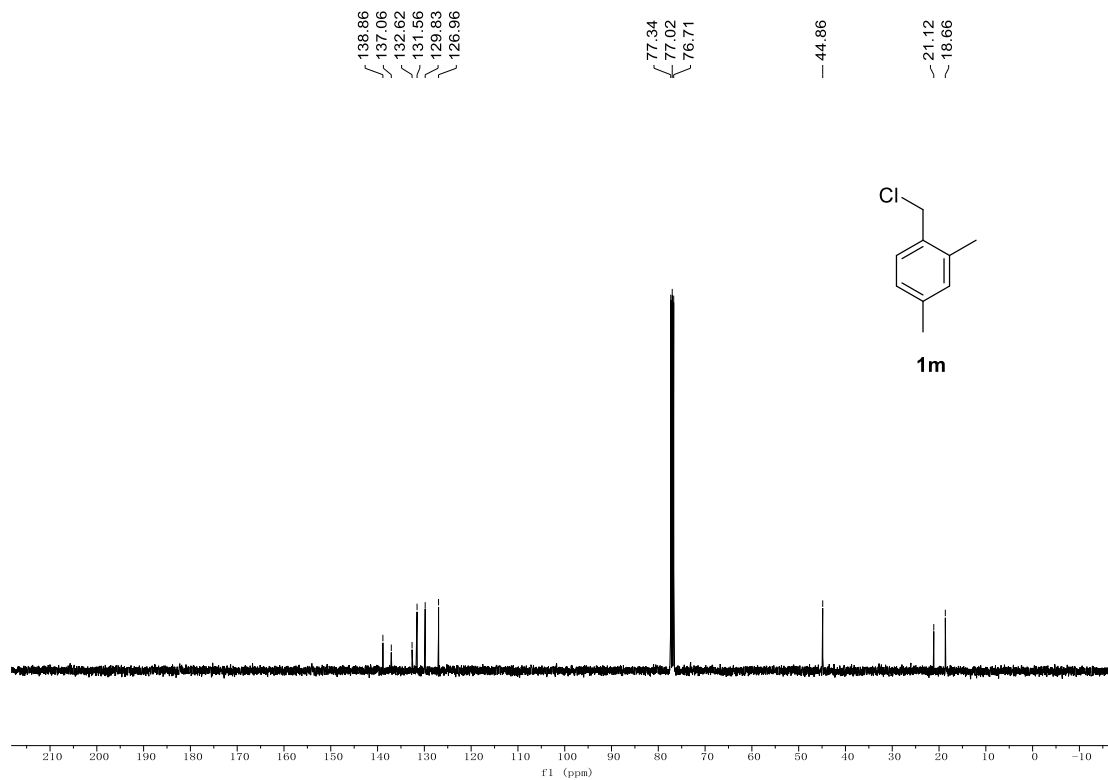

## 2-(2-(Chloromethyl)-5-methylphenyl)thiophene (1n)

$^1\text{H}$  NMR, 400 MHz,  $\text{CDCl}_3$

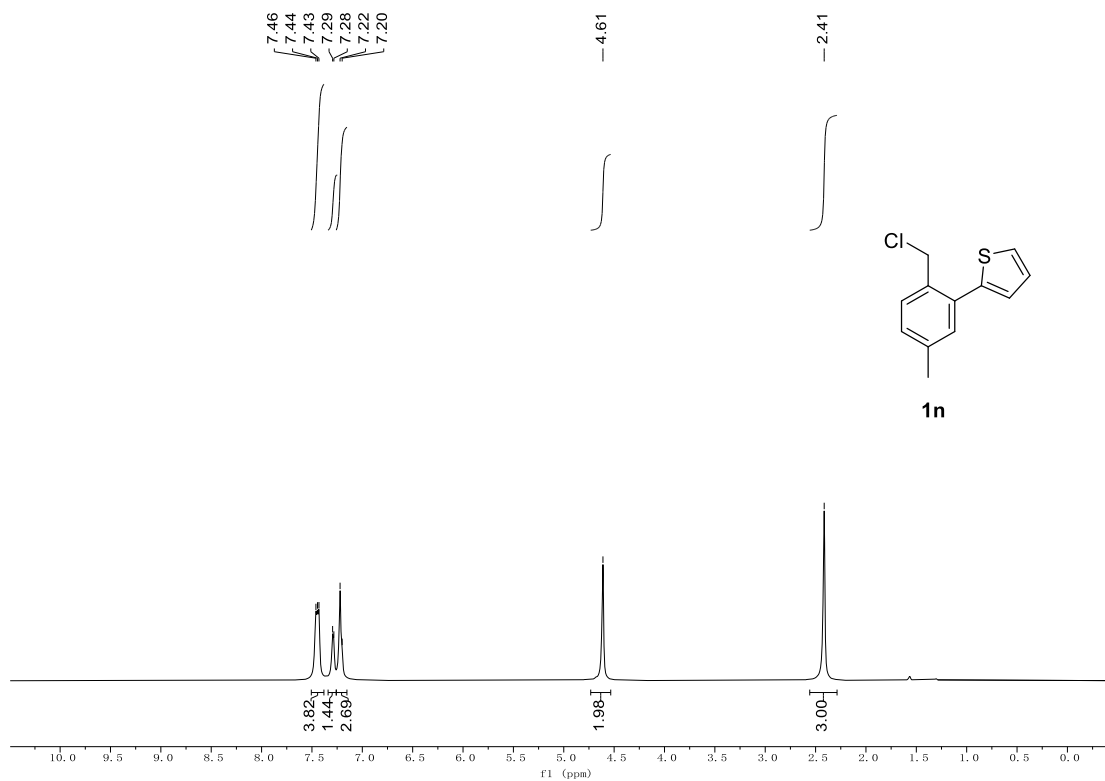

$^{13}\text{C}\{^1\text{H}\}$  NMR, 100 MHz,  $\text{CDCl}_3$

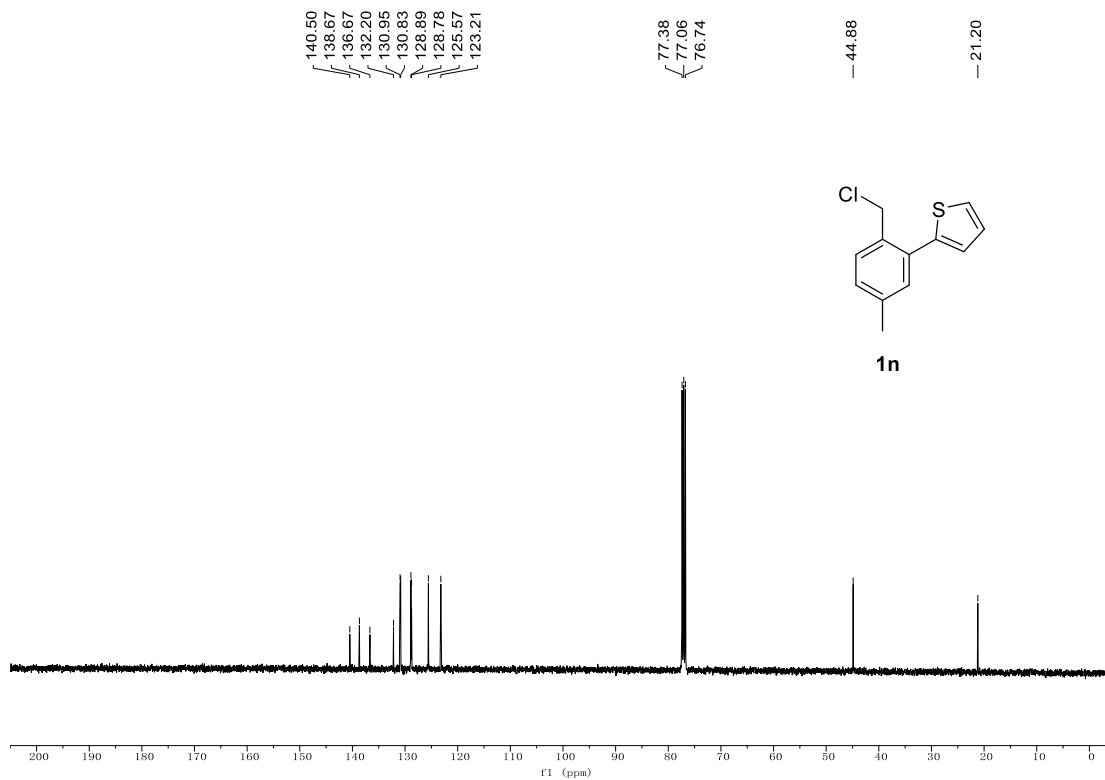

## 2-(2-(Chloromethyl)-5-methylphenyl)naphthalene (1o)

$^1\text{H}$  NMR, 400 MHz,  $\text{CDCl}_3$

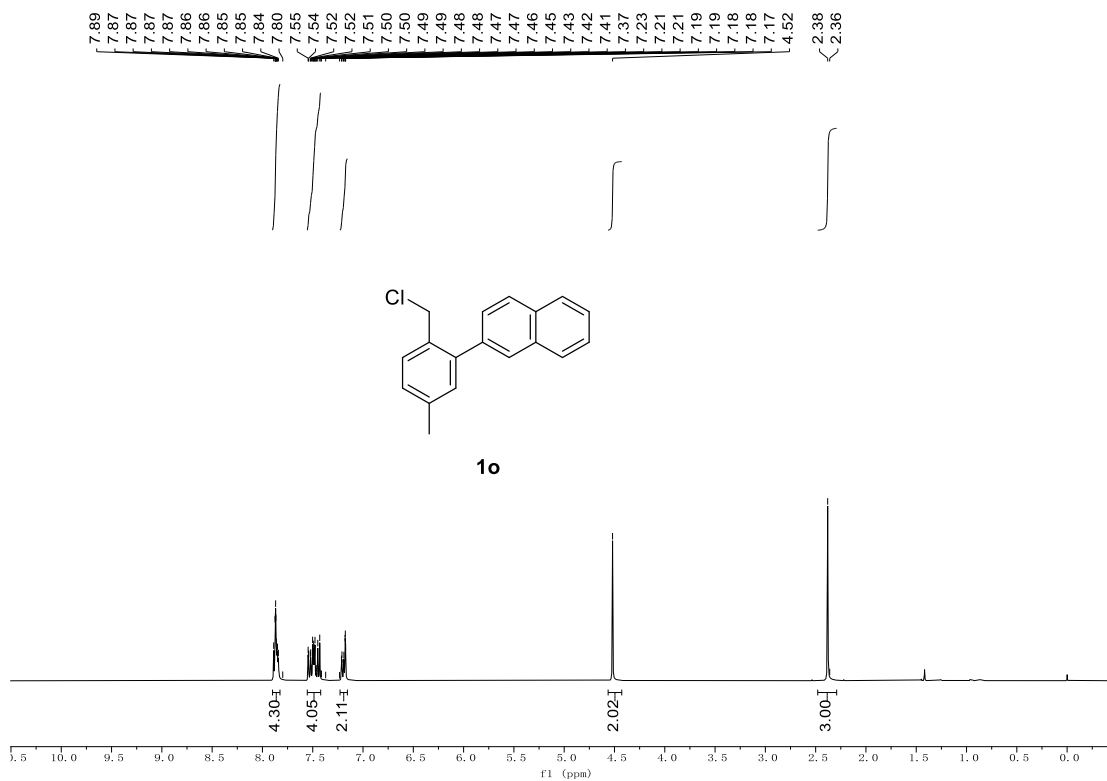

$^{13}\text{C}\{^1\text{H}\}$  NMR, 100 MHz,  $\text{CDCl}_3$

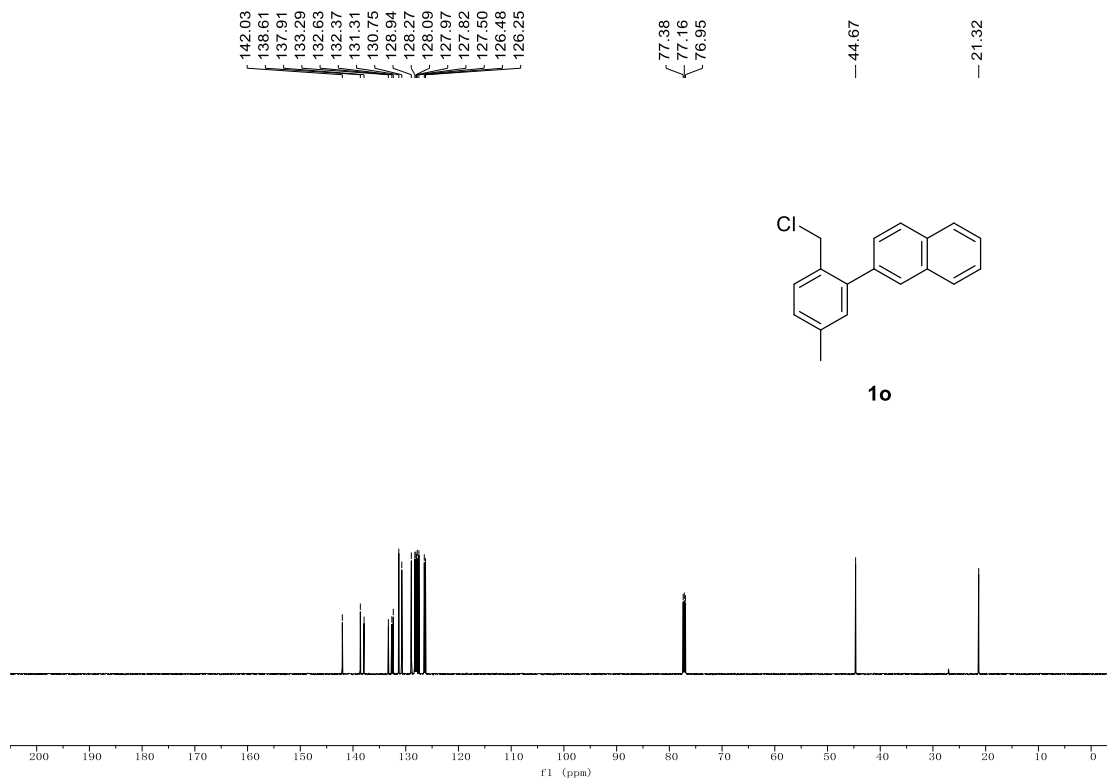

**(E)-1-Ethyl-4-methyl-2-(prop-1-en-1-yl)benzene (2aa) and (E)-4-ethyl-1-methyl-2-(prop-1-en-1-yl)benzene (2aa')**

<sup>1</sup>H NMR, 400 MHz, CDCl<sub>3</sub>

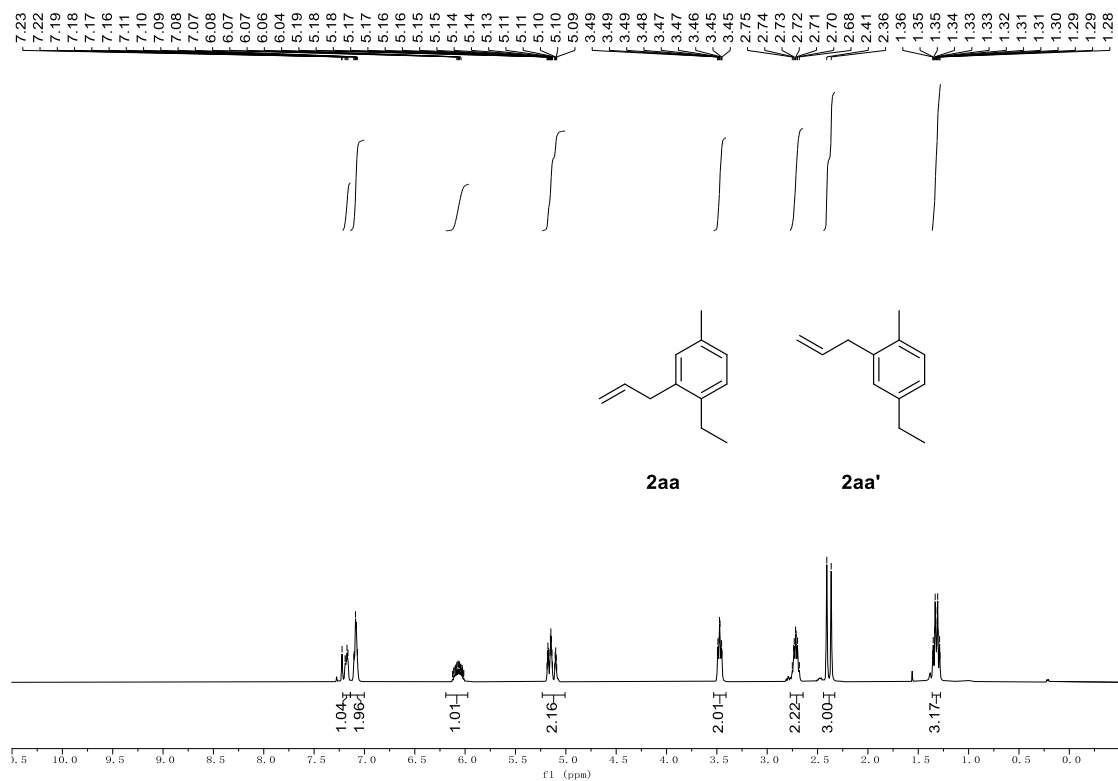

**(E)-2,5-Dimethyl-4-(prop-1-en-1-yl)-1,1'-biphenyl (2a)**

<sup>1</sup>H NMR, 400 MHz, CDCl<sub>3</sub>

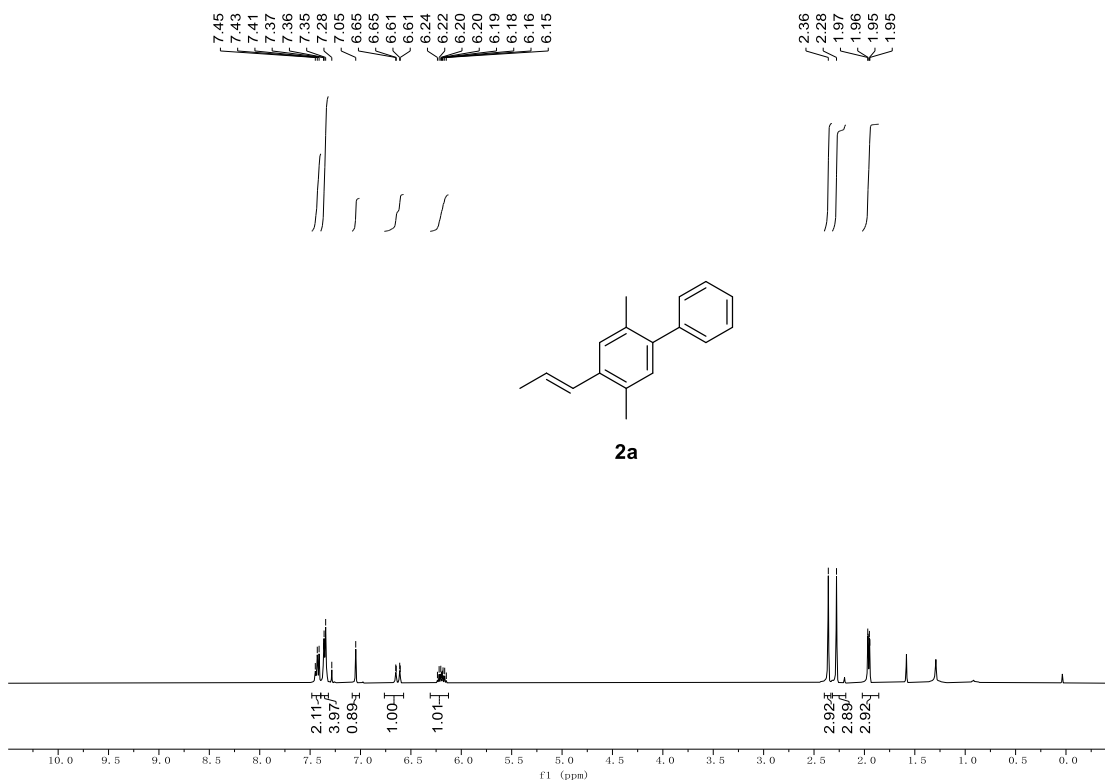

$^{13}\text{C}\{^1\text{H}\}$  NMR, 100 MHz,  $\text{CDCl}_3$

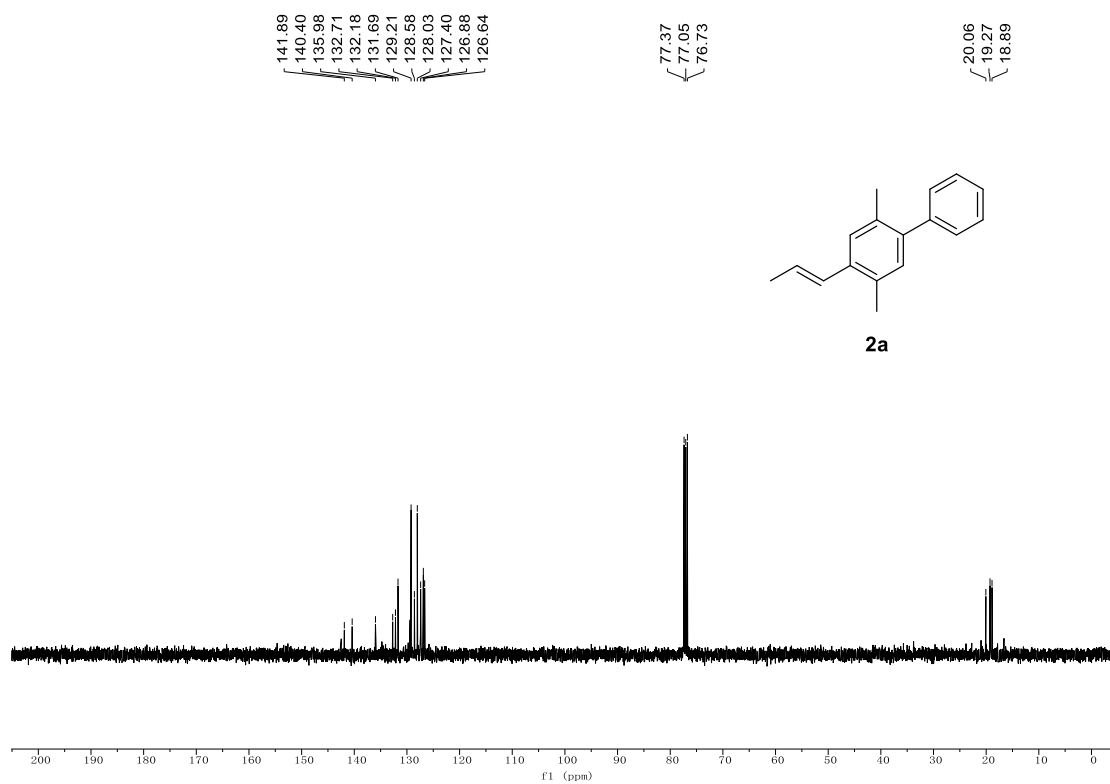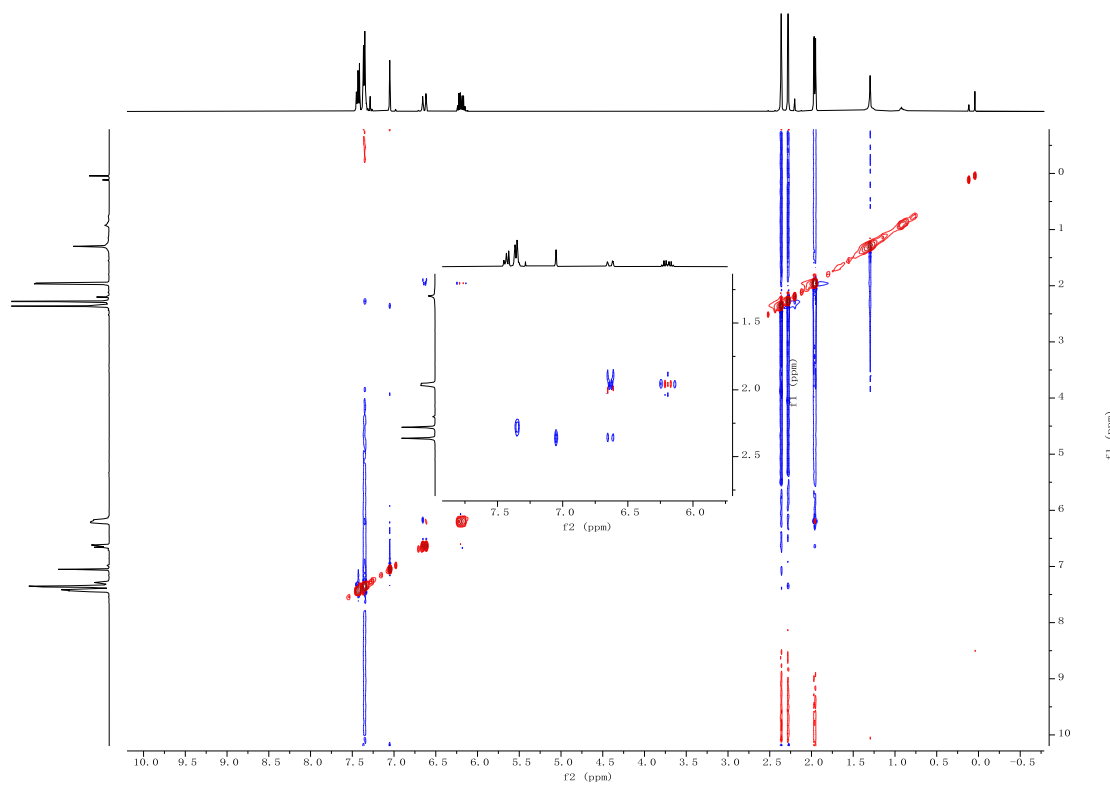

**(E)-2,5-Dimethyl-4-(prop-1-en-1-yl)-1,1'-biphenyl-*d* (2a-*d*)**

$^1\text{H}$  NMR, 400 MHz,  $\text{CDCl}_3$

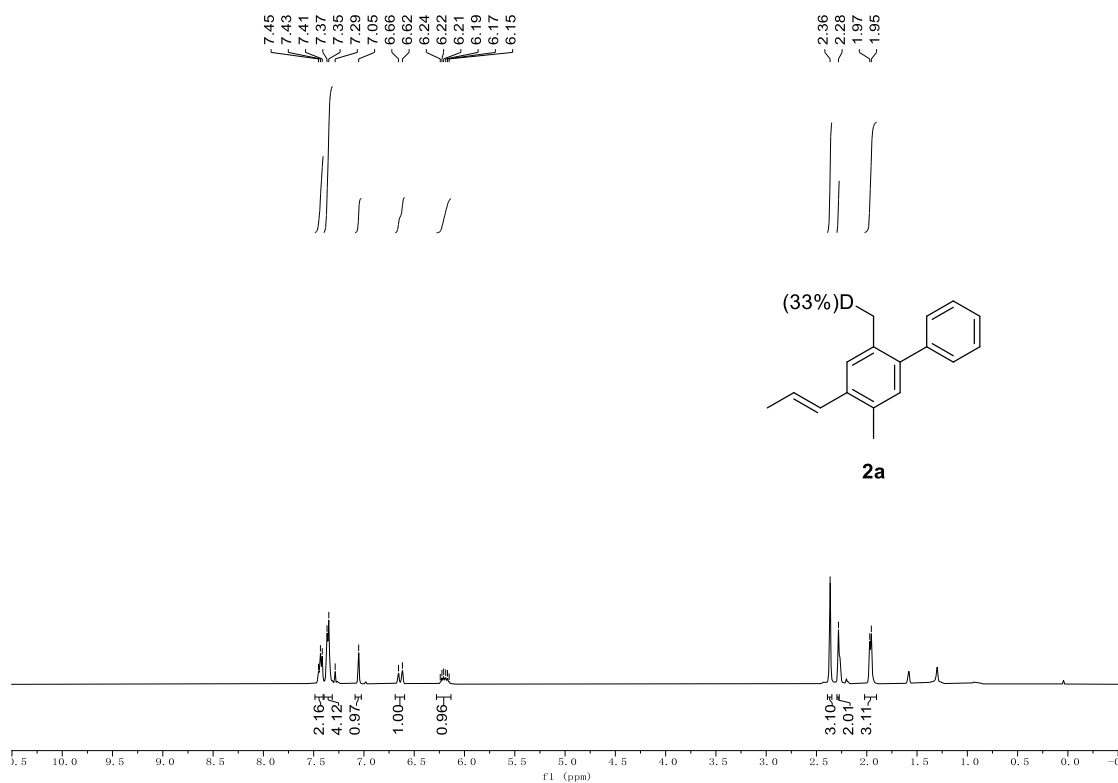

$^{13}\text{C}\{^1\text{H}\}$  NMR, 100 MHz,  $\text{CDCl}_3$

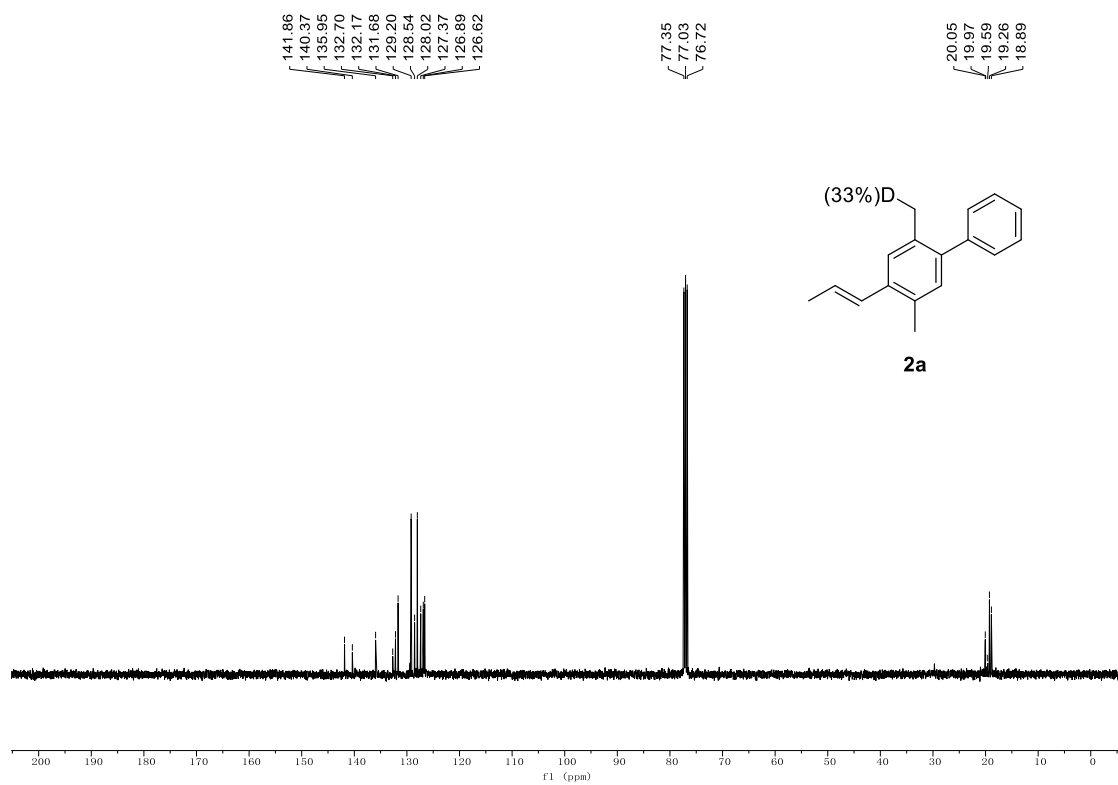

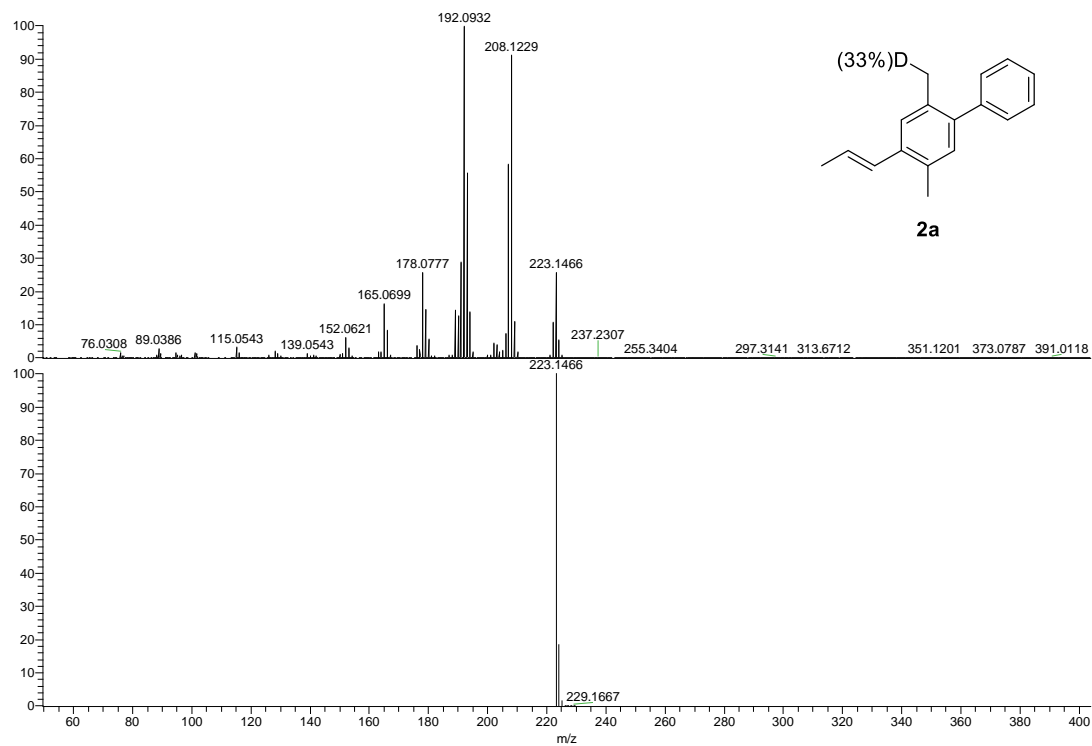

HRMS (EI)  $m/z$ :  $[M]^+$  Calcd for  $C_{17}H_{17}D$  223.1471; Found 223.1466.

**(E)-4'-Fluoro-2,5-dimethyl-4-(prop-1-en-1-yl)-1,1'-biphenyl (2b)**

$^1H$  NMR, 400 MHz,  $CDCl_3$

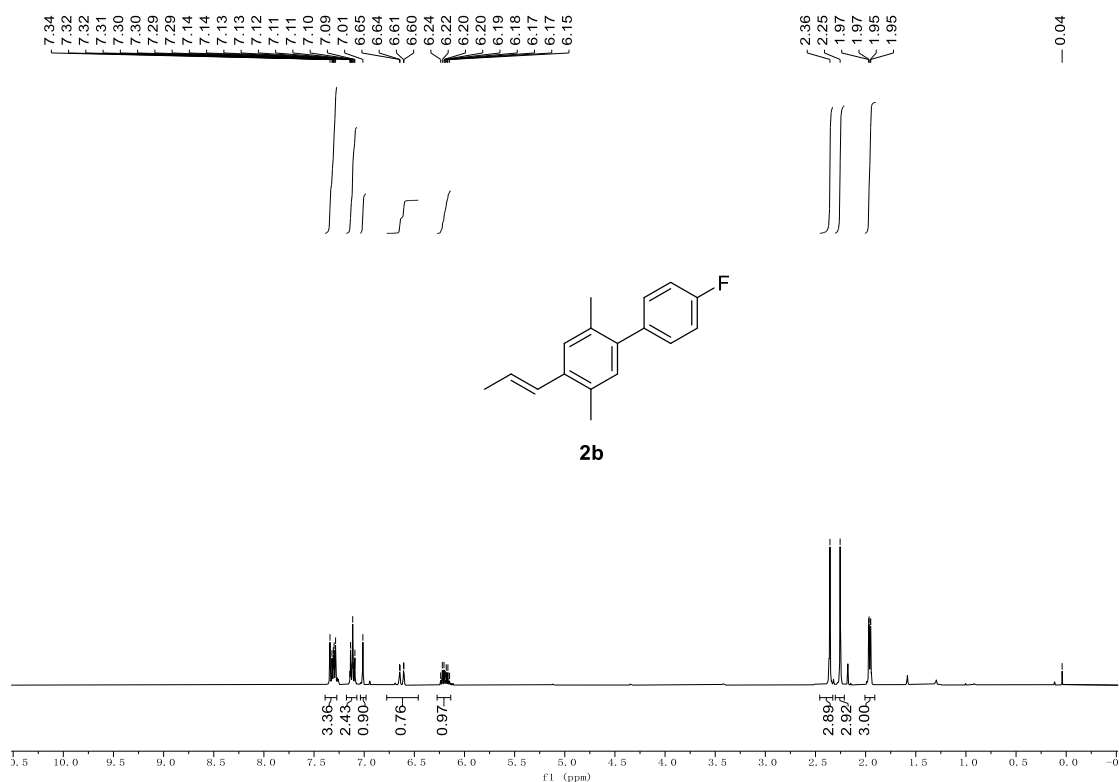

$^{13}\text{C}\{^1\text{H}\}$  NMR, 100 MHz,  $\text{CDCl}_3$

162.49  
158.11  
139.31  
137.74  
136.12  
132.72  
132.25  
131.66  
130.73  
130.66  
128.45  
127.41  
127.05  
115.00  
114.79

77.36  
77.05  
76.73

20.03  
19.26  
18.91

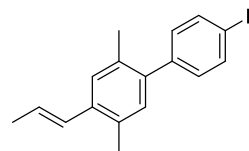

**2b**

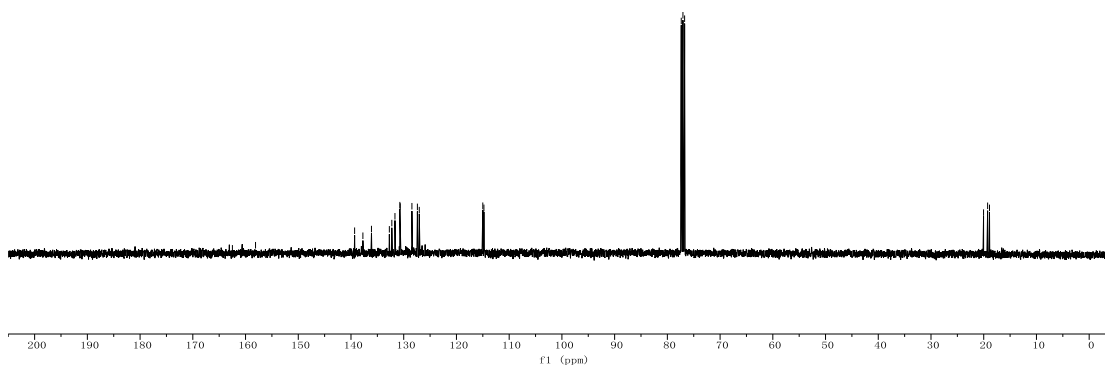

**(E)-4'-Chloro-2,5-dimethyl-4-(prop-1-en-1-yl)-1,1'-biphenyl (2c)**

$^1\text{H}$  NMR, 400 MHz,  $\text{CDCl}_3$

7.37  
7.36  
7.35  
7.34  
7.29  
7.25  
7.24  
7.23  
7.22  
7.22  
7.21  
7.21  
7.20  
6.96  
6.60  
6.60  
6.56  
6.56  
6.19  
6.18  
6.16  
6.15  
6.14  
6.14  
6.12  
6.12  
6.10

2.31  
2.21  
1.93  
1.92  
1.91  
1.91

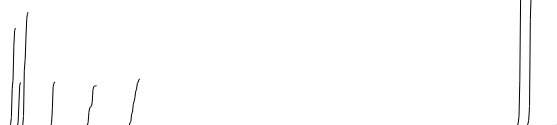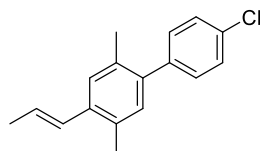

**2c**

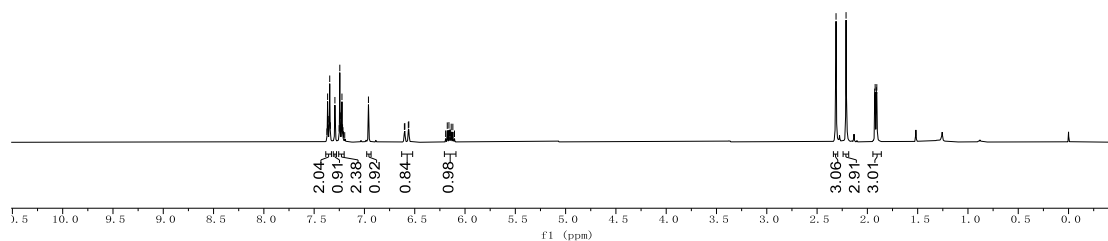



$^{13}\text{C}\{^1\text{H}\}$  NMR, 100 MHz,  $\text{CDCl}_3$

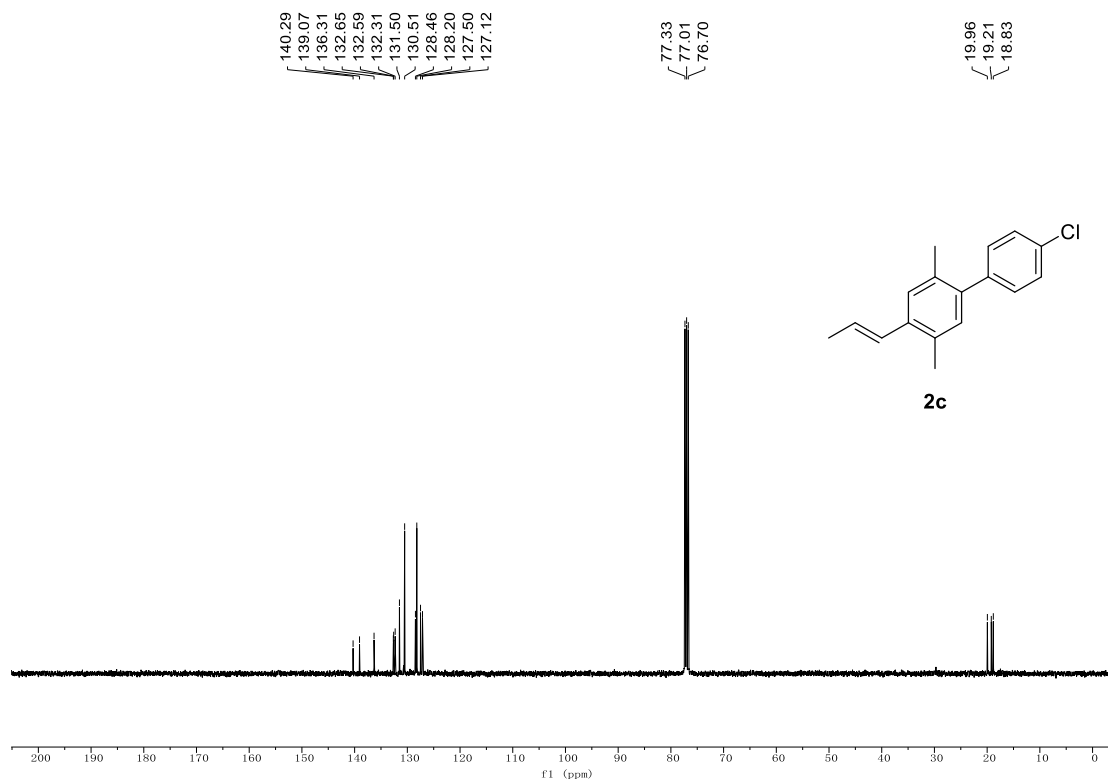

(E)-4'-Bromo-2,5-dimethyl-4-(prop-1-en-1-yl)-1,1'-biphenyl (**2d**)

$^1\text{H}$  NMR, 400 MHz,  $\text{CDCl}_3$

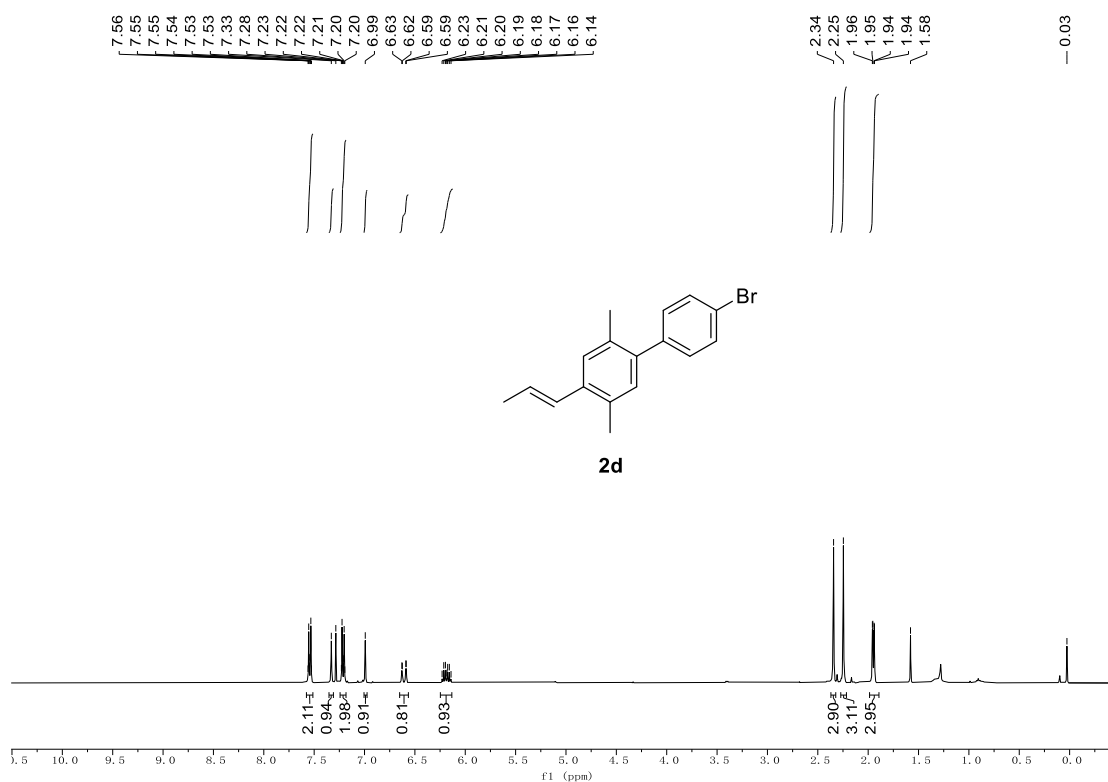

$^{13}\text{C}\{^1\text{H}\}$  NMR, 100 MHz,  $\text{CDCl}_3$

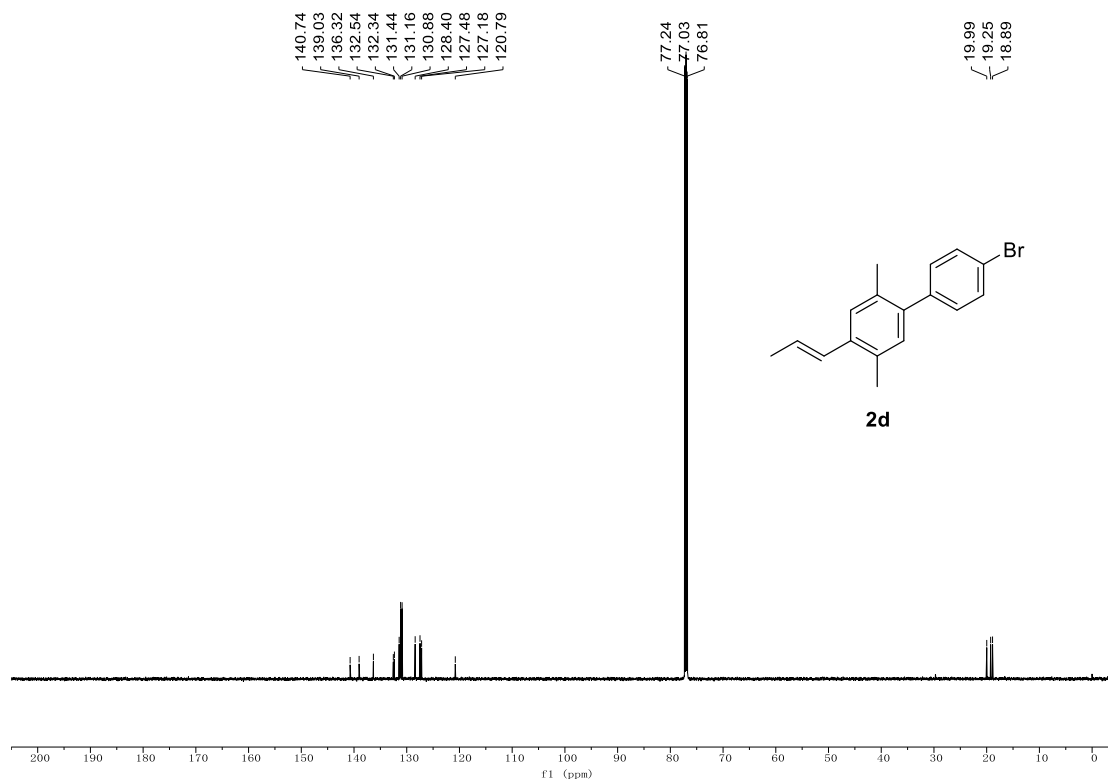

(E)-2,4',5-Trimethyl-4-(prop-1-en-1-yl)-1,1'-biphenyl (**2e**)

$^1\text{H}$  NMR, 400 MHz,  $\text{CDCl}_3$

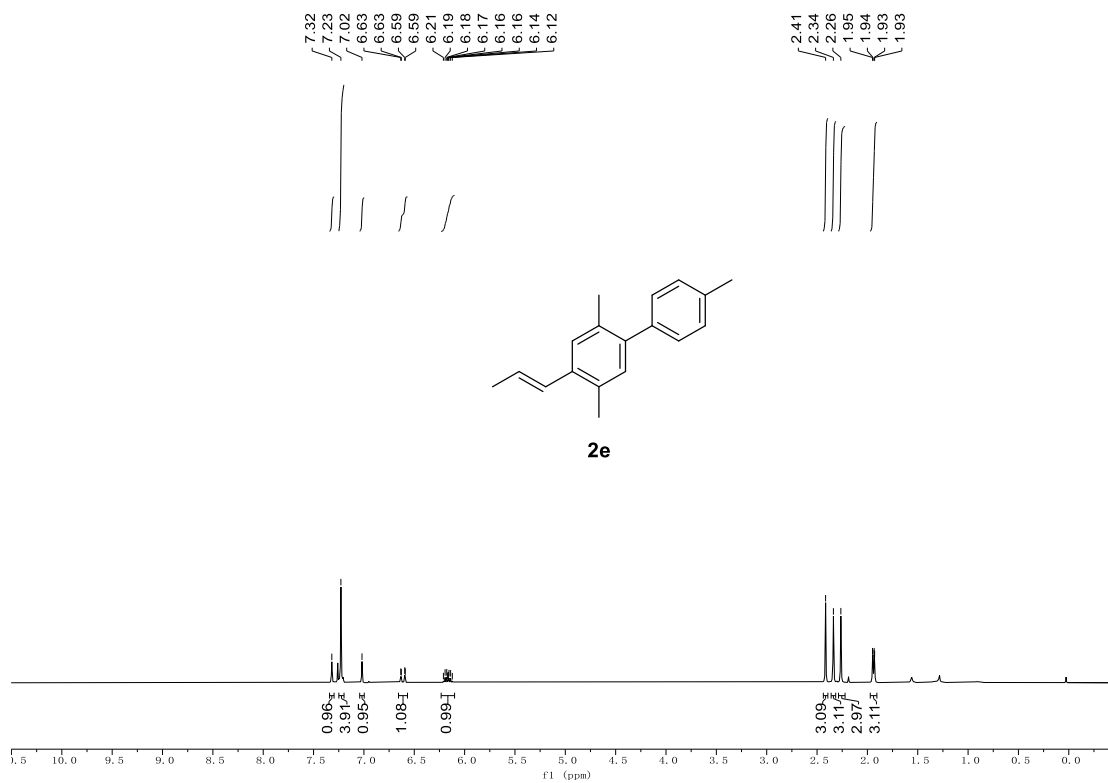

$^{13}\text{C}\{^1\text{H}\}$  NMR, 100 MHz,  $\text{CDCl}_3$

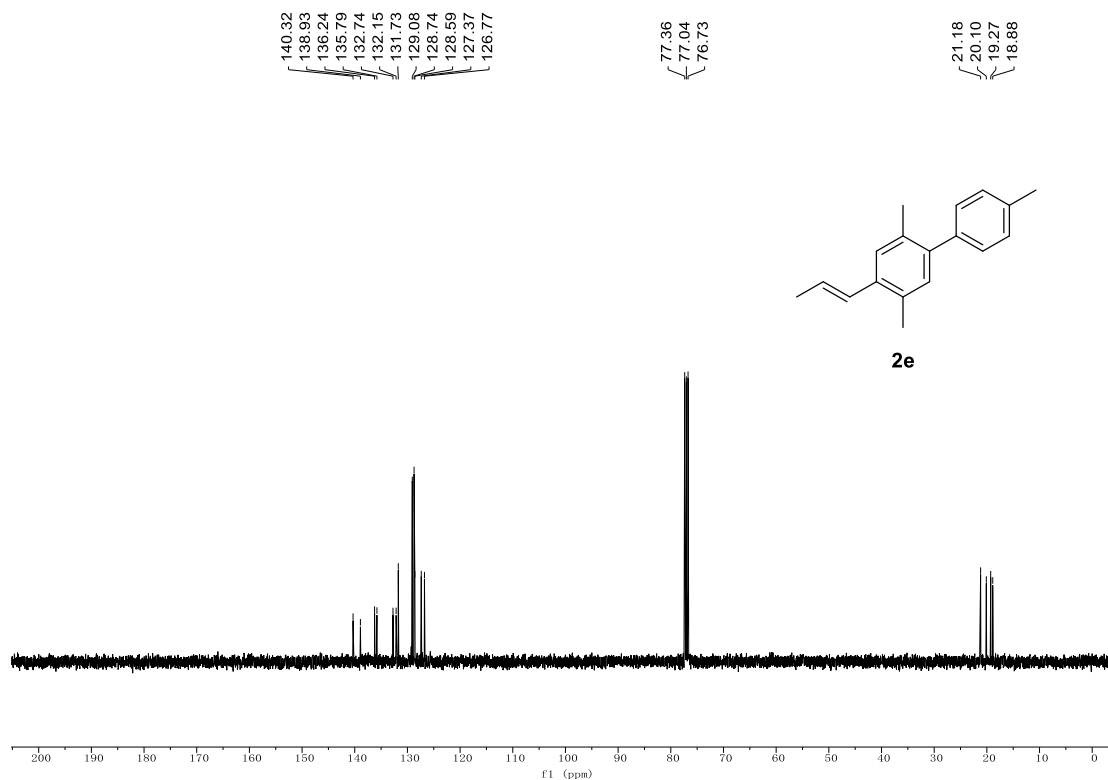

(E)-4'-Methoxy-2,5-dimethyl-4-(prop-1-en-1-yl)-1,1'-biphenyl (**2f**)

$^1\text{H}$  NMR, 400 MHz,  $\text{CDCl}_3$

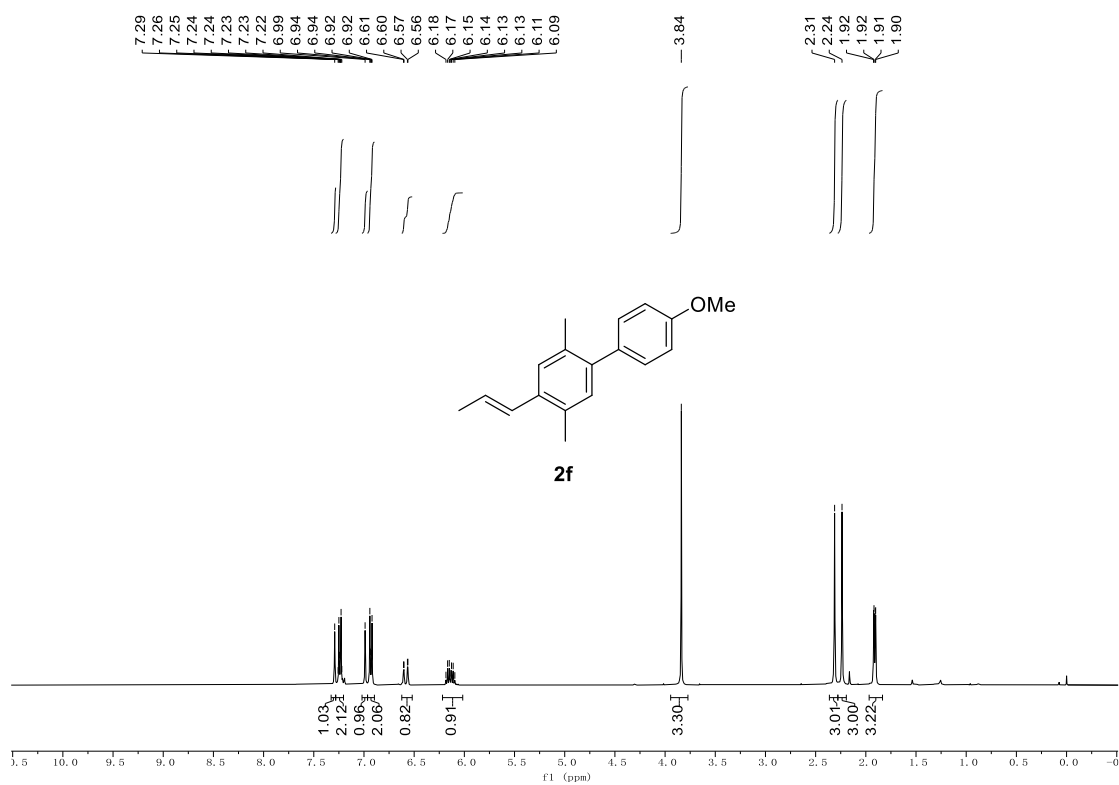

$^{13}\text{C}\{^1\text{H}\}$  NMR, 100 MHz,  $\text{CDCl}_3$

158.45  
140.00  
135.69  
134.28  
132.82  
132.15  
131.76  
130.24  
128.58  
127.37  
126.73  
113.46  
113.41

77.36  
77.05  
76.73

55.30

20.14  
19.27  
18.89

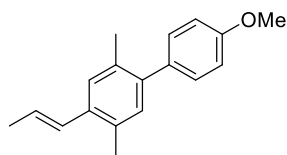

**2f**

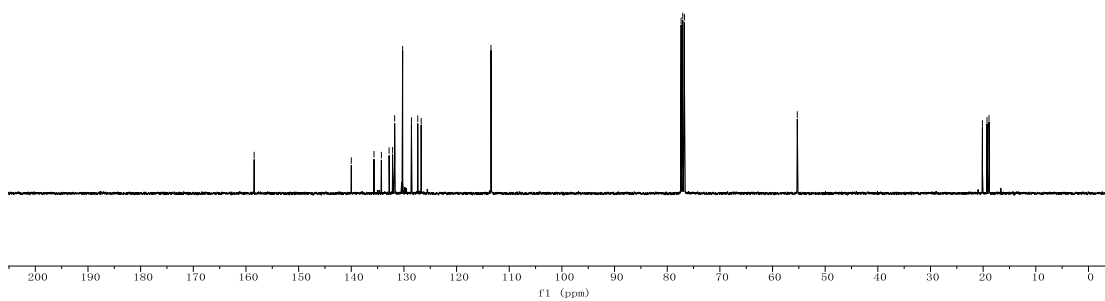

(E)-2,5-Dimethyl-4-(prop-1-en-1-yl)-4'-(trifluoromethoxy)-1,1'-biphenyl (**2g**)

$^1\text{H}$  NMR, 400 MHz,  $\text{CDCl}_3$

7.33  
7.32  
7.31  
7.31  
7.24  
7.24  
7.22  
7.22  
6.98  
6.61  
6.60  
6.57  
6.56  
6.20  
6.19  
6.17  
6.16  
6.15  
6.15  
6.13  
6.13  
6.11

2.32  
2.22  
1.93  
1.93  
1.92  
1.91

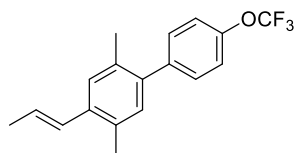

**2g**

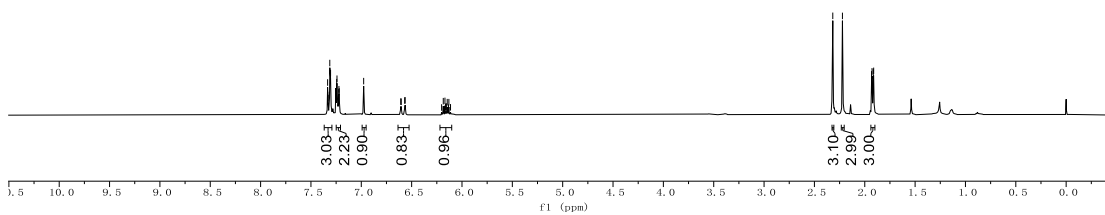

$^{13}\text{C}\{^1\text{H}\}$  NMR, 100 MHz,  $\text{CDCl}_3$

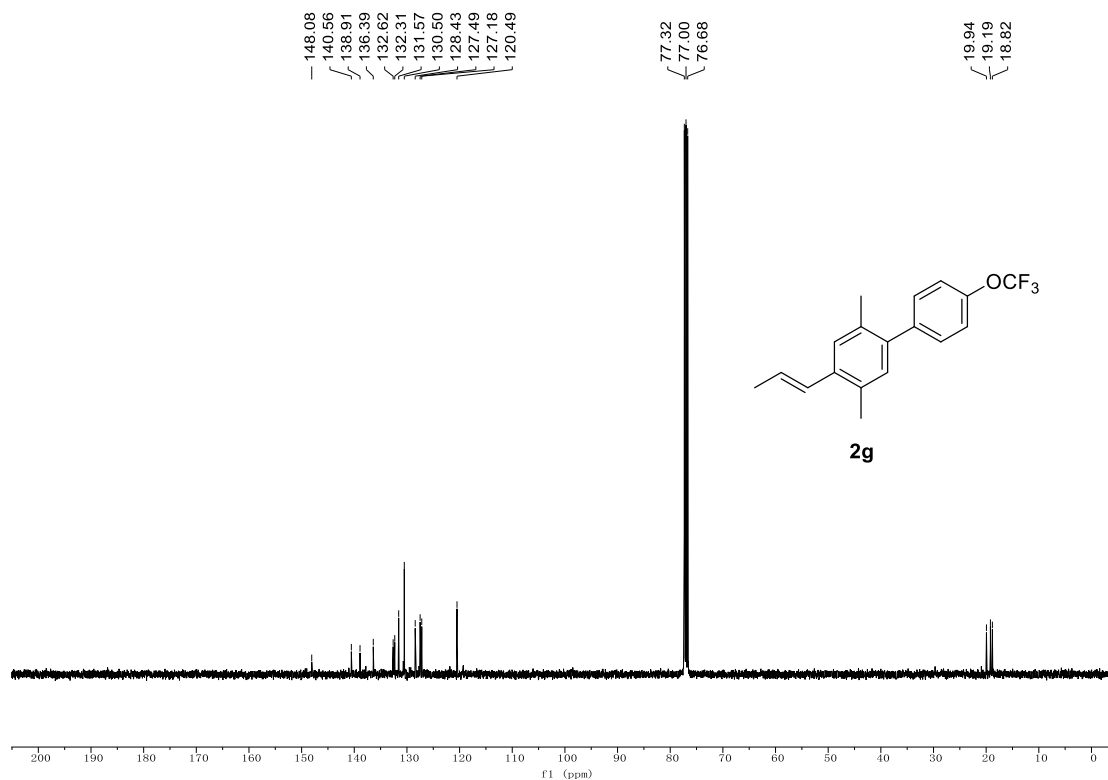

(E)-2',5'-Dimethyl-4'-(prop-1-en-1-yl)-[1,1'-biphenyl]-4-carbonitrile (**2h**)

$^1\text{H}$  NMR, 400 MHz,  $\text{CDCl}_3$

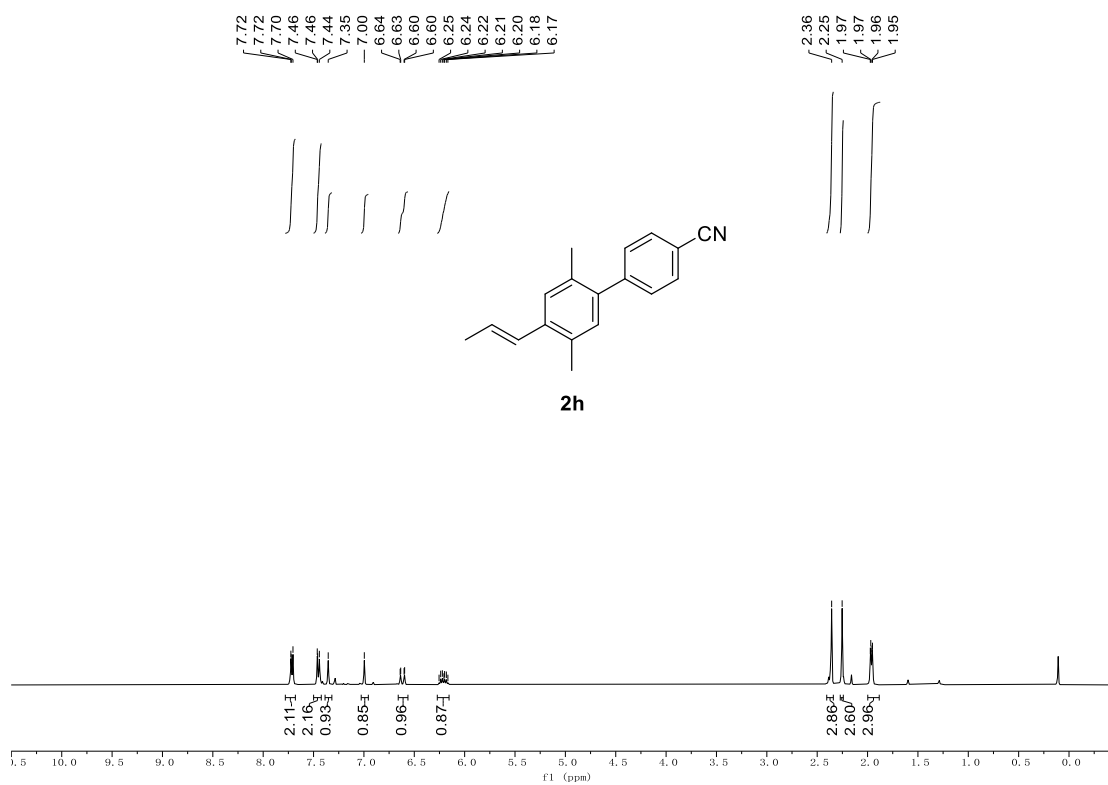

$^{13}\text{C}\{^1\text{H}\}$  NMR, 100 MHz,  $\text{CDCl}_3$

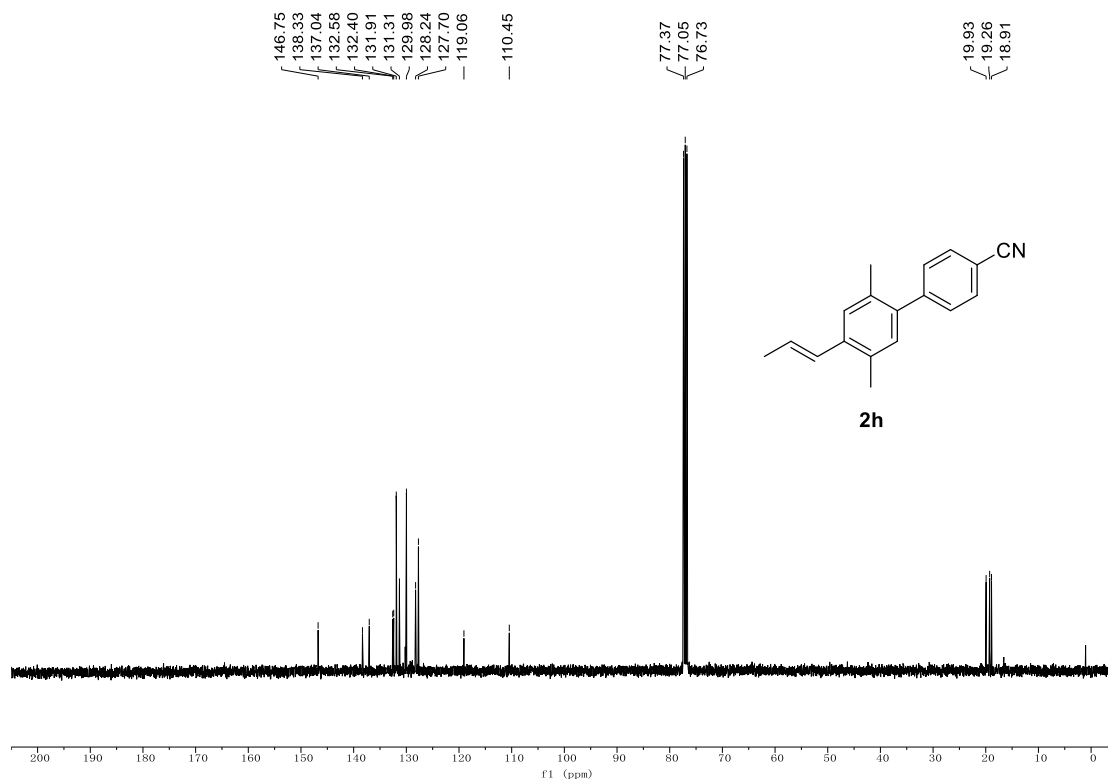

Methyl (E)-2',5'-dimethyl-4'-(prop-1-en-1-yl)-[1,1'-biphenyl]-4-carboxylate (**2i**)

$^1\text{H}$  NMR, 400 MHz,  $\text{CDCl}_3$

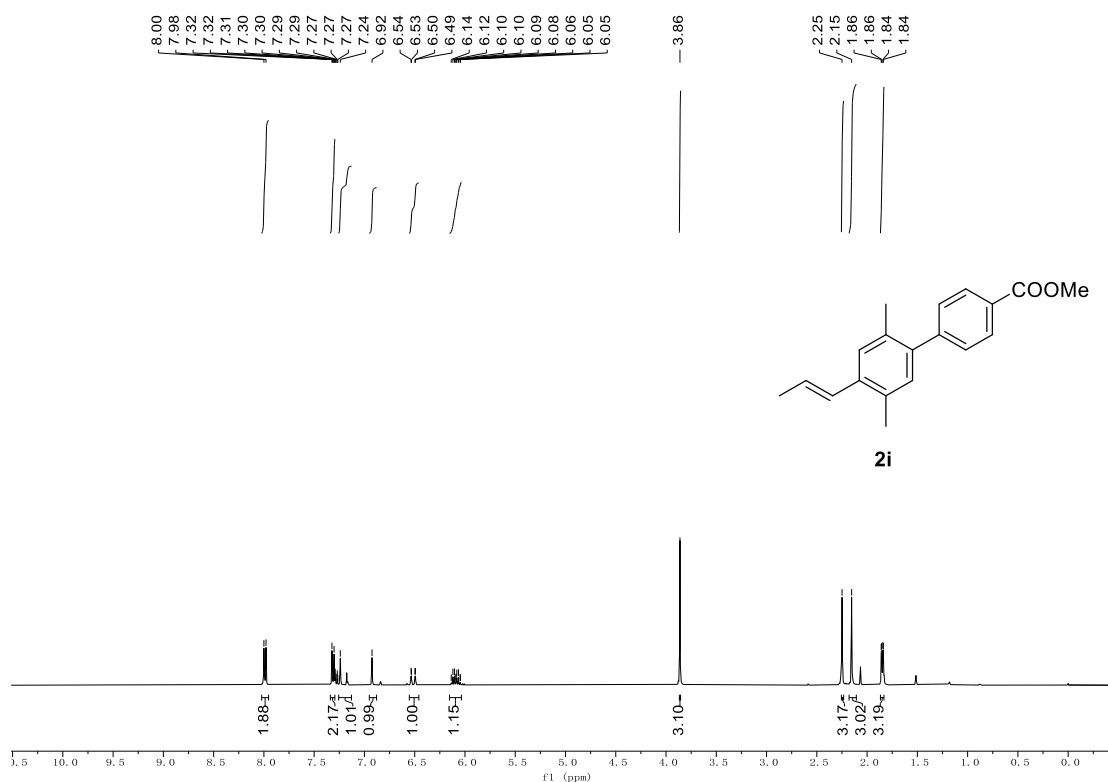

$^{13}\text{C}\{^1\text{H}\}$  NMR, 100 MHz,  $\text{CDCl}_3$

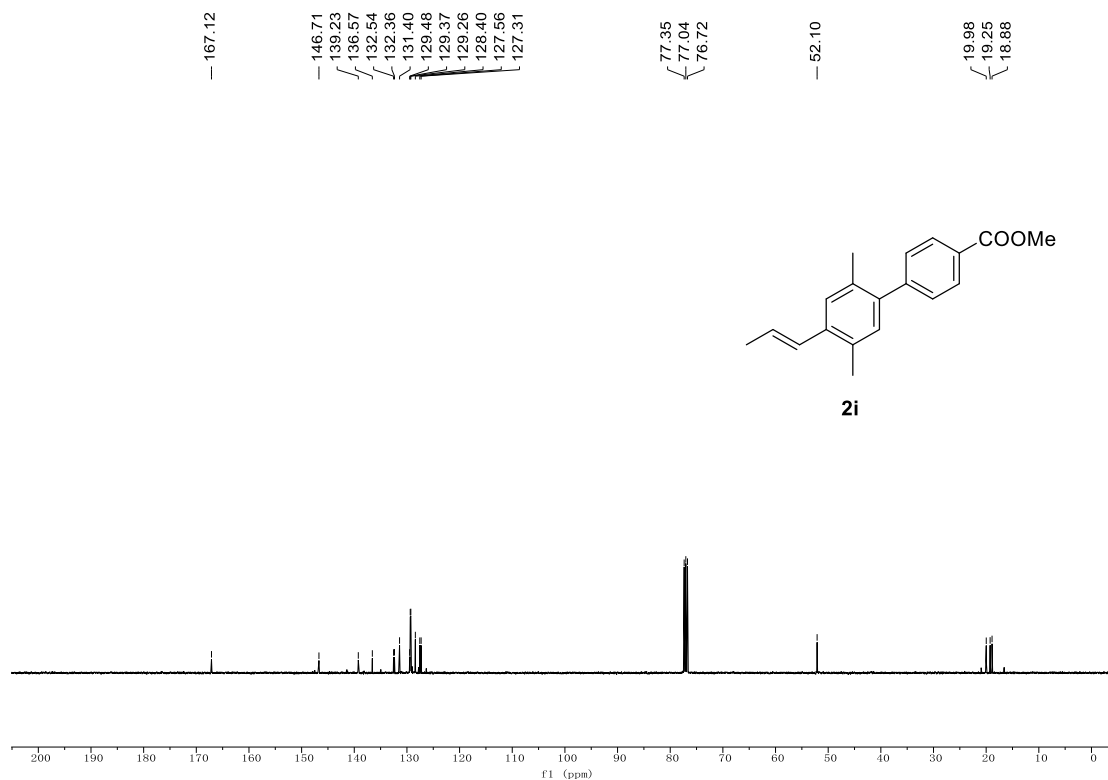

(E)-2,5-Dimethyl-4'-nitro-4-(prop-1-en-1-yl)-1,1'-biphenyl (**2j**)

$^1\text{H}$  NMR, 400 MHz,  $\text{CDCl}_3$

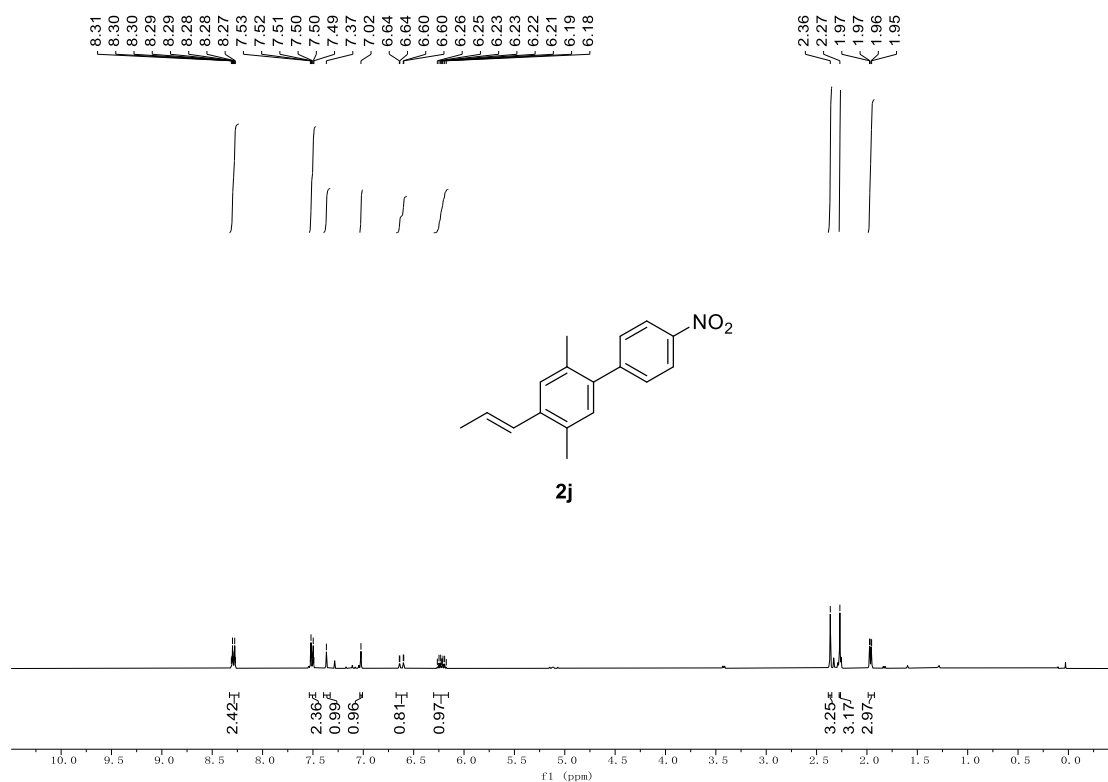

$^{13}\text{C}\{^1\text{H}\}$  NMR, 100 MHz,  $\text{CDCl}_3$

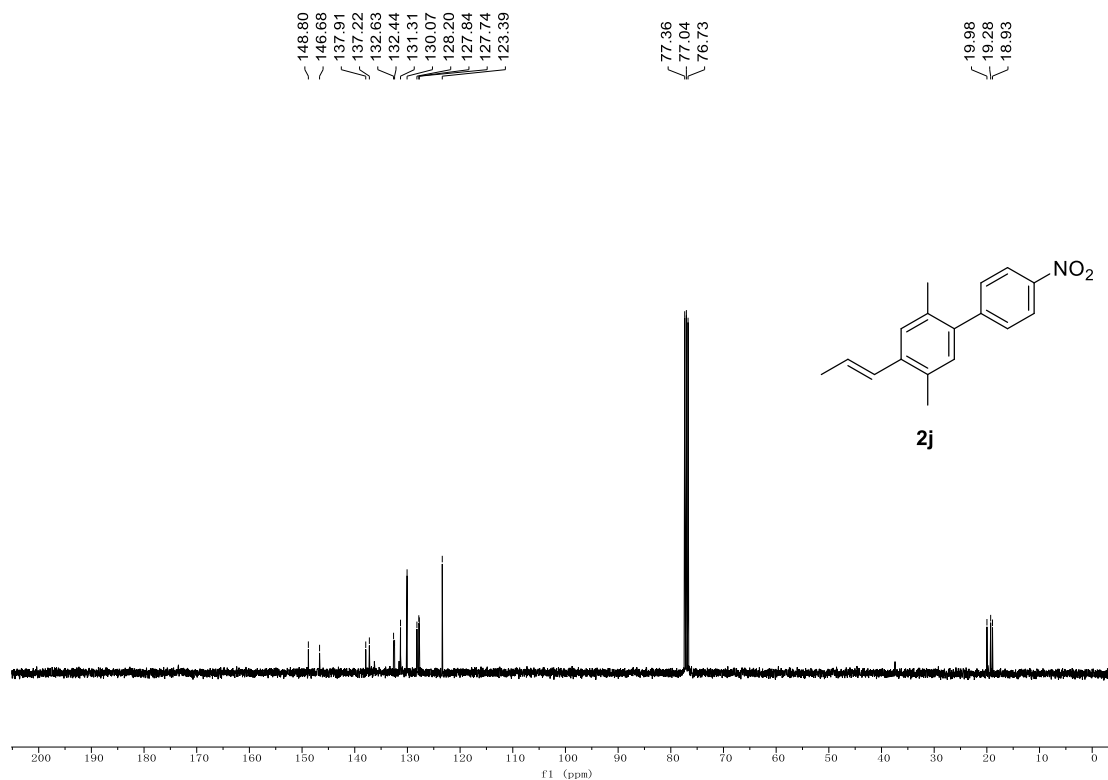

(E)-2,5-Dimethyl-4-(prop-1-en-1-yl)-4'-(trifluoromethyl)-1,1'-biphenyl (**2k**)

$^1\text{H}$  NMR, 400 MHz,  $\text{CDCl}_3$

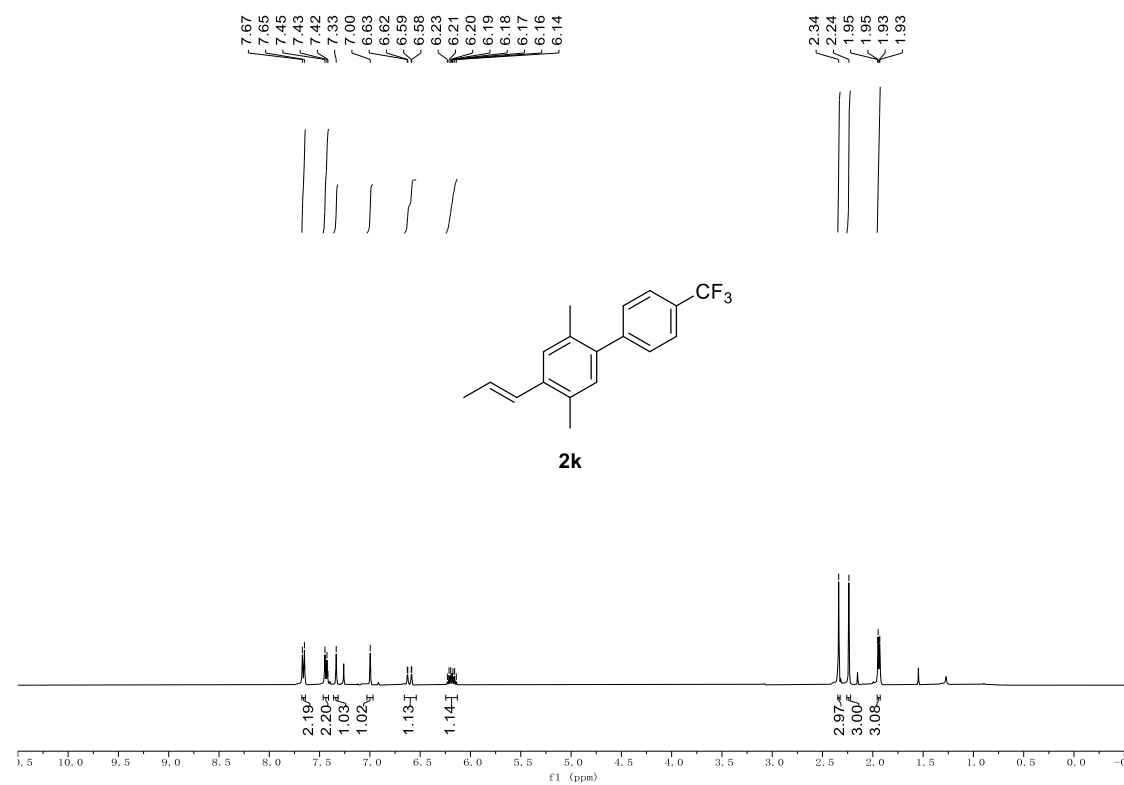



$^{13}\text{C}\{^1\text{H}\}$  NMR, 100 MHz,  $\text{CDCl}_3$

145.57  
138.87  
136.68  
132.55  
132.43  
131.46  
129.52  
129.00  
128.68  
128.36  
127.57  
127.42  
125.73  
125.05  
125.02  
124.98  
124.94  
123.02

77.34  
77.03  
76.71

19.94  
19.25  
18.88

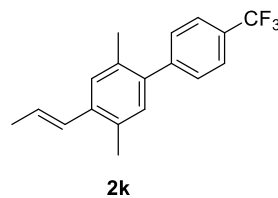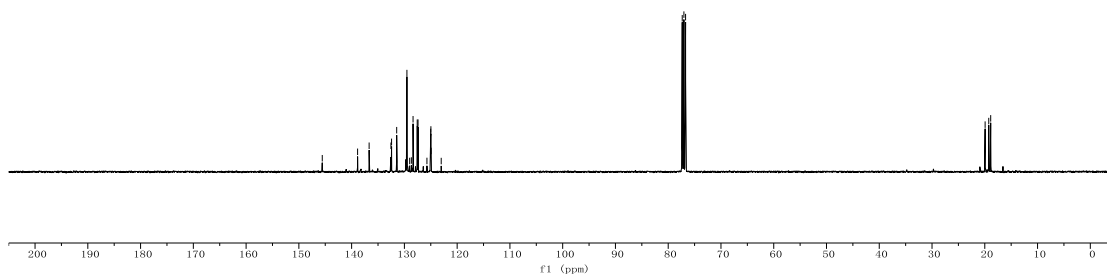

**(E)-2,2',5,6'-Tetramethyl-4-(prop-1-en-1-yl)-1,1'-biphenyl (2l)**

$^1\text{H}$  NMR, 400 MHz,  $\text{CDCl}_3$

7.36  
7.28  
7.20  
7.19  
7.18  
7.17  
7.16  
7.13  
7.11  
6.81  
6.67  
6.66  
6.63  
6.62  
6.25  
6.23  
6.22  
6.21  
6.20  
6.19  
6.18  
6.16

2.34  
1.99  
1.95

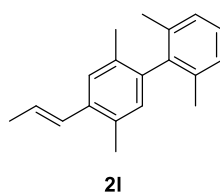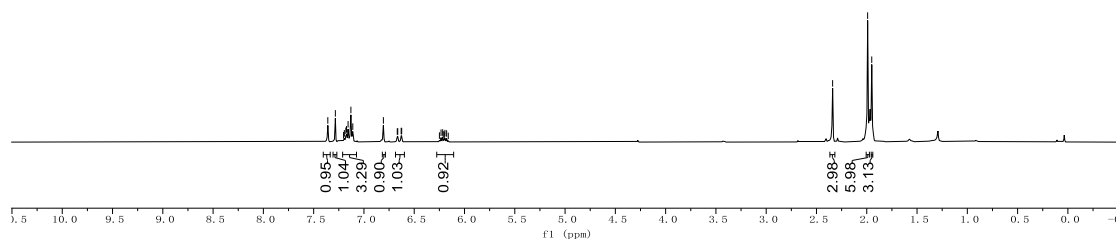

$^{13}\text{C}\{^1\text{H}\}$  NMR, 100 MHz,  $\text{CDCl}_3$

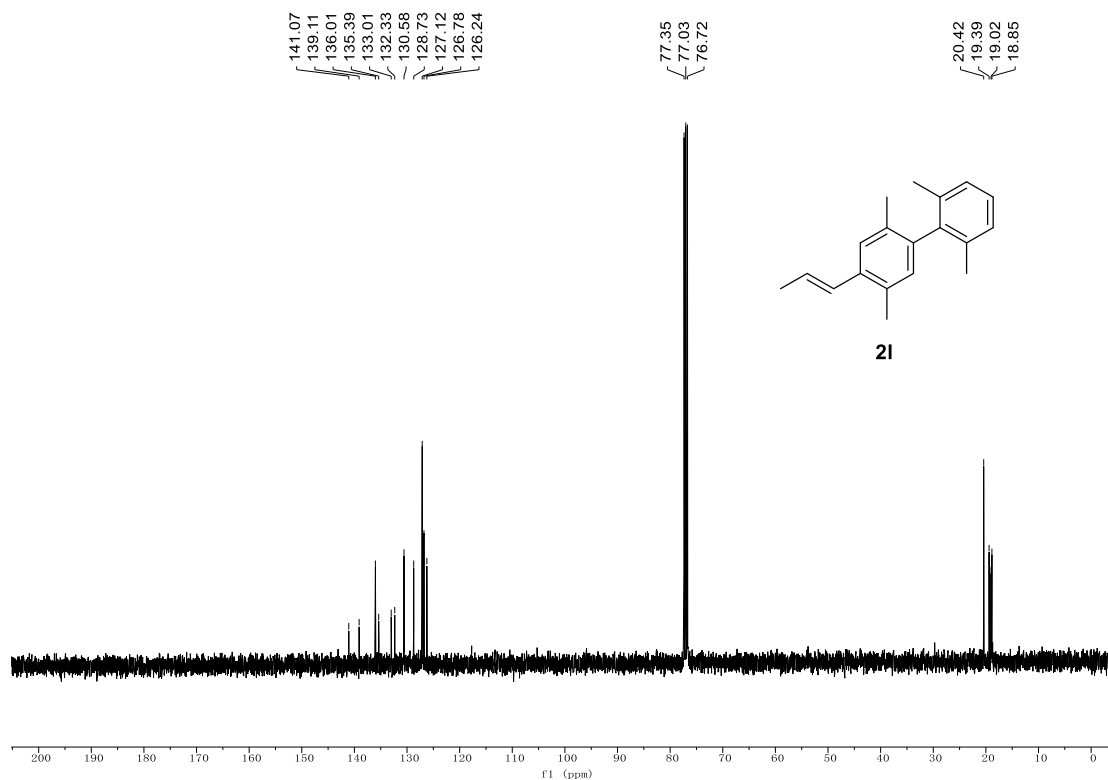

**(E)-1,2,4-Trimethyl-5-(prop-1-en-1-yl)benzene (2m)**

$^1\text{H}$  NMR, 400 MHz,  $\text{CDCl}_3$

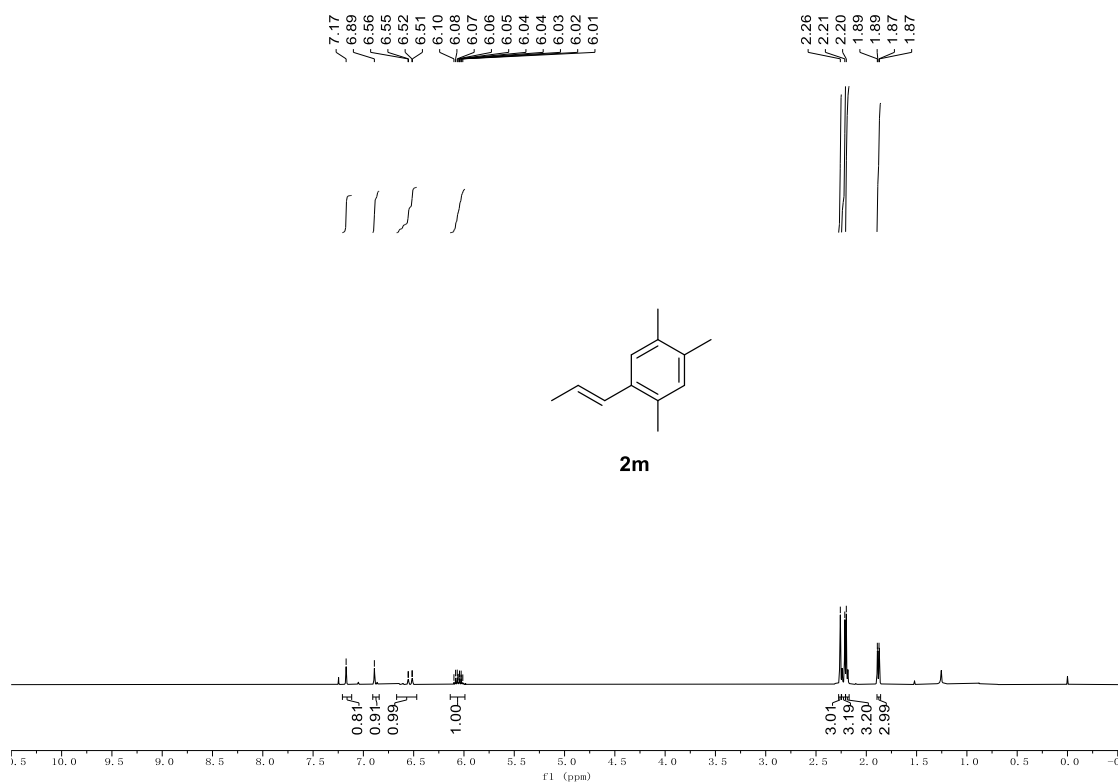

$^{13}\text{C}\{^1\text{H}\}$  NMR, 100 MHz,  $\text{CDCl}_3$

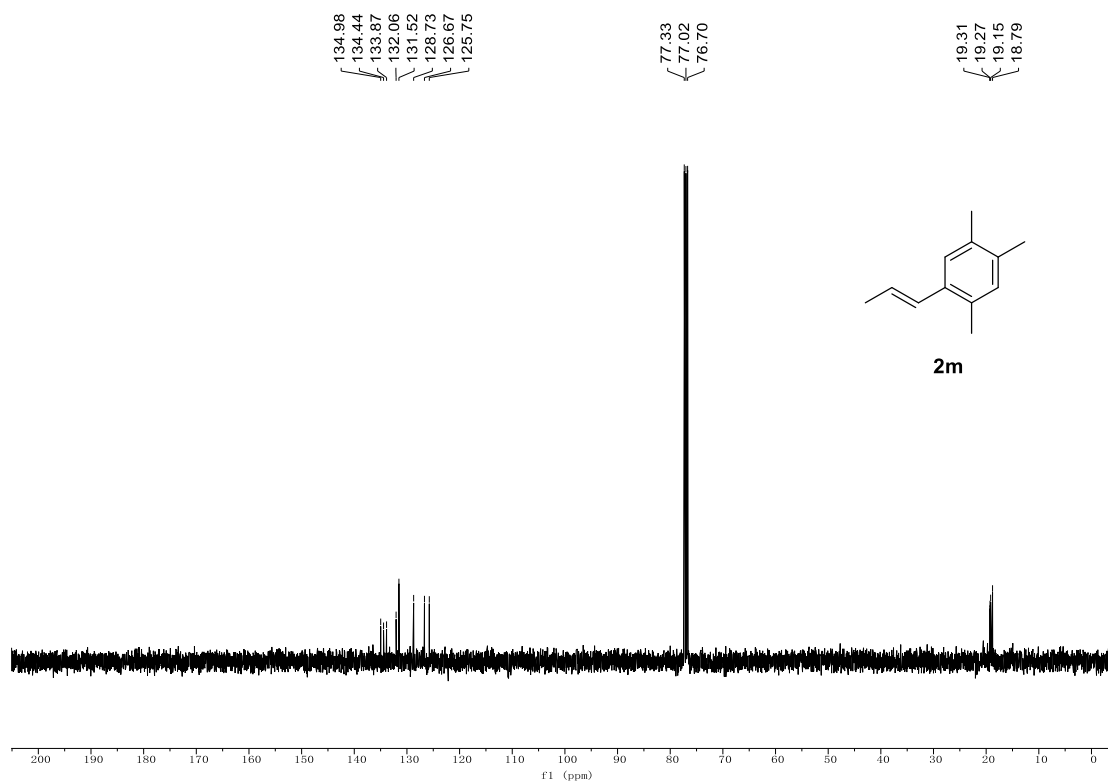

**(E)-2-(2,5-Dimethyl-4-(prop-1-en-1-yl)phenyl)thiophene (2n)**

$^1\text{H}$  NMR, 400 MHz,  $\text{CDCl}_3$

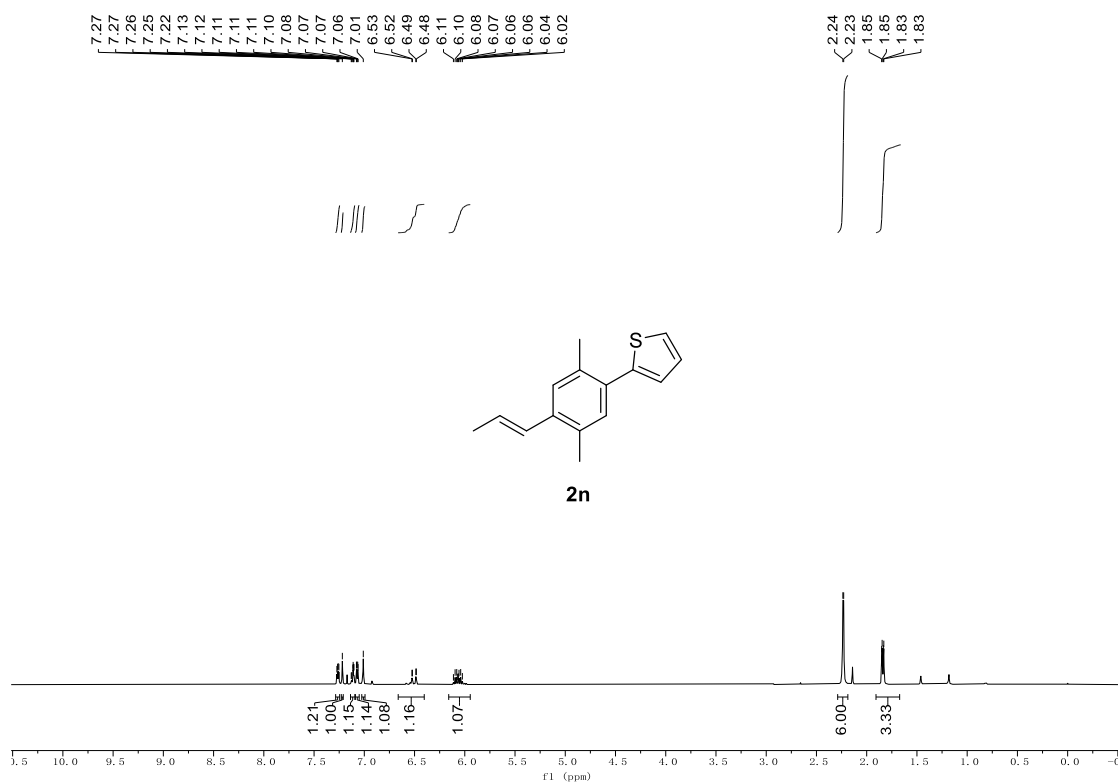

$^{13}\text{C}\{^1\text{H}\}$  NMR, 100 MHz,  $\text{CDCl}_3$

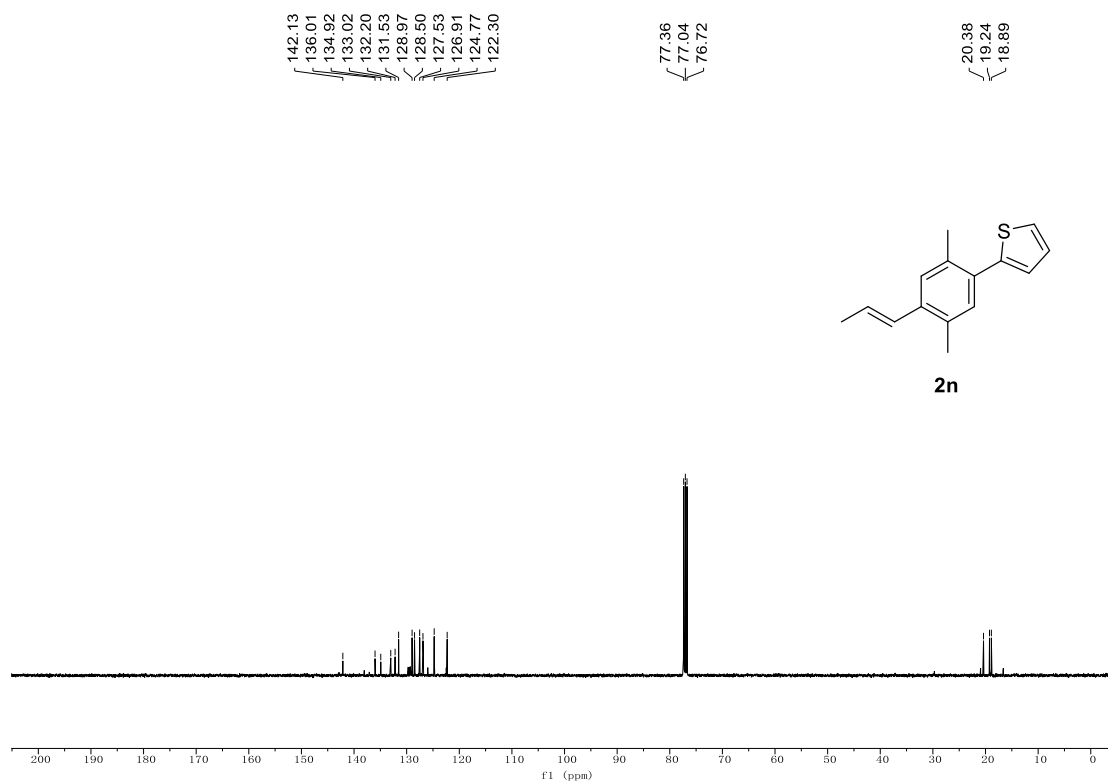

**(E)-2-(2,5-Dimethyl-4-(prop-1-en-1-yl)phenyl)naphthalene (2o)**

$^1\text{H}$  NMR, 400 MHz,  $\text{CDCl}_3$

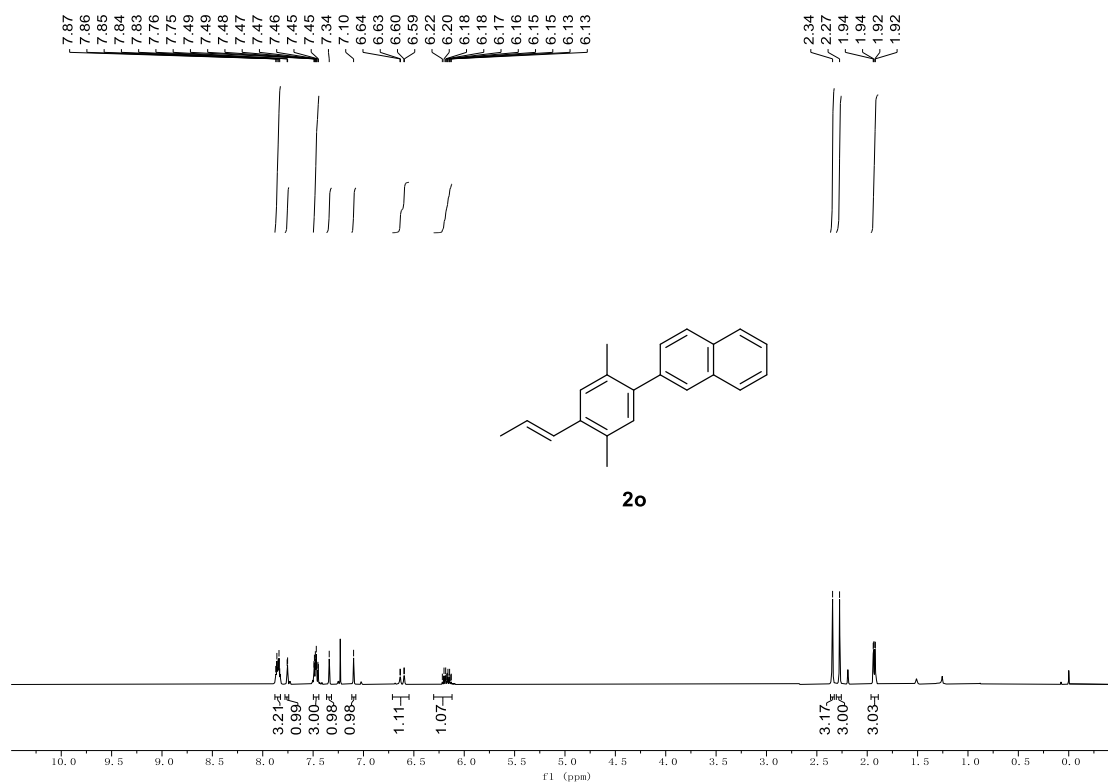

$^{13}\text{C}\{^1\text{H}\}$  NMR, 100 MHz,  $\text{CDCl}_3$

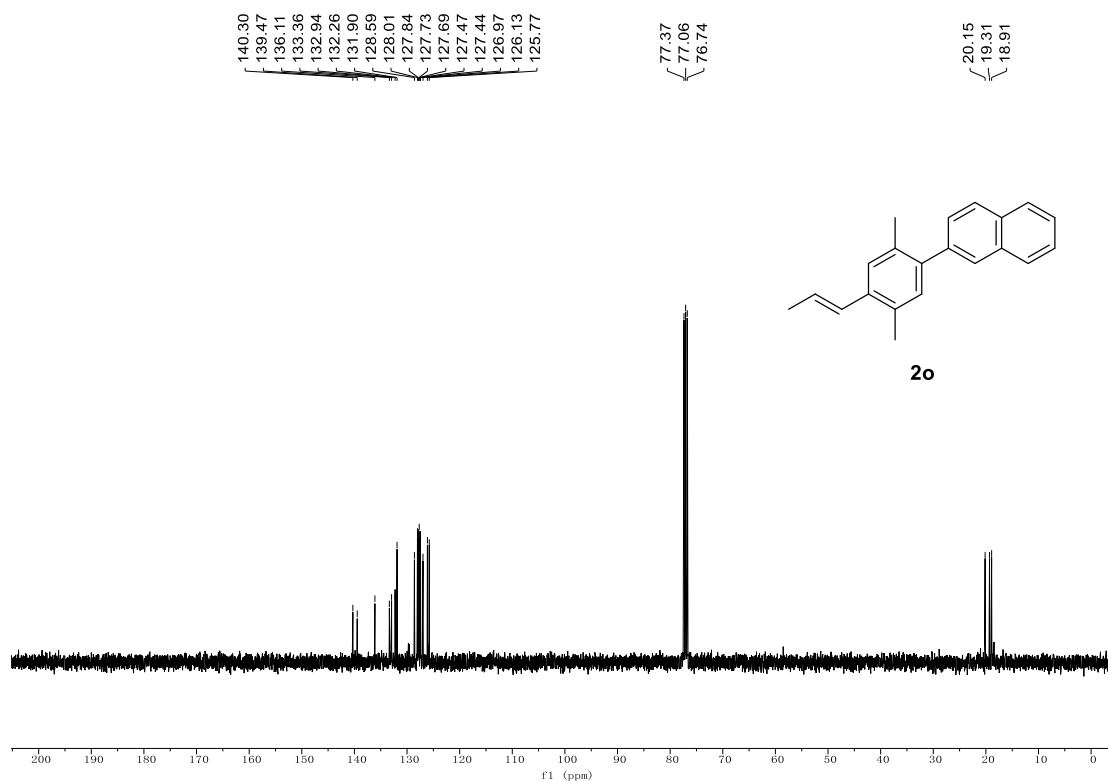

### 2-(2,5-Dimethyl-[1,1'-biphenyl]-4-yl)-3-methyloxirane (**2a-1**)

$^1\text{H}$  NMR, 400 MHz,  $\text{CDCl}_3$

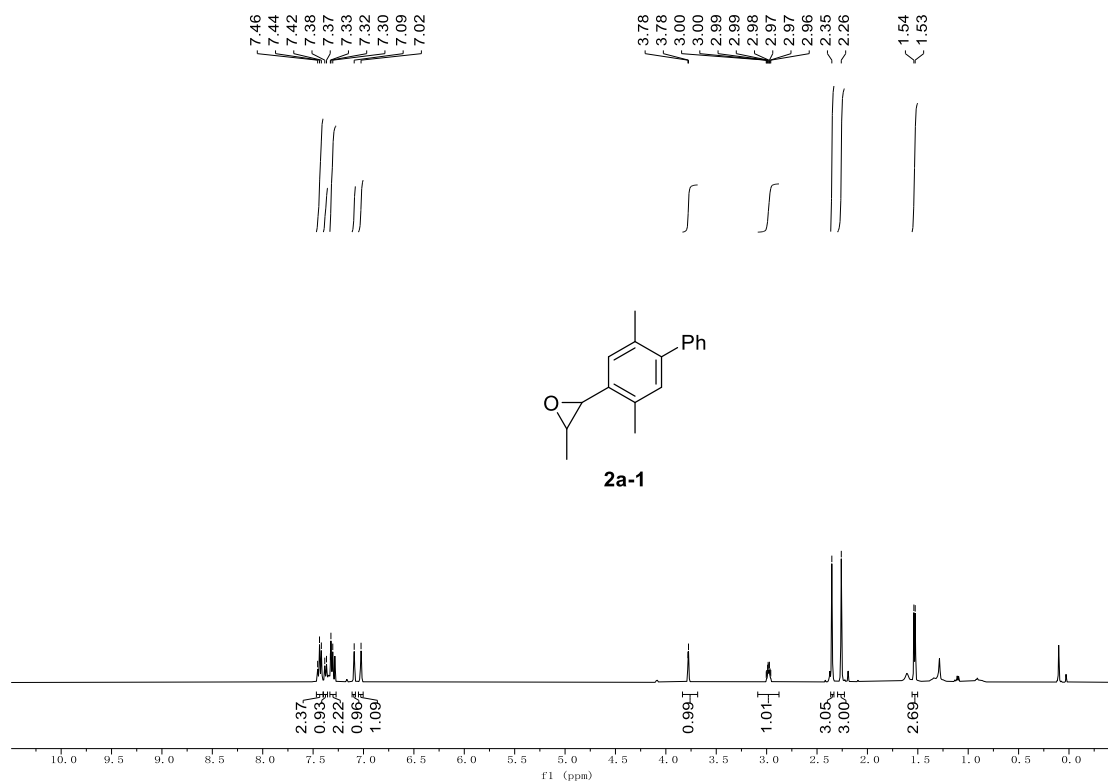

$^{13}\text{C}\{^1\text{H}\}$  NMR, 100 MHz,  $\text{CDCl}_3$

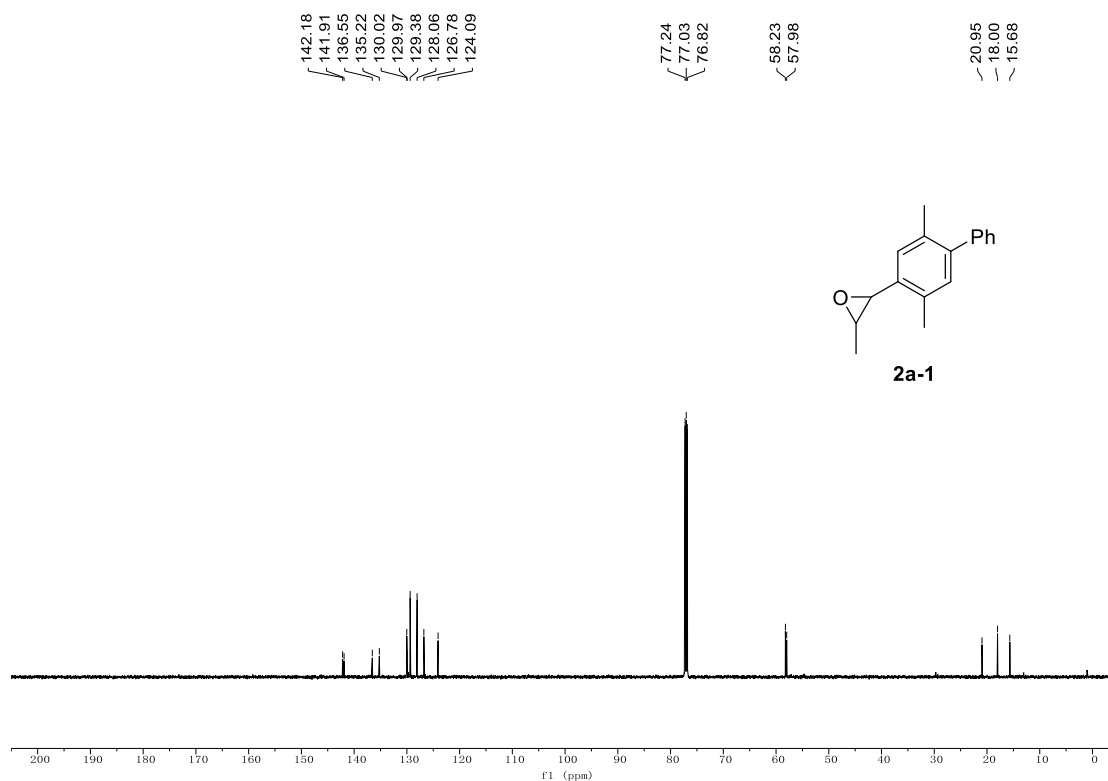

**2-Bromo-1-(2,5-dimethyl-[1,1'-biphenyl]-4-yl)propan-1-ol (2a-2)**

$^1\text{H}$  NMR, 400 MHz,  $\text{CDCl}_3$

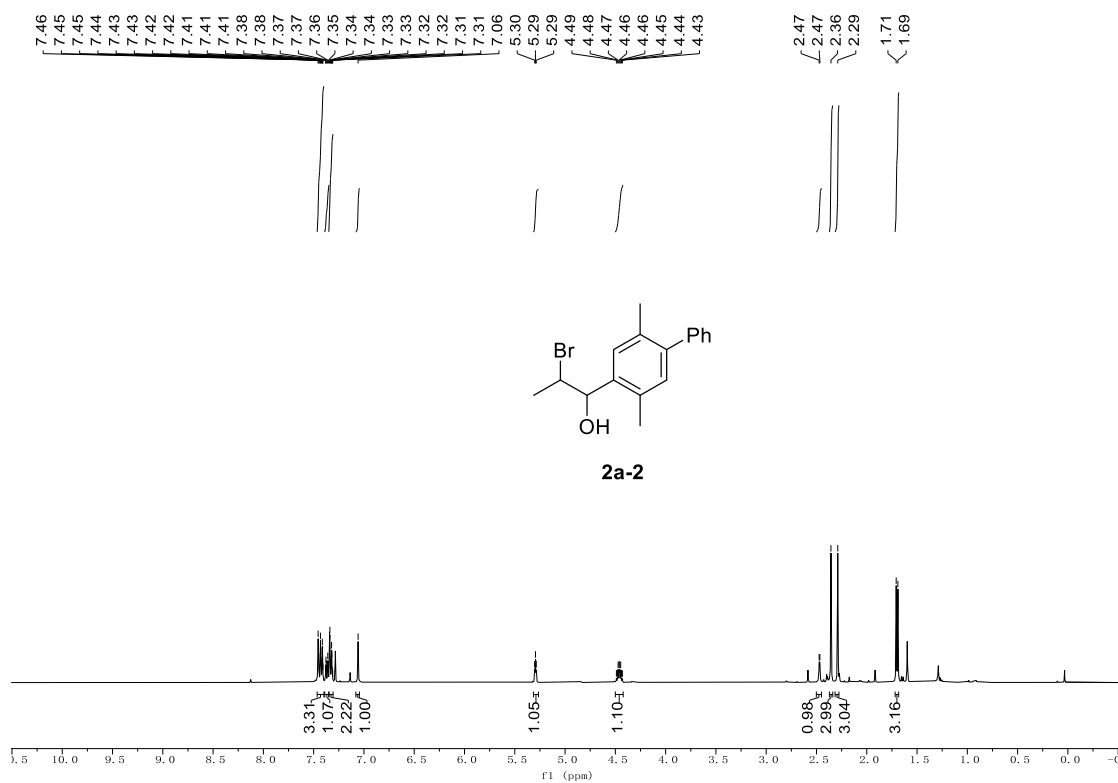

$^{13}\text{C}\{^1\text{H}\}$  NMR, 100 MHz,  $\text{CDCl}_3$

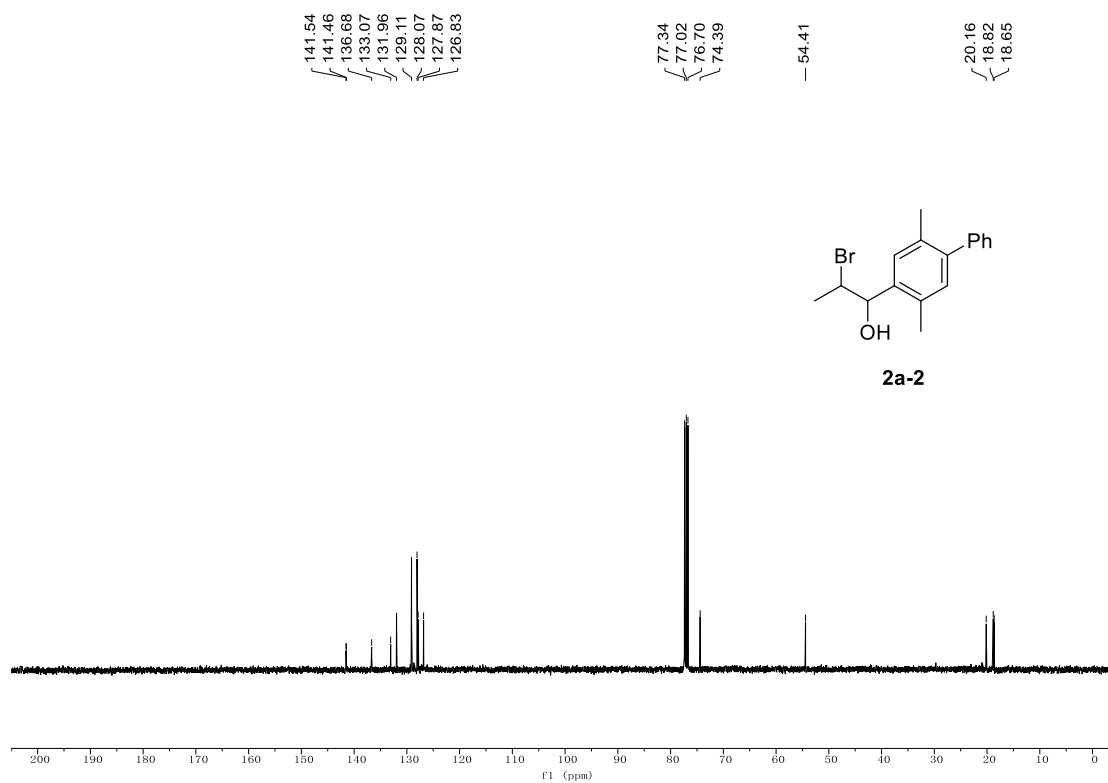

**1-(2,5-Dimethyl-[1,1'-biphenyl]-4-yl)propane-1,2-dione (2a-3)**

$^1\text{H}$  NMR, 400 MHz,  $\text{CDCl}_3$

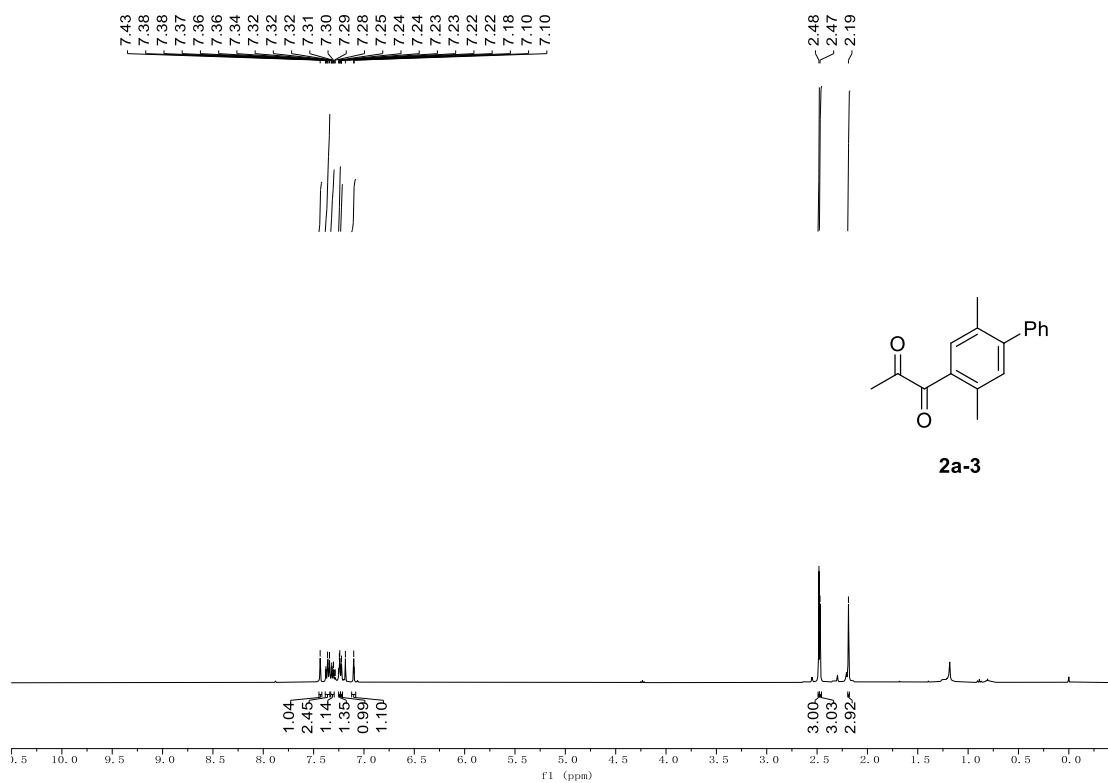

$^{13}\text{C}\{^1\text{H}\}$  NMR, 100 MHz,  $\text{CDCl}_3$

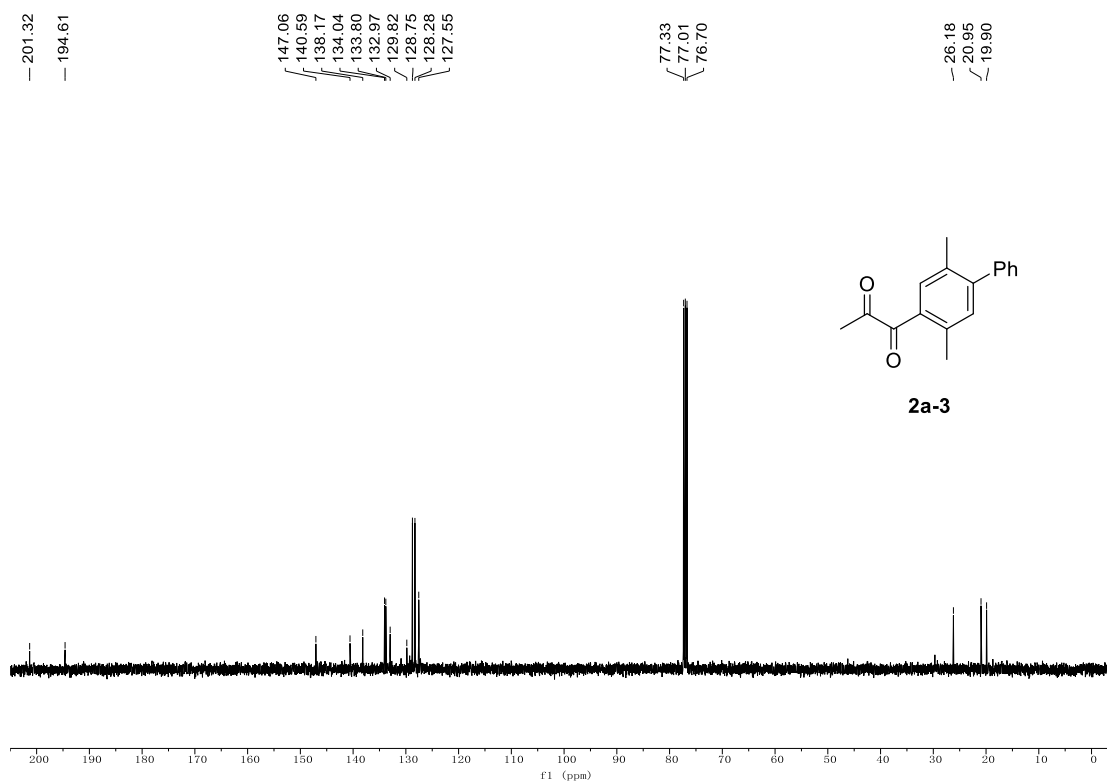

(E)-3-(2,5-Dimethyl-[1,1'-biphenyl]-4-yl)acrylonitrile (**2a-4**)

$^1\text{H}$  NMR, 400 MHz,  $\text{CDCl}_3$

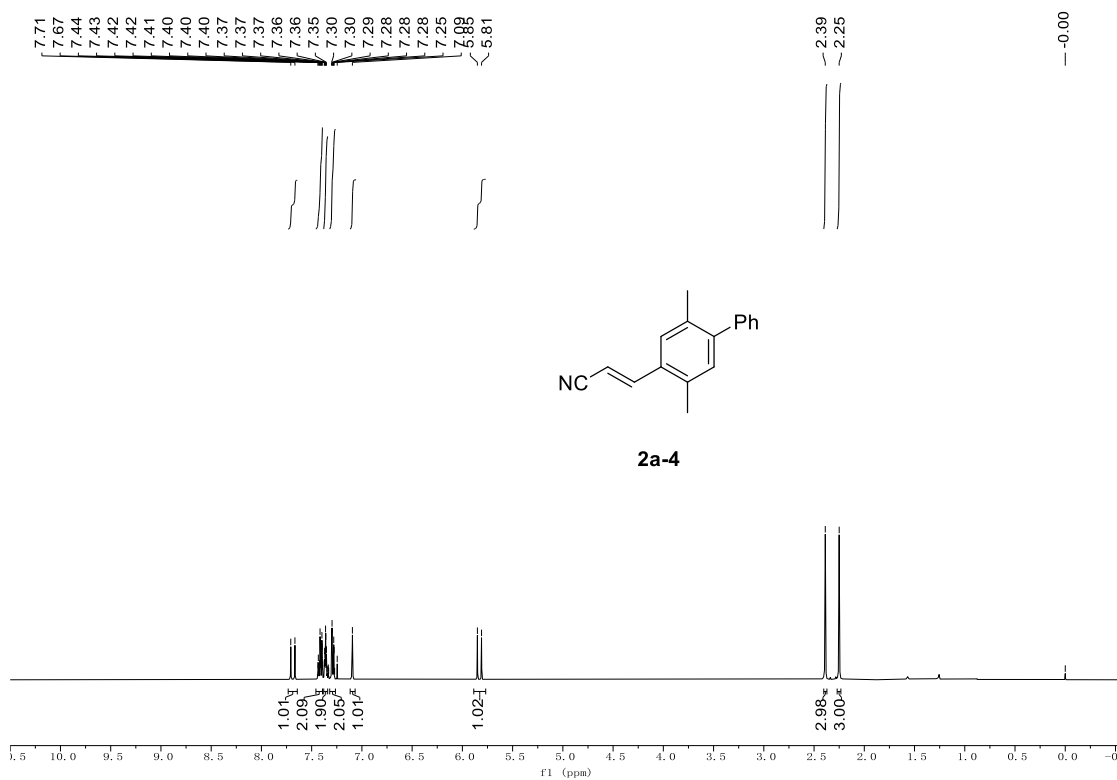

$^{13}\text{C}\{^1\text{H}\}$  NMR, 100 MHz,  $\text{CDCl}_3$



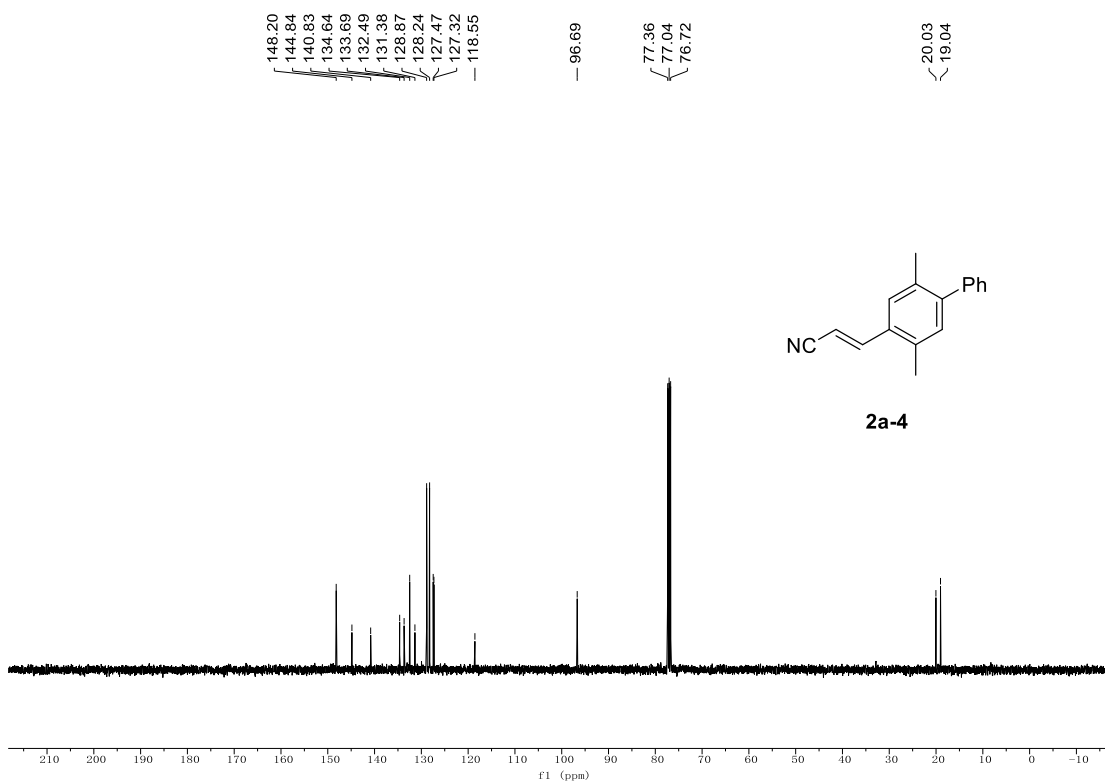

**(E)-3-(2,5-Dimethyl-[1,1'-biphenyl]-4-yl)acrylaldehyde (2a-5)**

<sup>1</sup>H NMR, 400 MHz, CDCl<sub>3</sub>

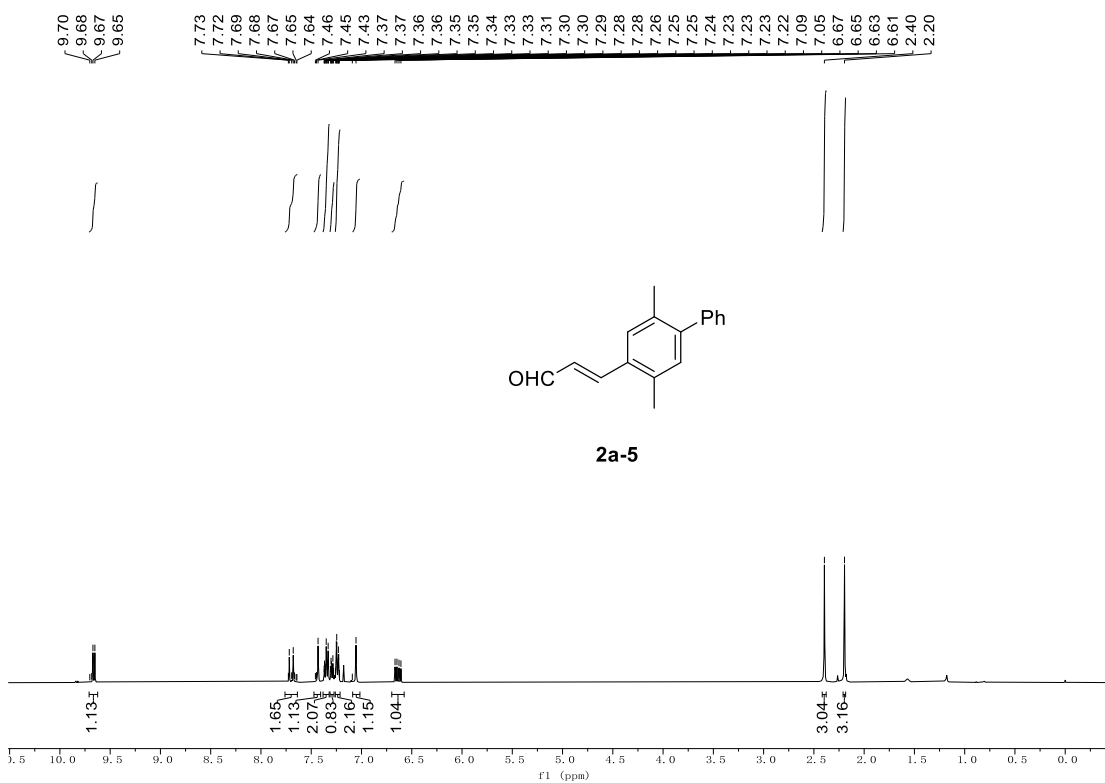

$^{13}\text{C}\{^1\text{H}\}$  NMR, 100 MHz,  $\text{CDCl}_3$

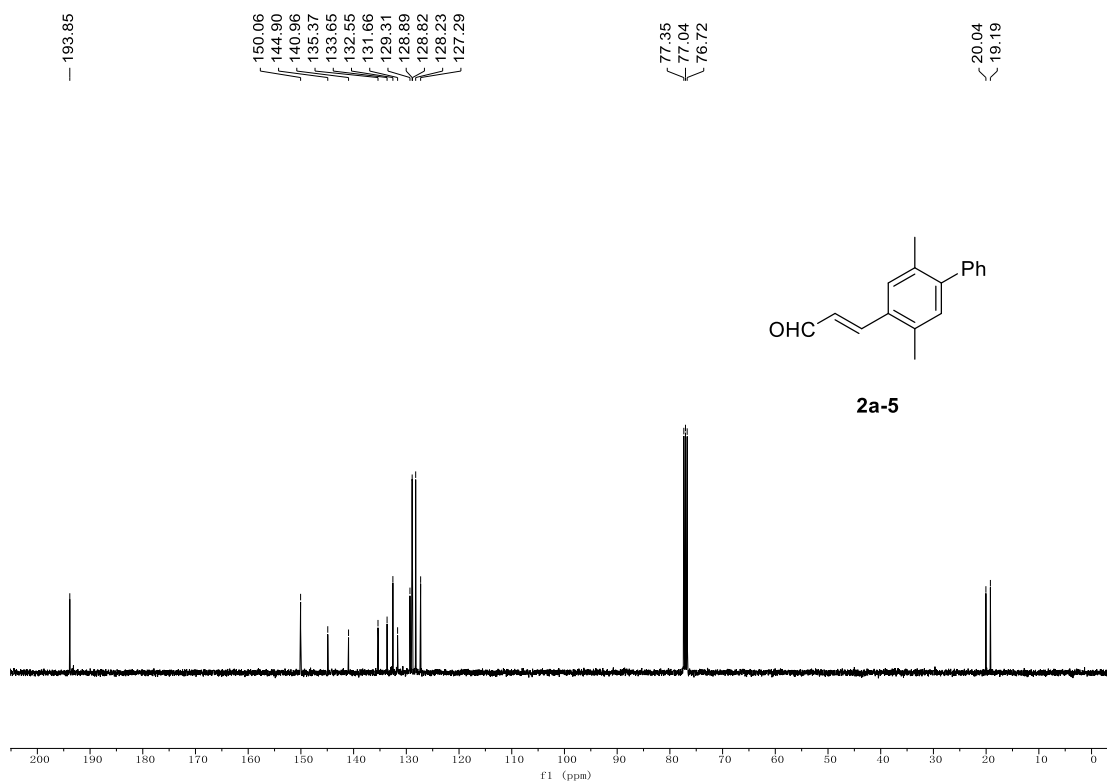

**5-Methyl-2-methylene-5-(prop-1-en-1-yl)-2,5-dihydro-1,1'-biphenyl (C)**

$^1\text{H}$  NMR, 400 MHz,  $\text{CDCl}_3$

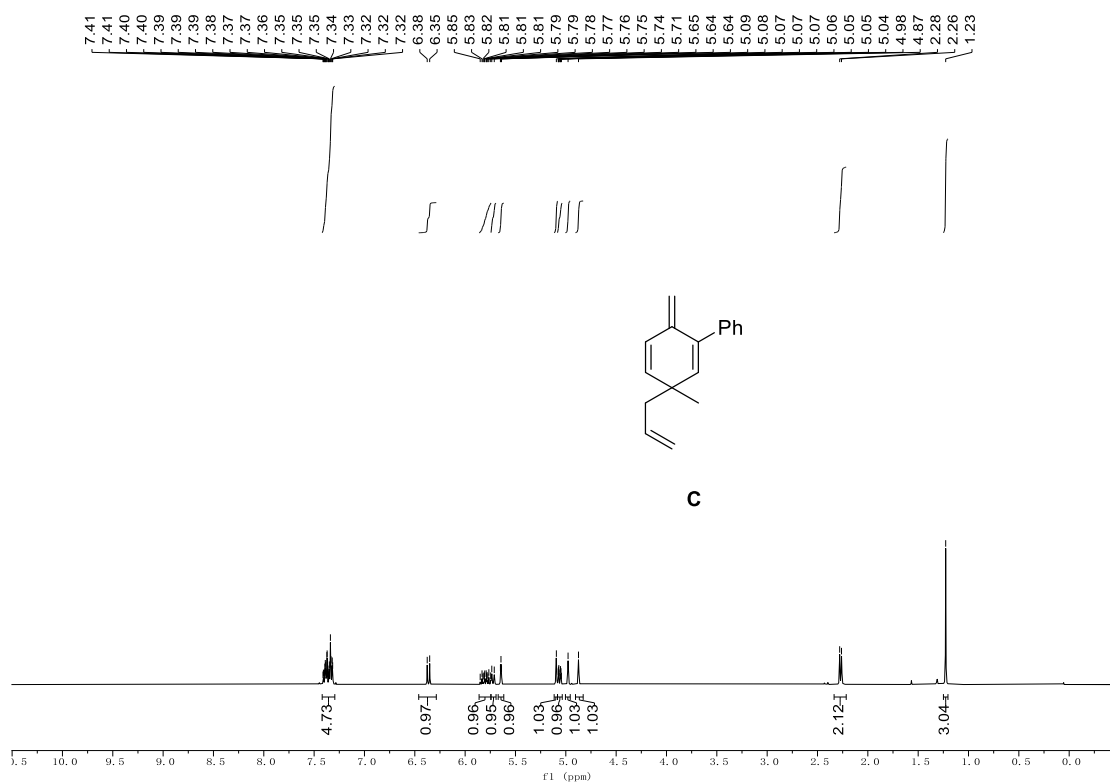

$^{13}\text{C}\{^1\text{H}\}$  NMR, 100 MHz,  $\text{CDCl}_3$

140.73  
138.56  
137.33  
137.29  
136.23  
134.78  
129.10  
128.01  
127.42  
126.99  
117.18  
112.74

77.38  
77.06  
76.74

47.18  
40.25  
28.11

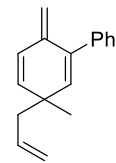

**c**

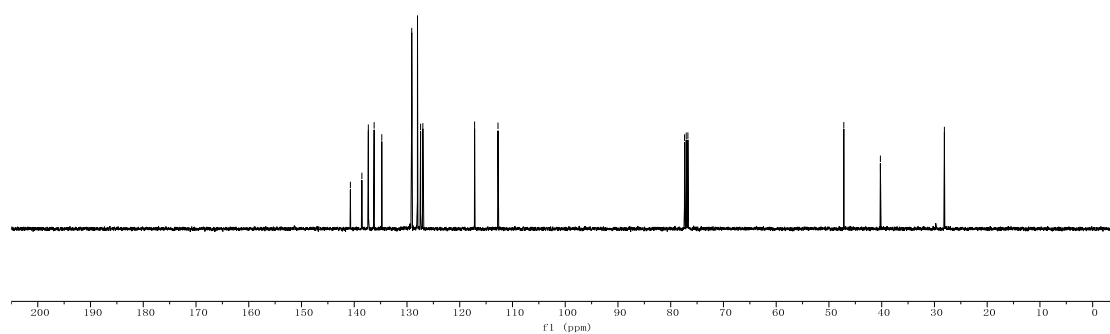

### 4-Allyl-2,5-dimethyl-1,1'-biphenyl (2a')

$^1\text{H}$  NMR, 400 MHz,  $\text{CDCl}_3$

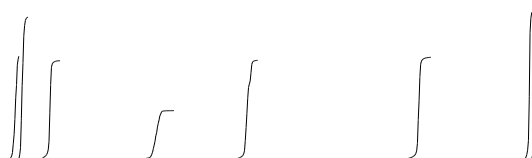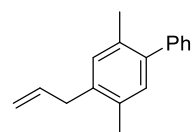

**2a'**

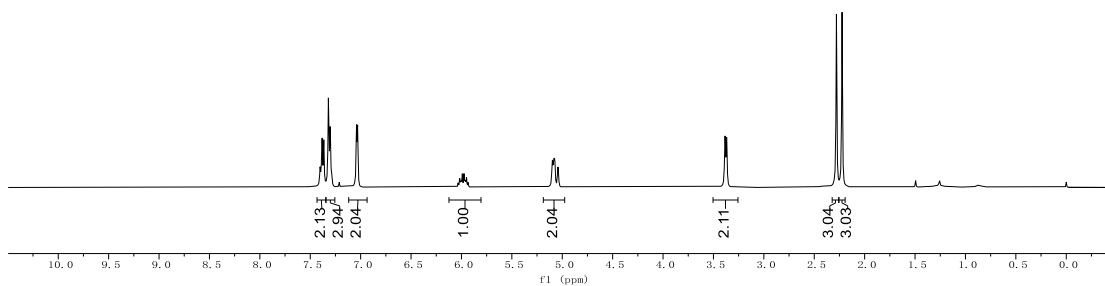

$^{13}\text{C}\{^1\text{H}\}$  NMR, 100 MHz,  $\text{CDCl}_3$

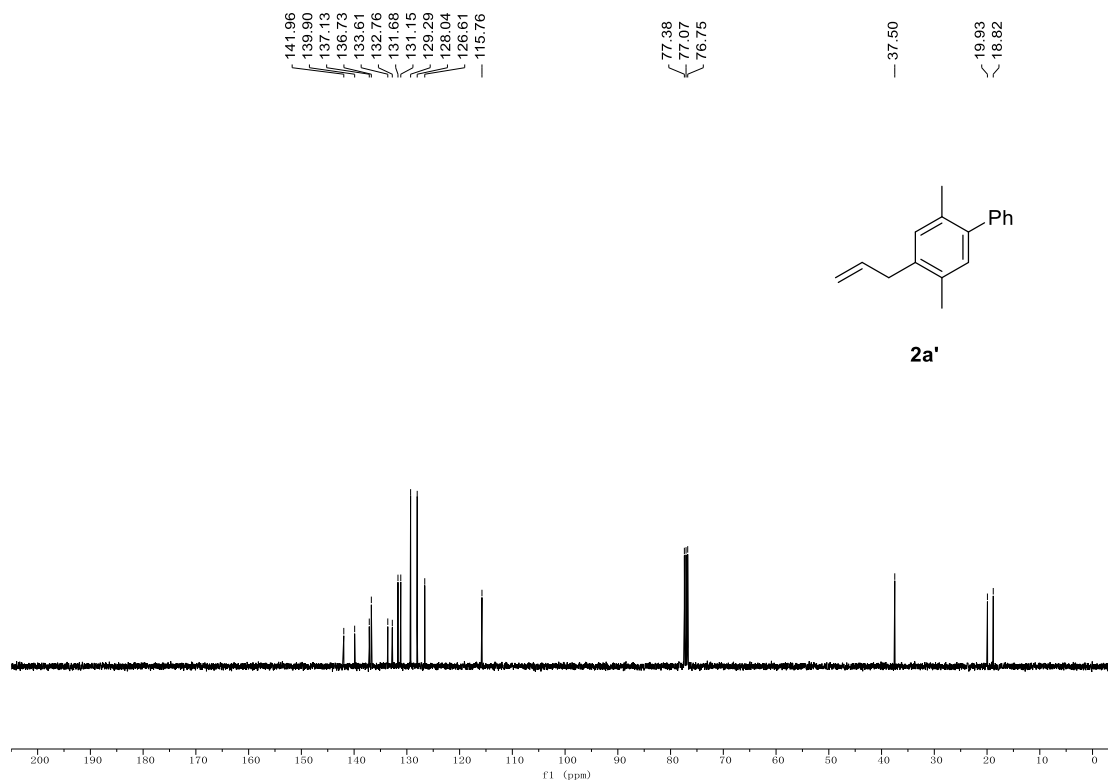

**4'-(chloromethyl)-1,1':3',1''-terphenyl (3a)**

$^1\text{H}$  NMR, 400 MHz,  $\text{CDCl}_3$

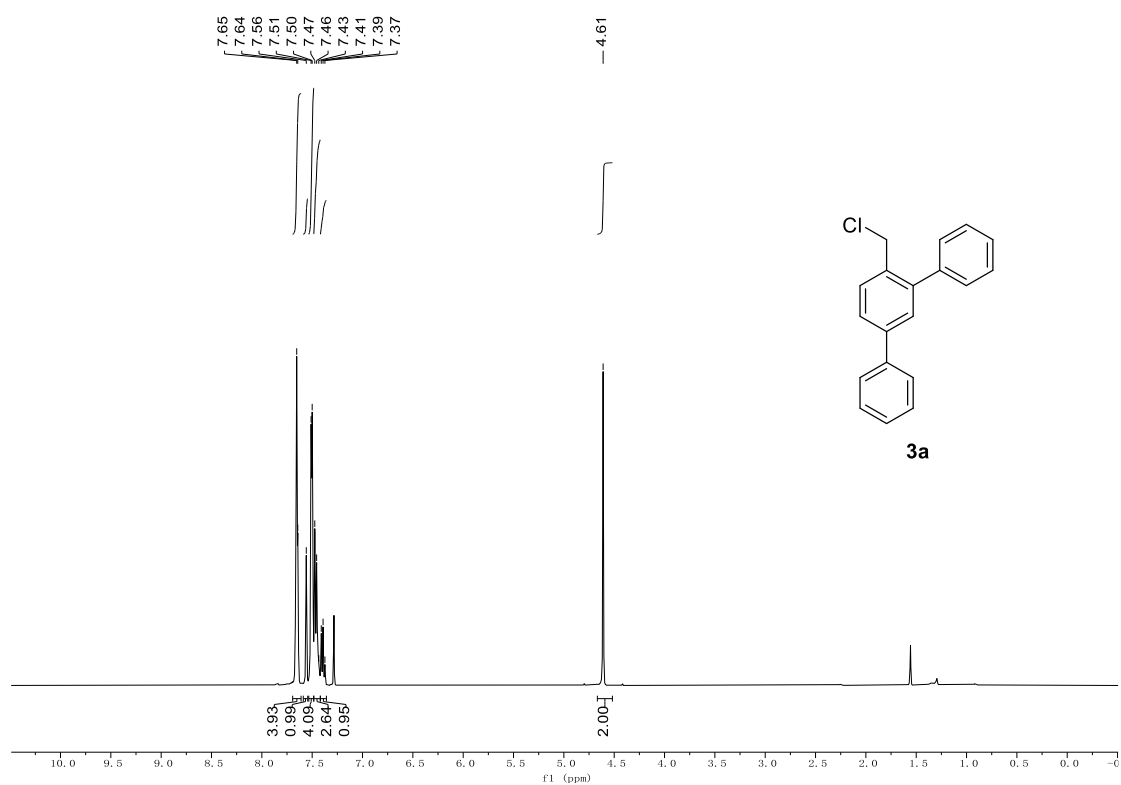

$^{13}\text{C}\{^1\text{H}\}$  NMR, 100 MHz,  $\text{CDCl}_3$

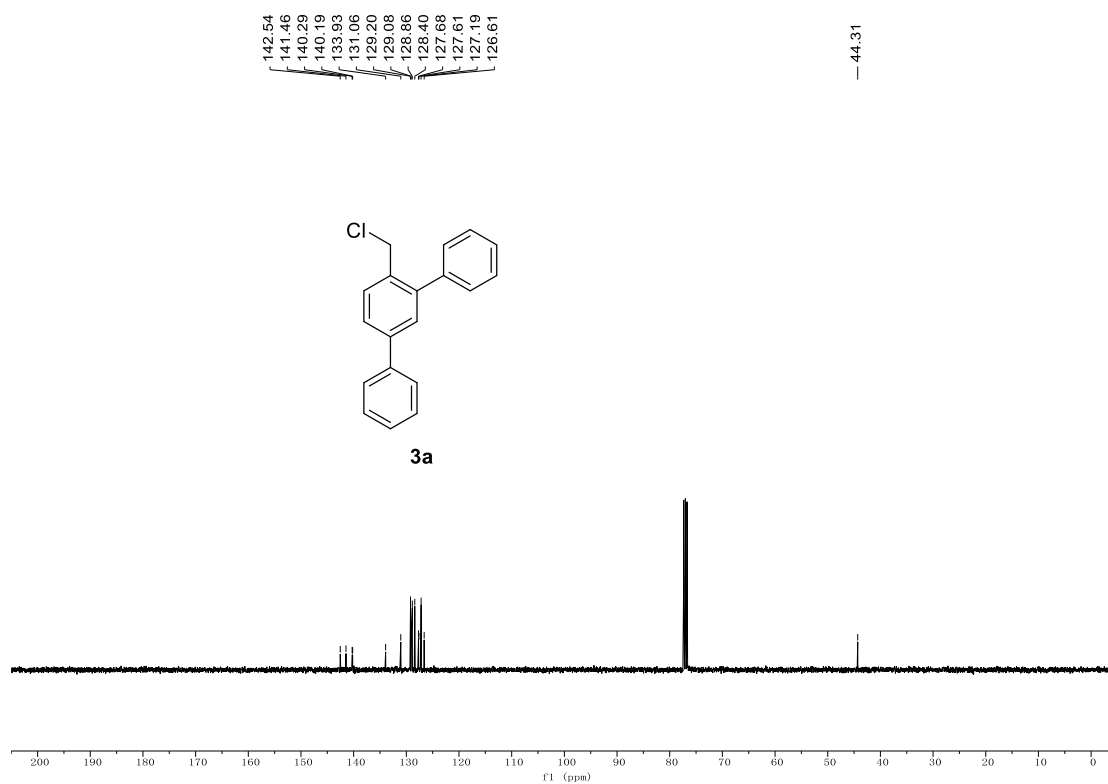

**(E)-4'-methyl-6'-(prop-1-en-1-yl)-1,1':3',1''-terphenyl (3aa) and (E)-3-(6'-methyl-[1,1':3',1''-terphenyl]-4'-yl)allylium (3aa')**

$^1\text{H}$  NMR, 400 MHz,  $\text{CDCl}_3$

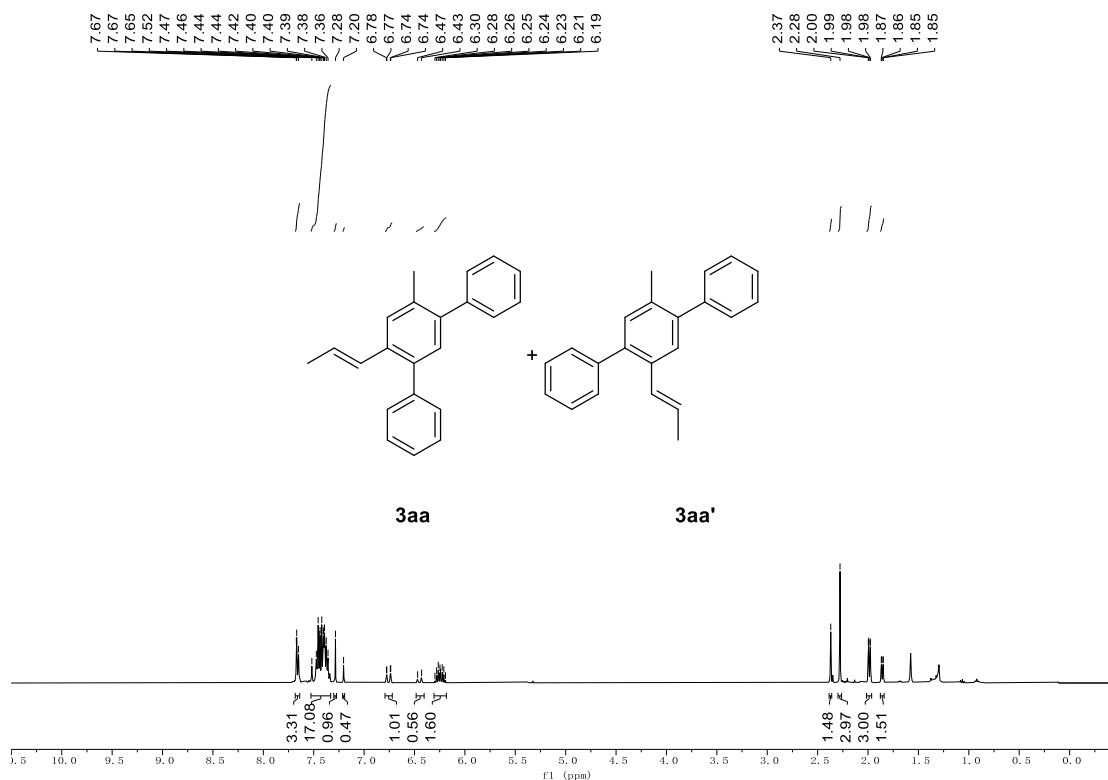

$^{13}\text{C}\{^1\text{H}\}$  NMR, 100 MHz,  $\text{CDCl}_3$

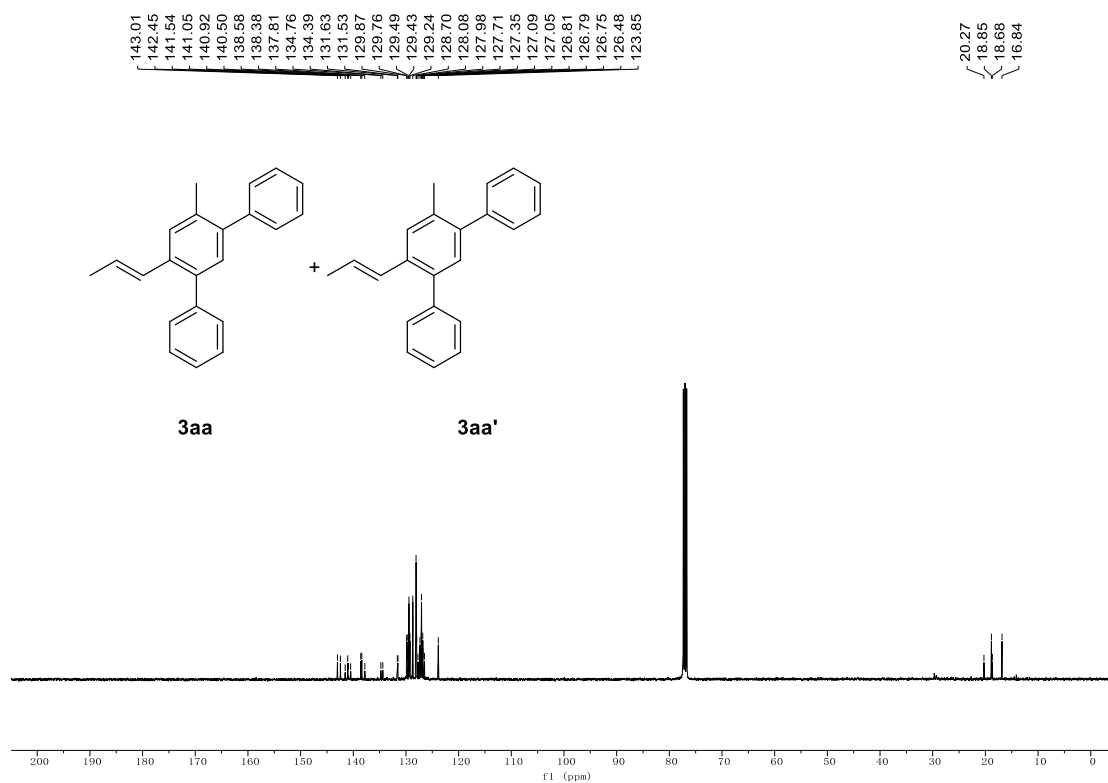

## 8. References

- (1) Ji, K.; Yang, F.; Gao, S.; Tang, J.; Gao, J. Gold-Catalyzed Oxidation/C–H Functionalization of Ynones: Efficient and Rapid Access to Functionalized Polycyclic Salicyl Ketones. *Chem. Eur. J.* **2016**, *22*, 10225;
- (2) Granchi, G.; Caligiuri, I.; Bertelli, I.; Poli, G.; Rizzolio, F.; Macchia, M.; Martinelli, A.; Minutolo, F.; Tuccinardi, T. Development of terphenyl-2-methyloxazol-5(4H)-one derivatives as selective reversible MAGL inhibitors, *Journal of Enzyme Inhibition and Medicinal Chemistry*, *J. Enzym. Inhib. Med. Ch.* **2017**, *32*, 1240-1252
- (3) Cabré, A.; Cabezas-Giménez, J.; Sciortino, G.; Ujaque, G.; Verdaguer, X.; Lledós, A.; Riera, A. Mild Iridium-Catalysed Isomerization of Epoxides. Computational Insights and Application to the Synthesis of  $\beta$ -Alkyl Amines. *Adv. Synth. Catal.* **2019**, *361*, 3624-3631.
- (4) Dalton, D. R.; Davis, R. M. Bromohydrin formation in dimethyl sulfoxide the reaction of conjugated dienes. *Tetrahedron Lett.* **1972**, *13*, 1057-1060.
- (5) Donohoe, T. J.; Kabeshov, M. A.; Rathi, A. H.; Smith, I. E. D. Direct preparation of thiazoles, imidazoles, imidazopyridines and thiazolidines from alkenes. *Org. Biomol. Chem.* **2012**, *10*, 1093-1101.
- (6) Qin, C.; Jiao, N. Iron-Facilitated Direct Oxidative C–H Transformation of Allylarenes or Alkenes to Alkenyl Nitriles. *J. Am. Chem. Soc.* **2010**, *132*, 15893-15895.
- (7) Chen, H.; Jiang, H.; Cai, C.; Dong, J.; Fu, W. Facile Synthesis of (*E*)-Alkenyl Aldehydes from Allyl Arenes or Alkenes via Pd(II)-Catalyzed Direct Oxygenation of Allylic C–H Bond. *Org. Lett.* **2011**, *13*, 992-994.
- (8) Rabten, W.; Margarita, C.; Eriksson, L.; Andersson, P. G. Ir-Catalyzed Asymmetric and Regioselective Hydrogenation of Cyclic Allylsilanes and Generation of Quaternary Stereocenters via the Hosomi-Sakurai Allylation. *Chem. Eur. J.* **2018**, *24*, 1681.
